# Supplementary material
Source: ML conference proceedings conference paper supplement (https://openreview.net/forum?id=P-73JPgRs0R)

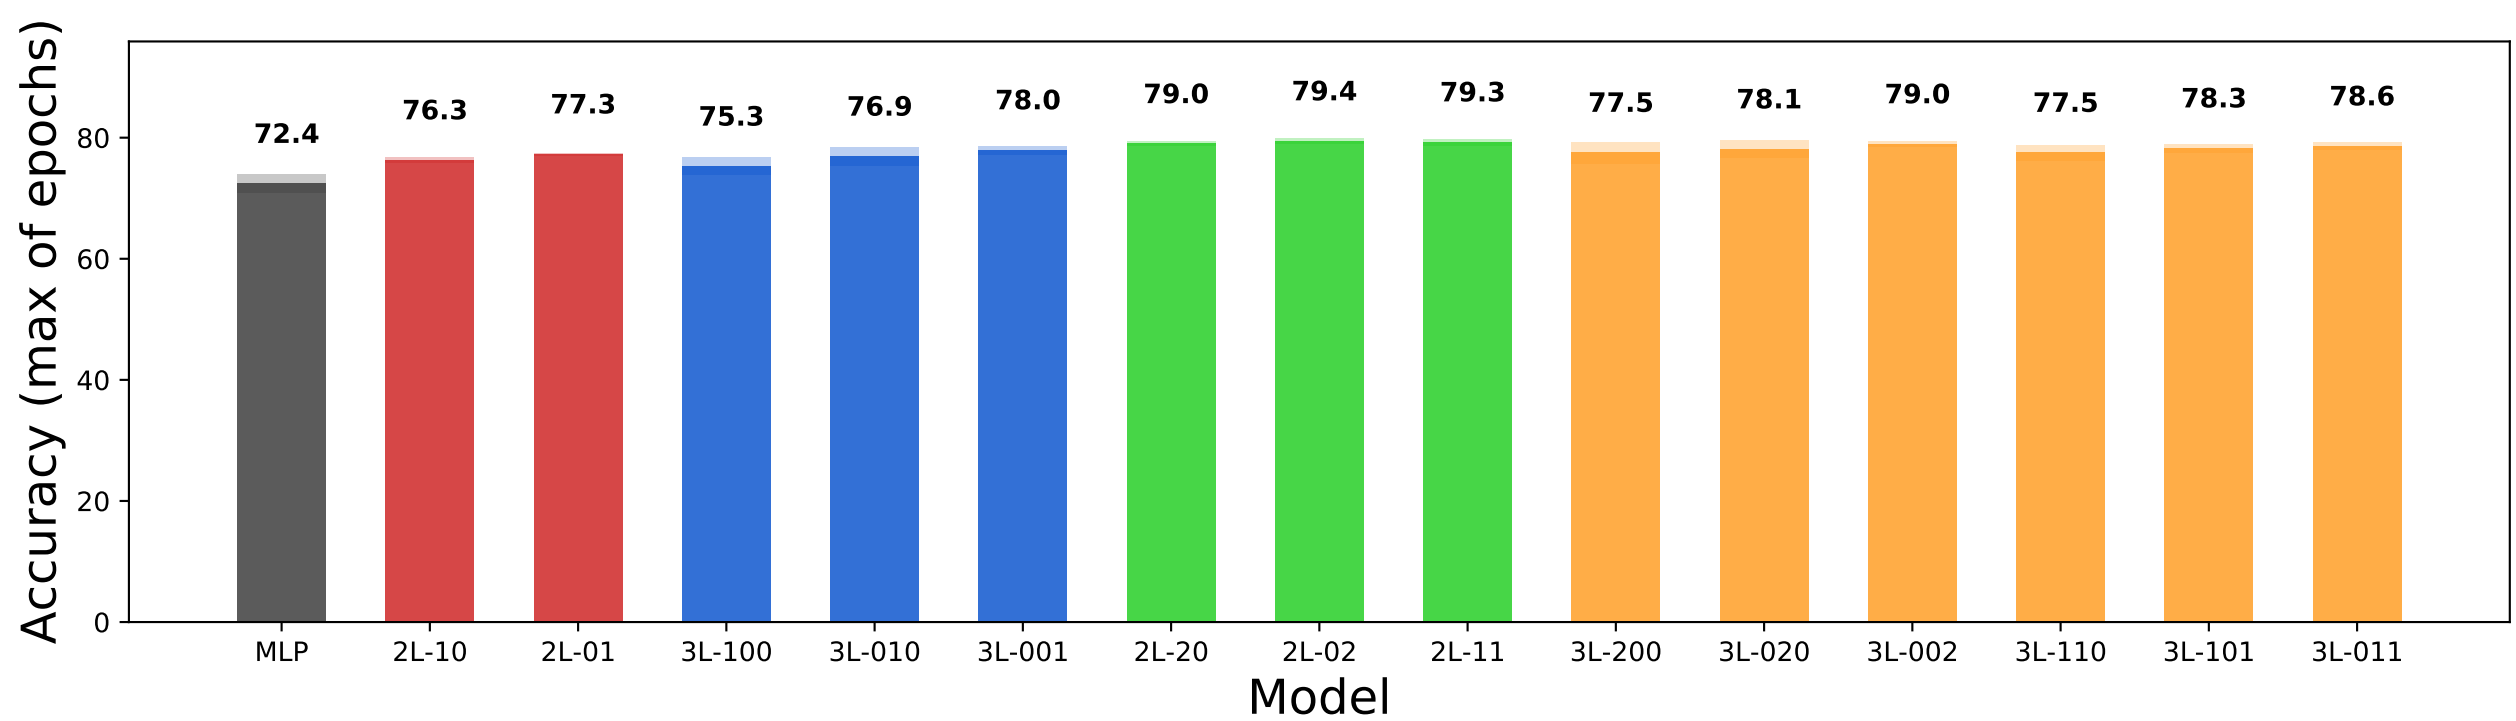

Supplement: supplementary_material [file attachment]

Test Accuracy

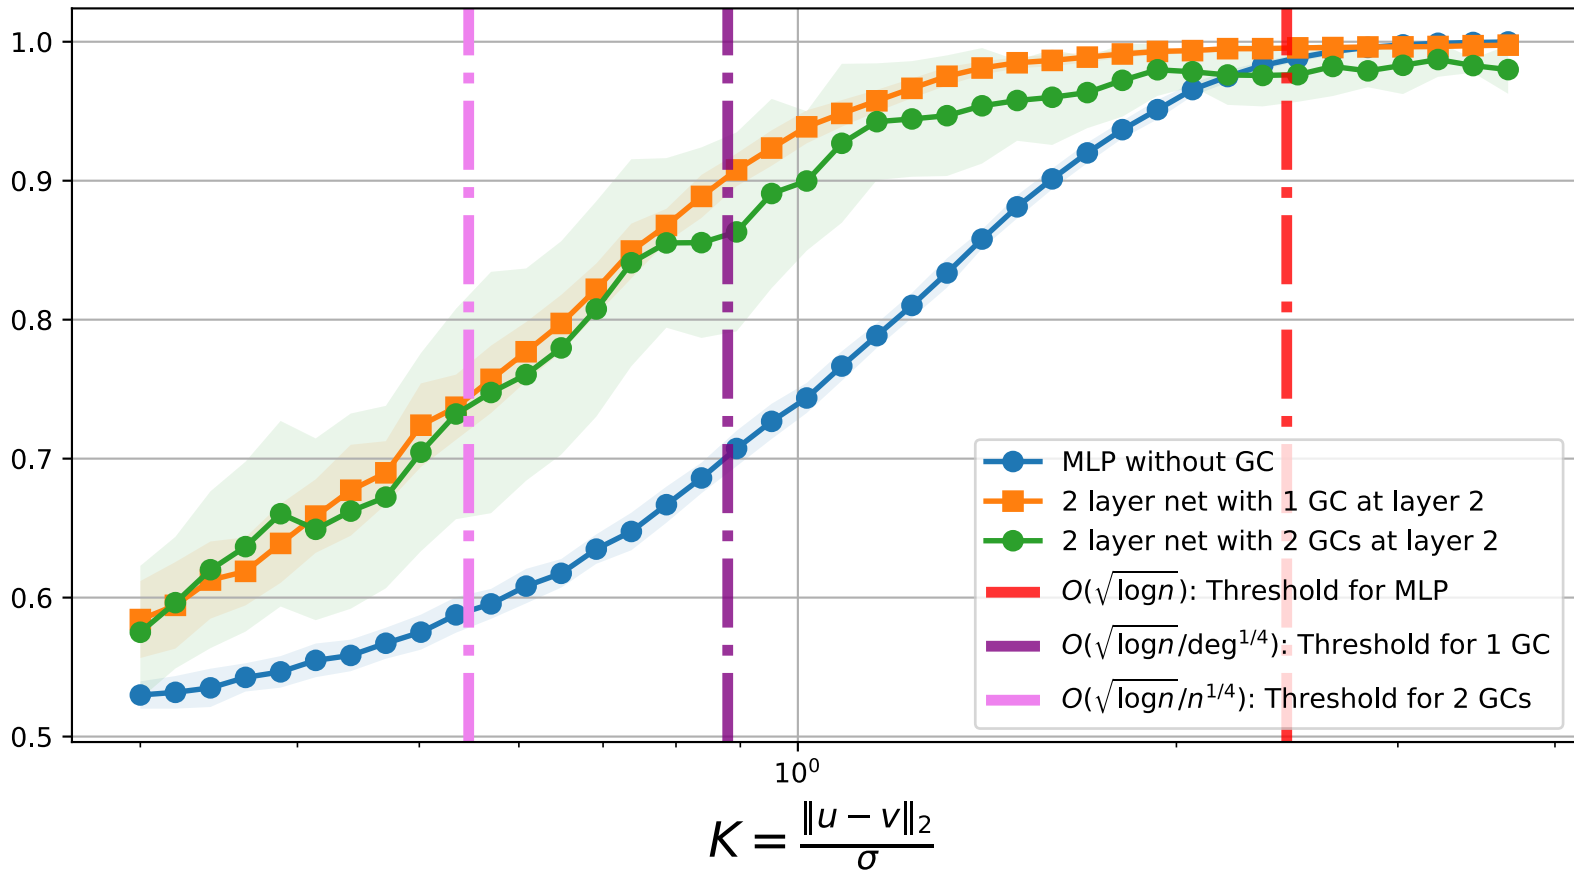

Supplement: supplementary_material [file attachment]

Test Accuracy

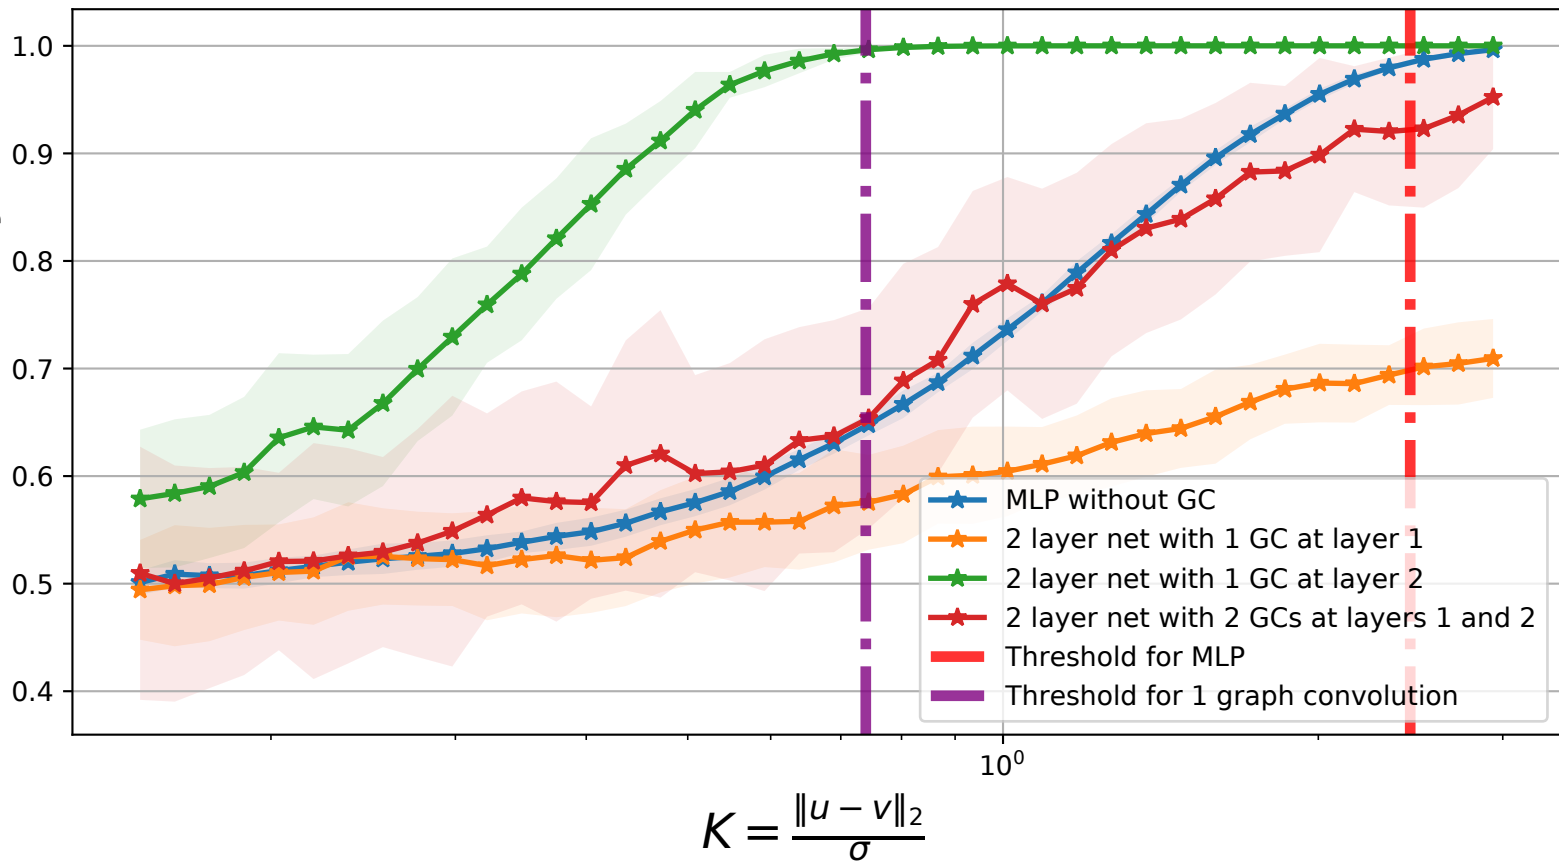

Supplement: supplementary_material [file attachment]

Test Accuracy

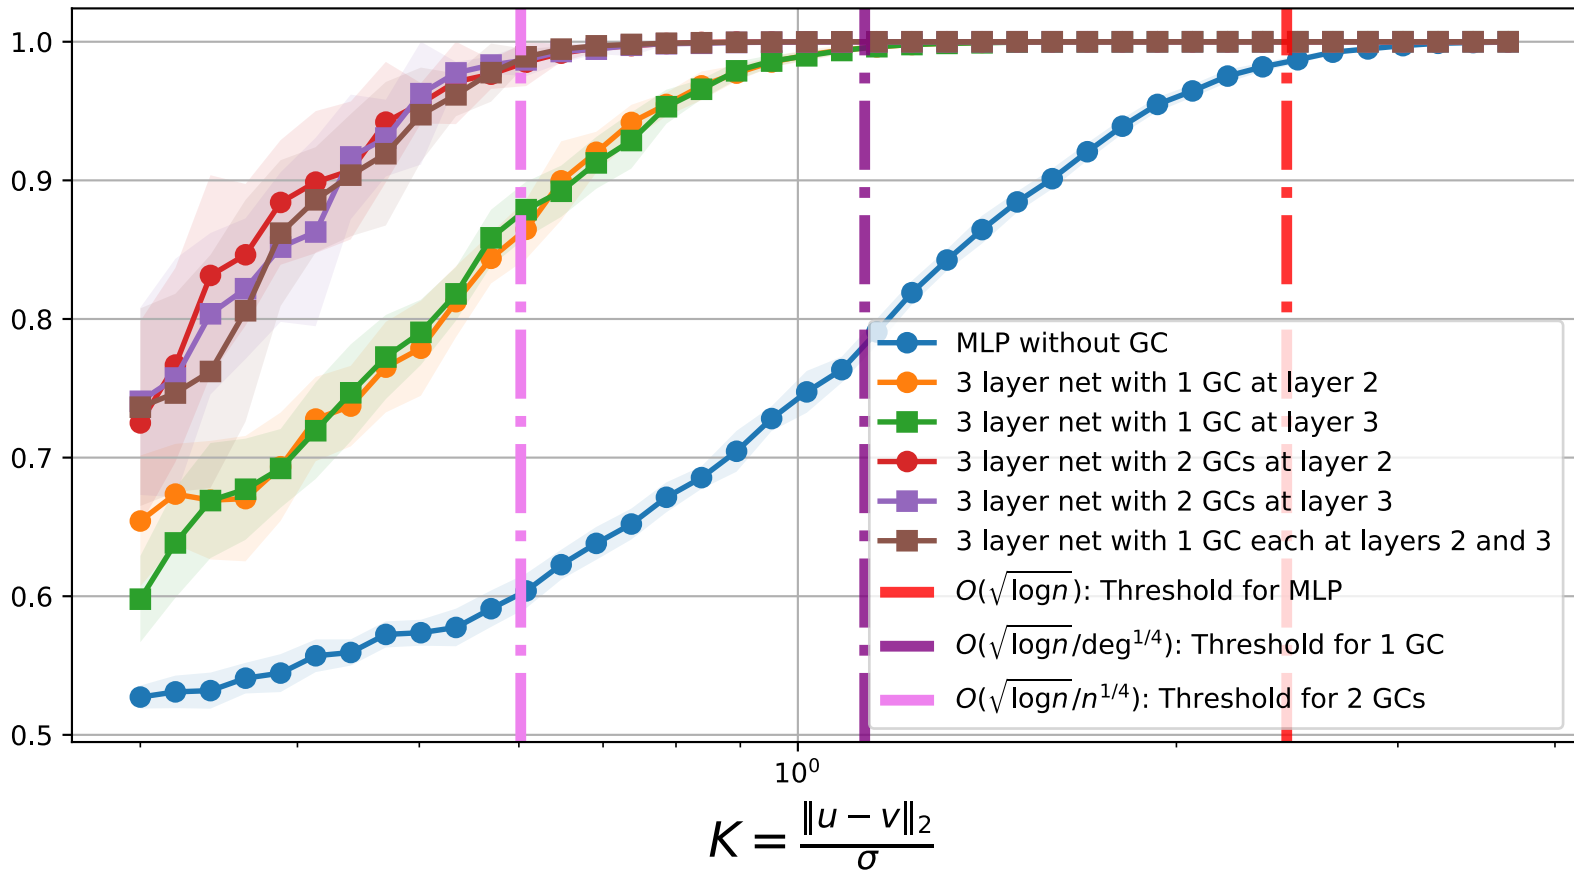

Supplement: supplementary_material [file attachment]

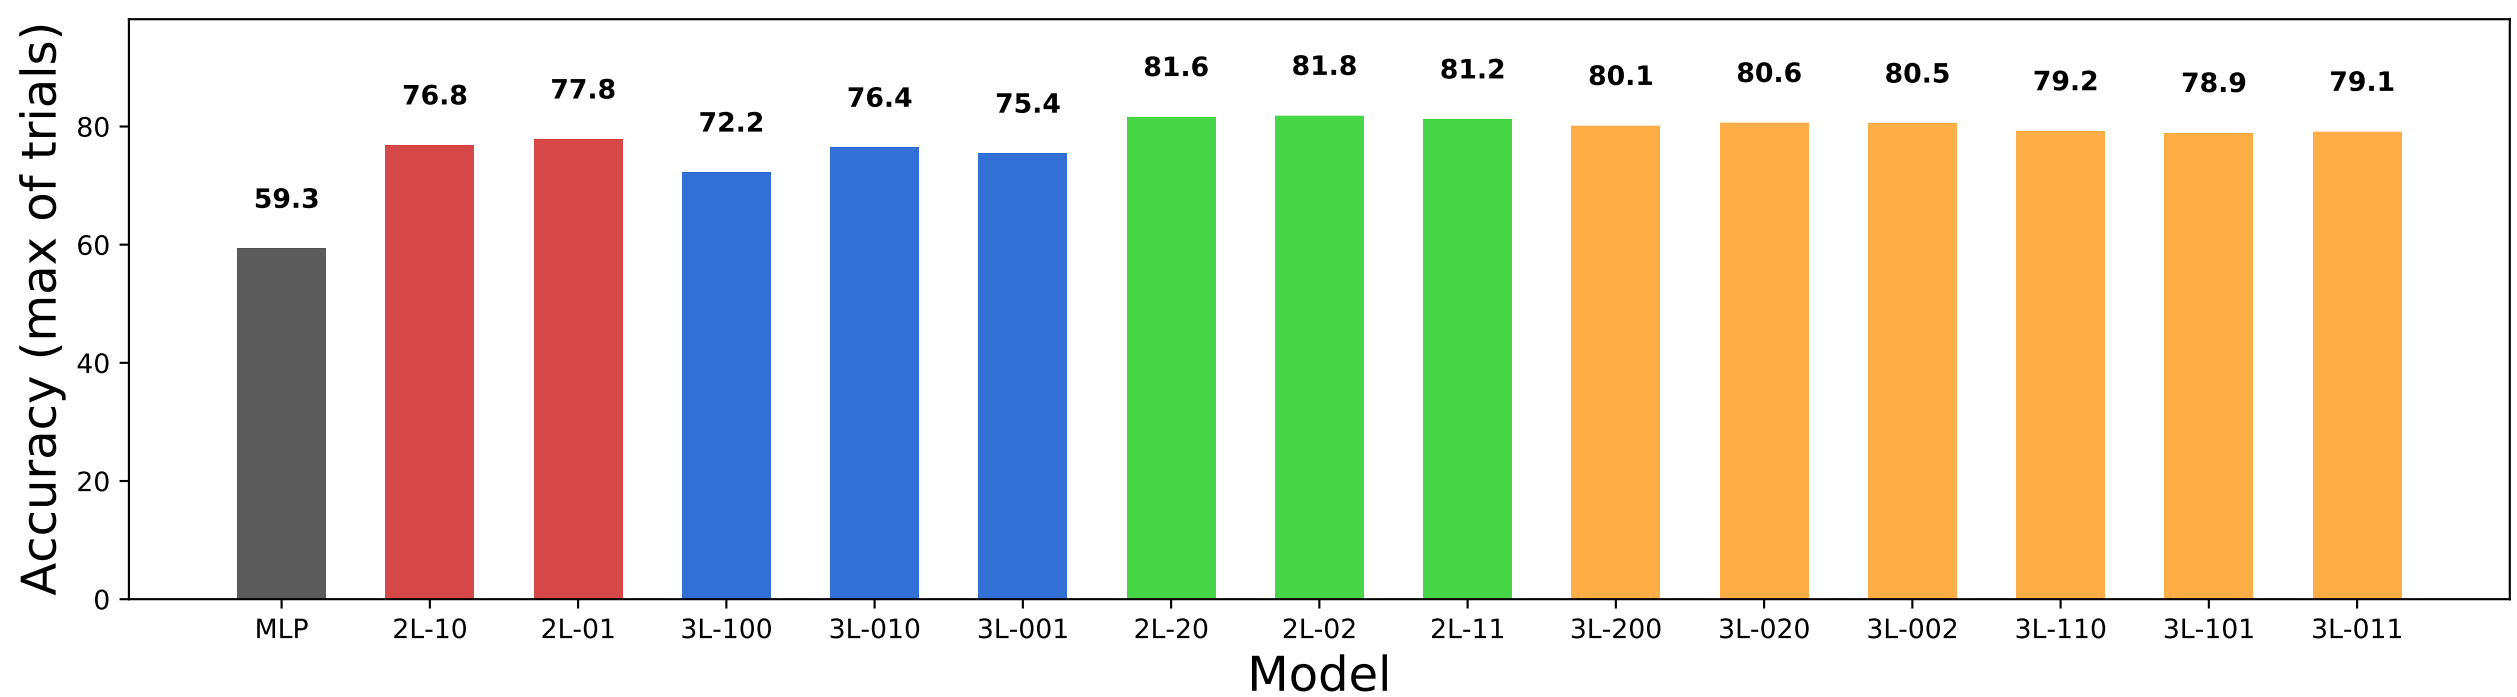

Supplement: supplementary_material [file attachment]

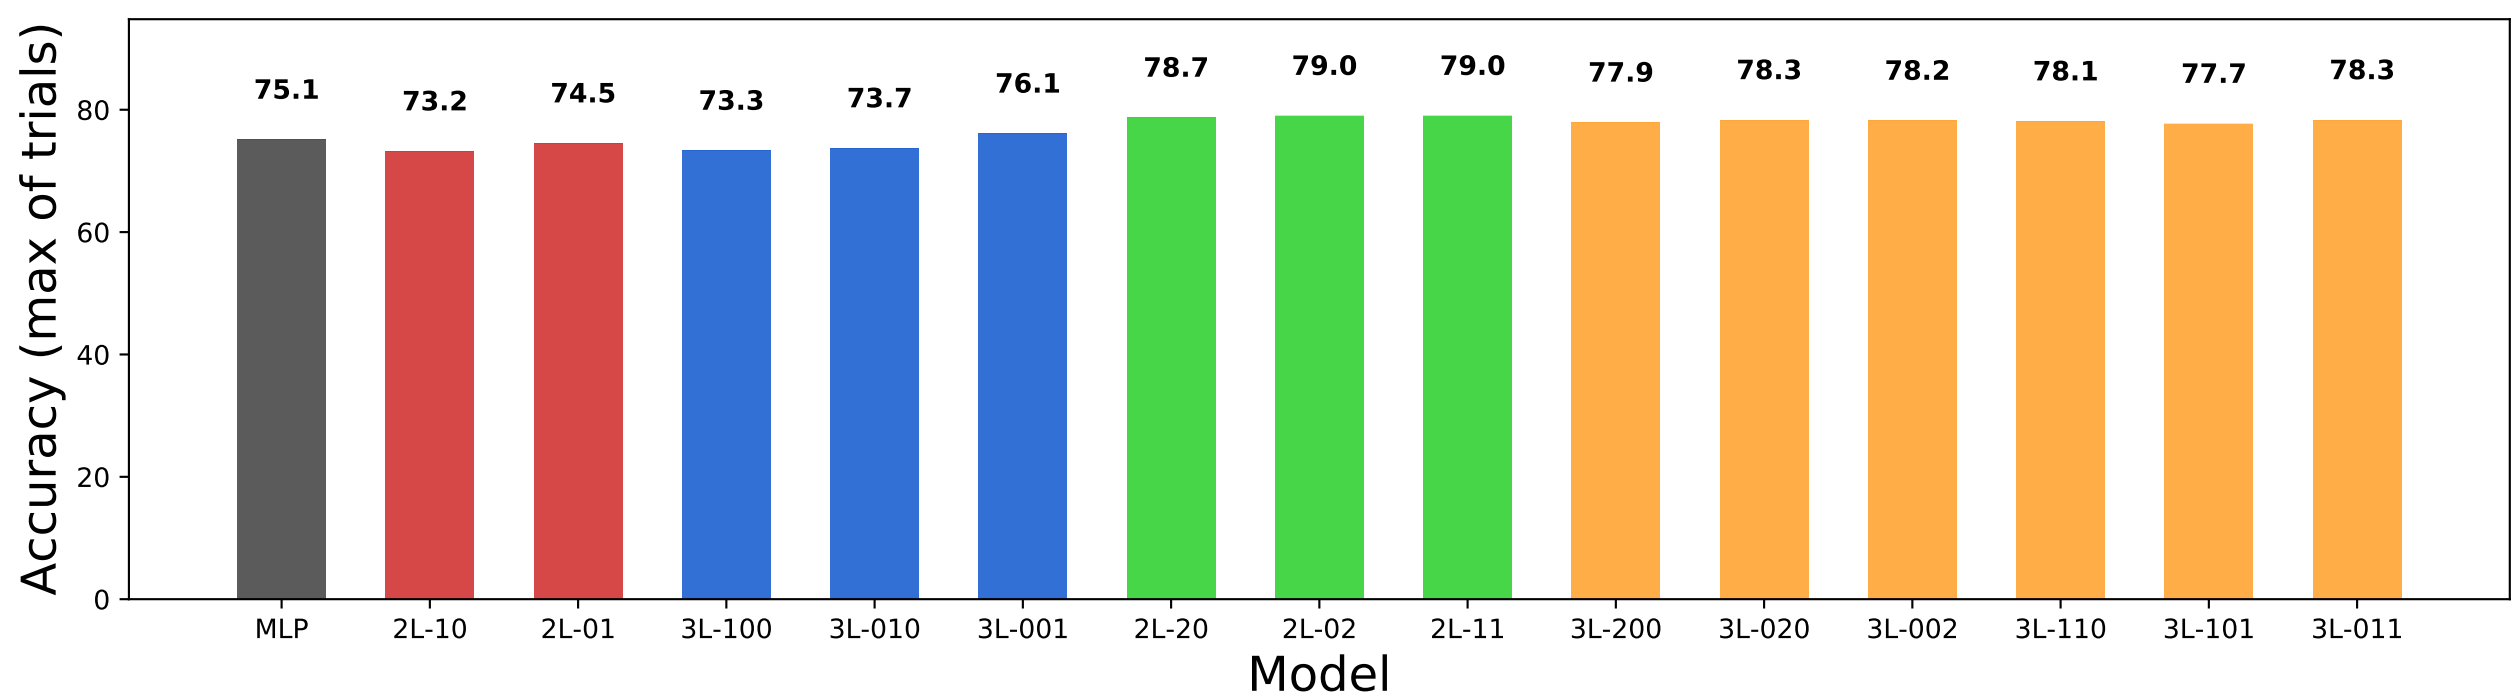

Supplement: supplementary_material [file attachment]

Test Accuracy

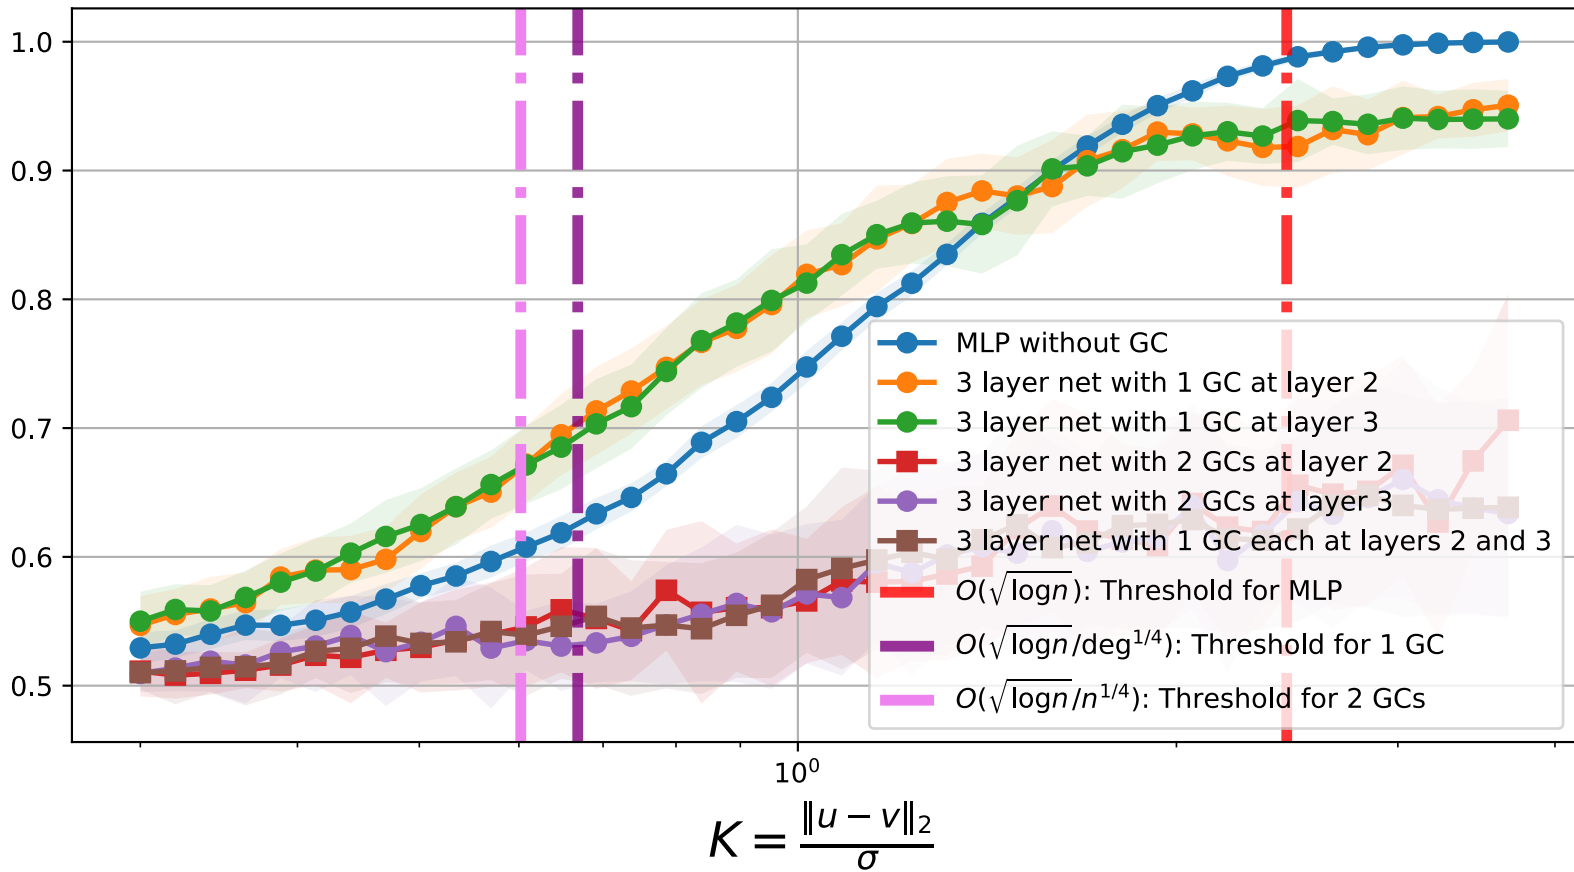

Supplement: supplementary_material [file attachment]

Test Accuracy

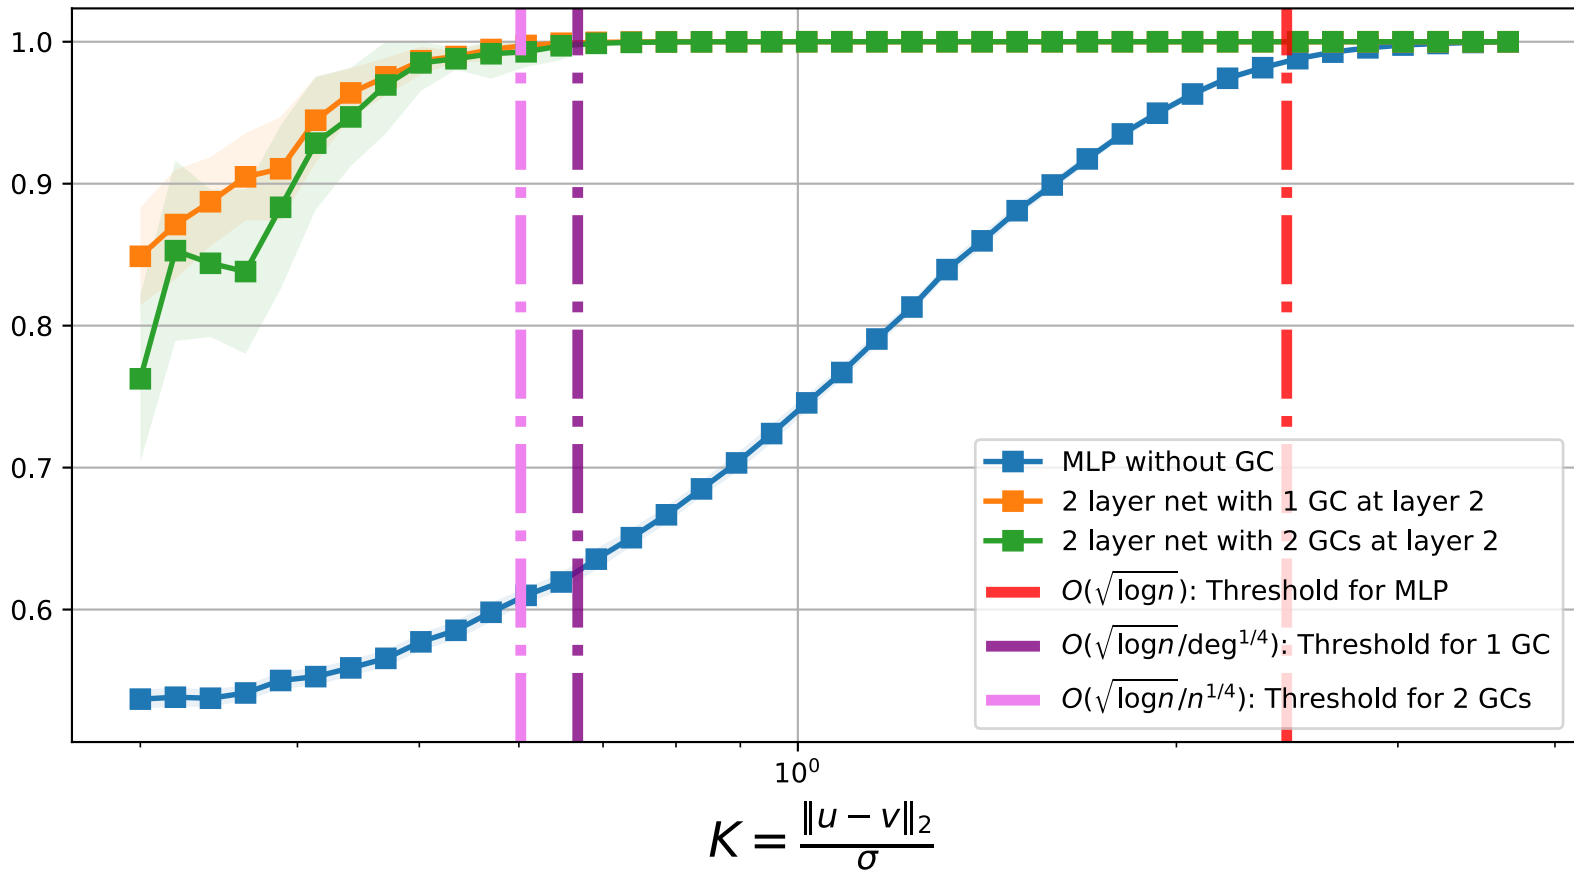

Supplement: supplementary_material [file attachment]

Test Loss

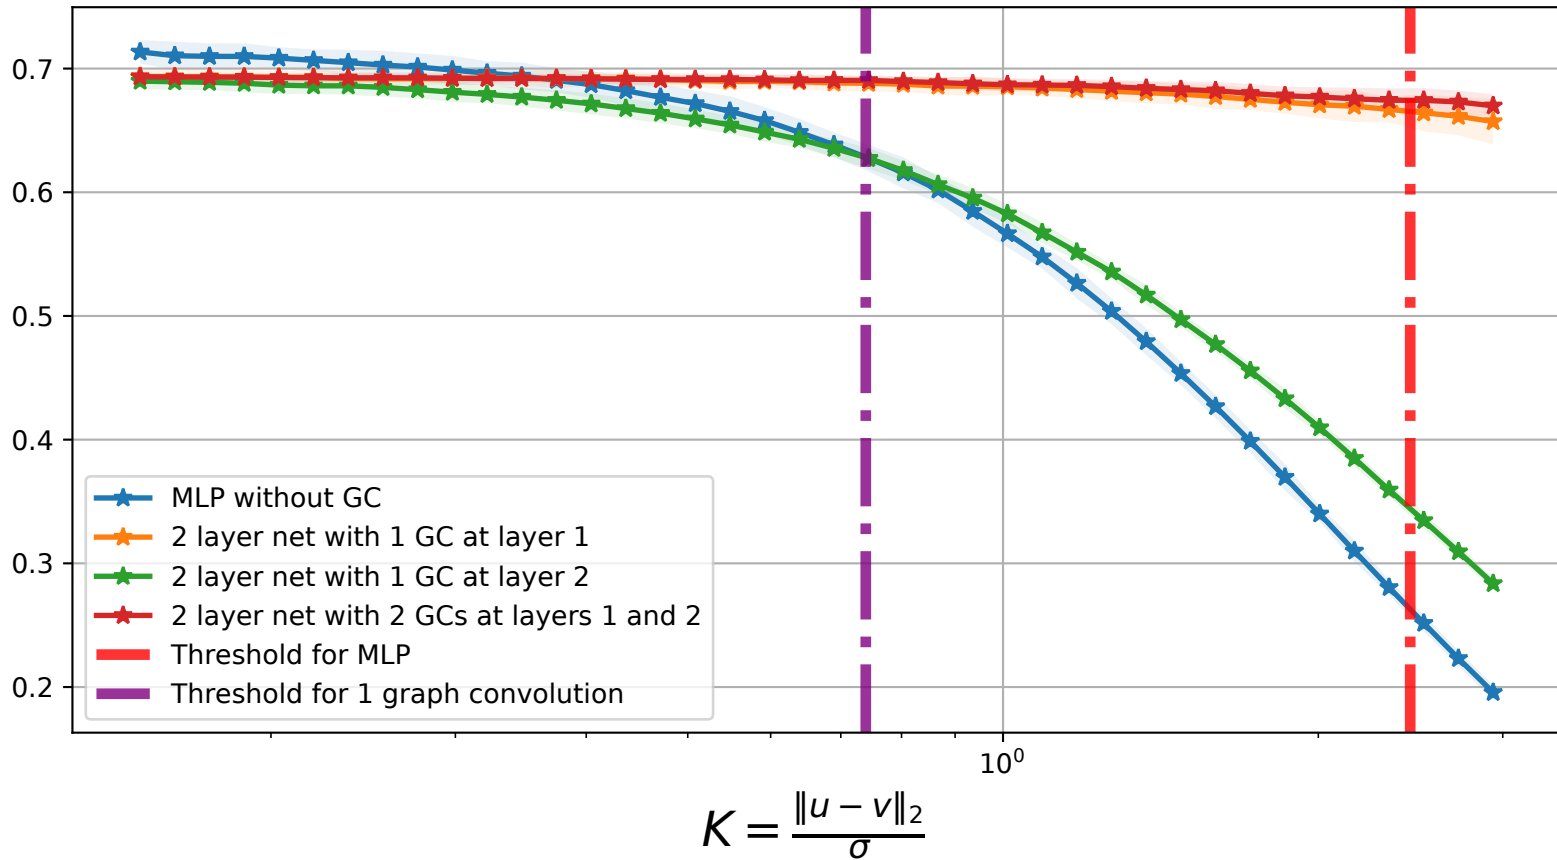

Supplement: supplementary_material [file attachment]

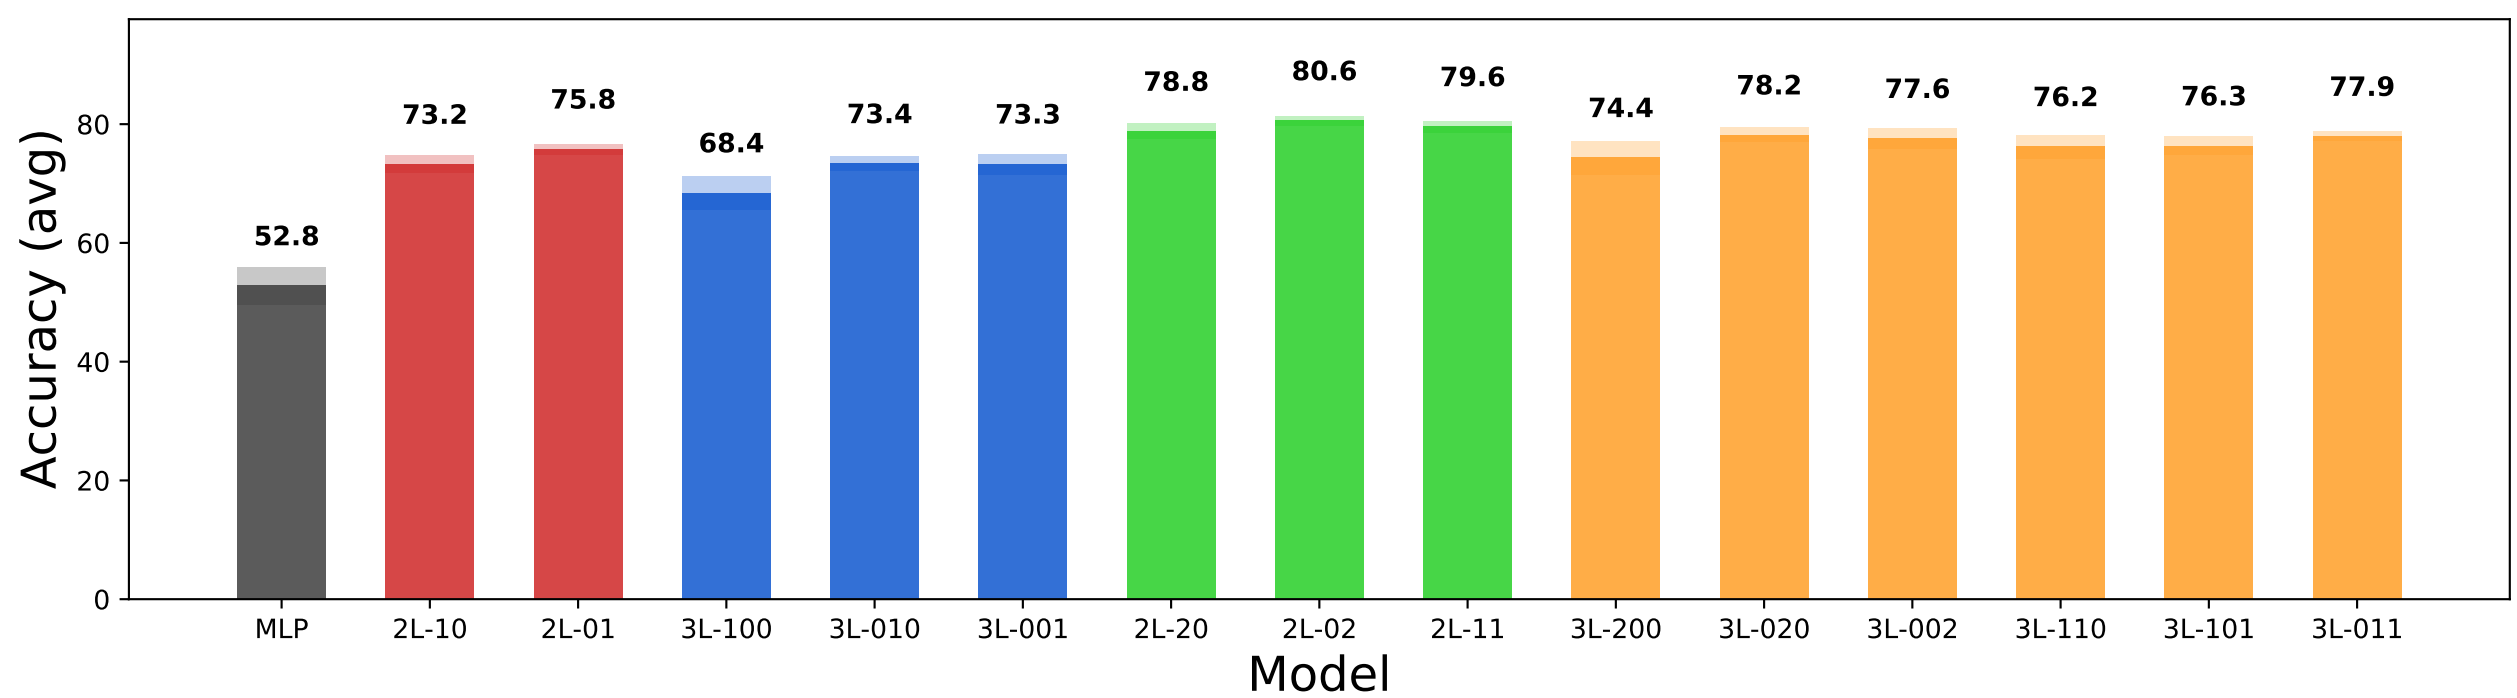

Supplement: supplementary_material [file attachment]

Test Accuracy

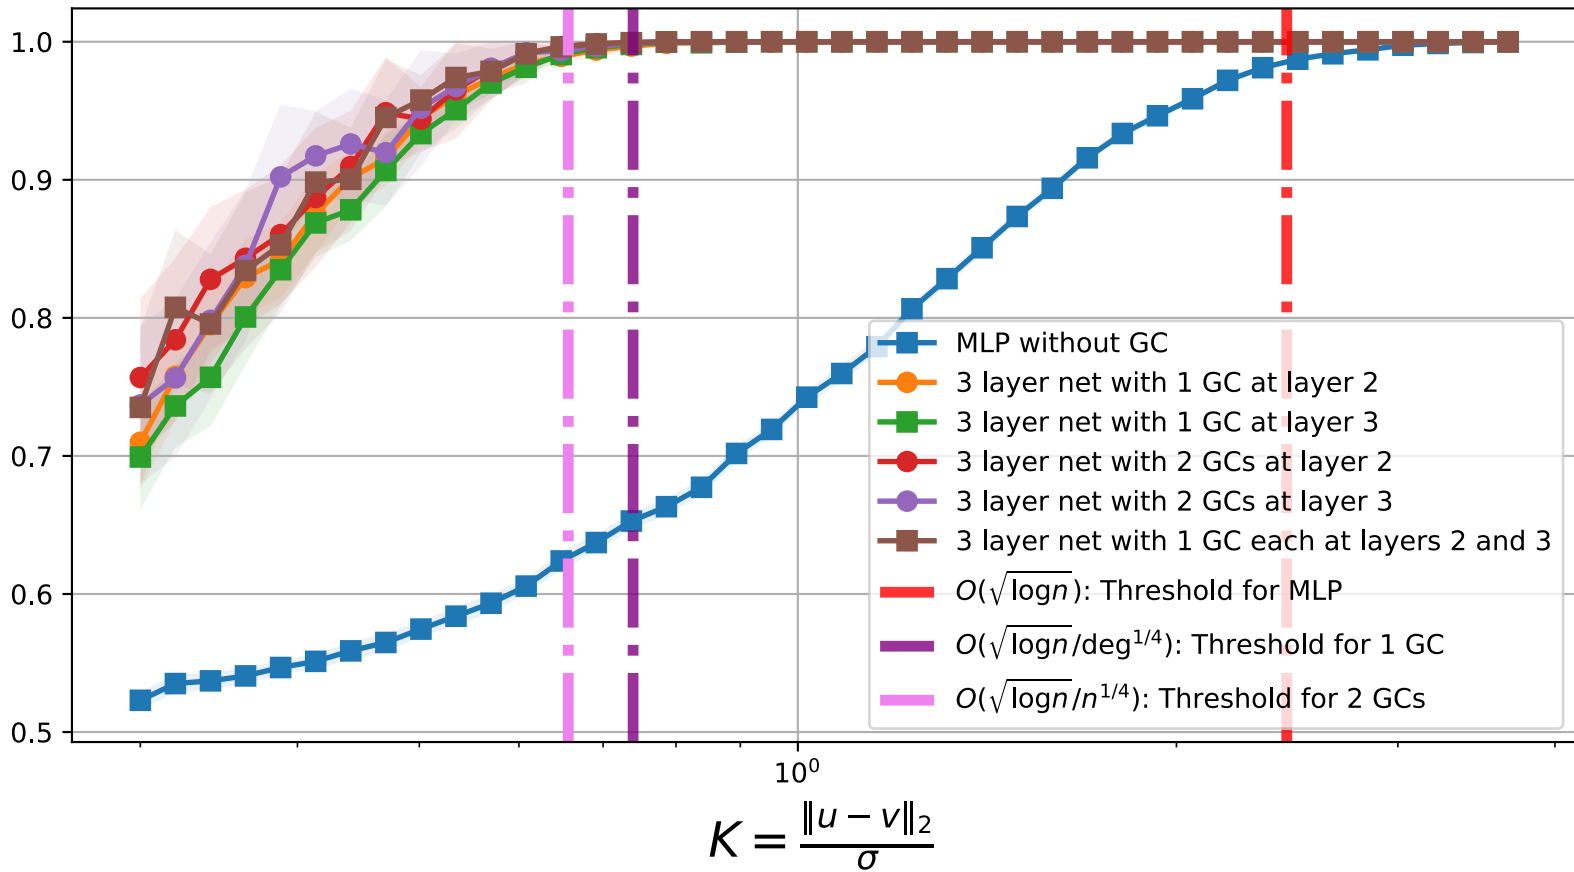

Supplement: supplementary_material [file attachment]

Test Accuracy

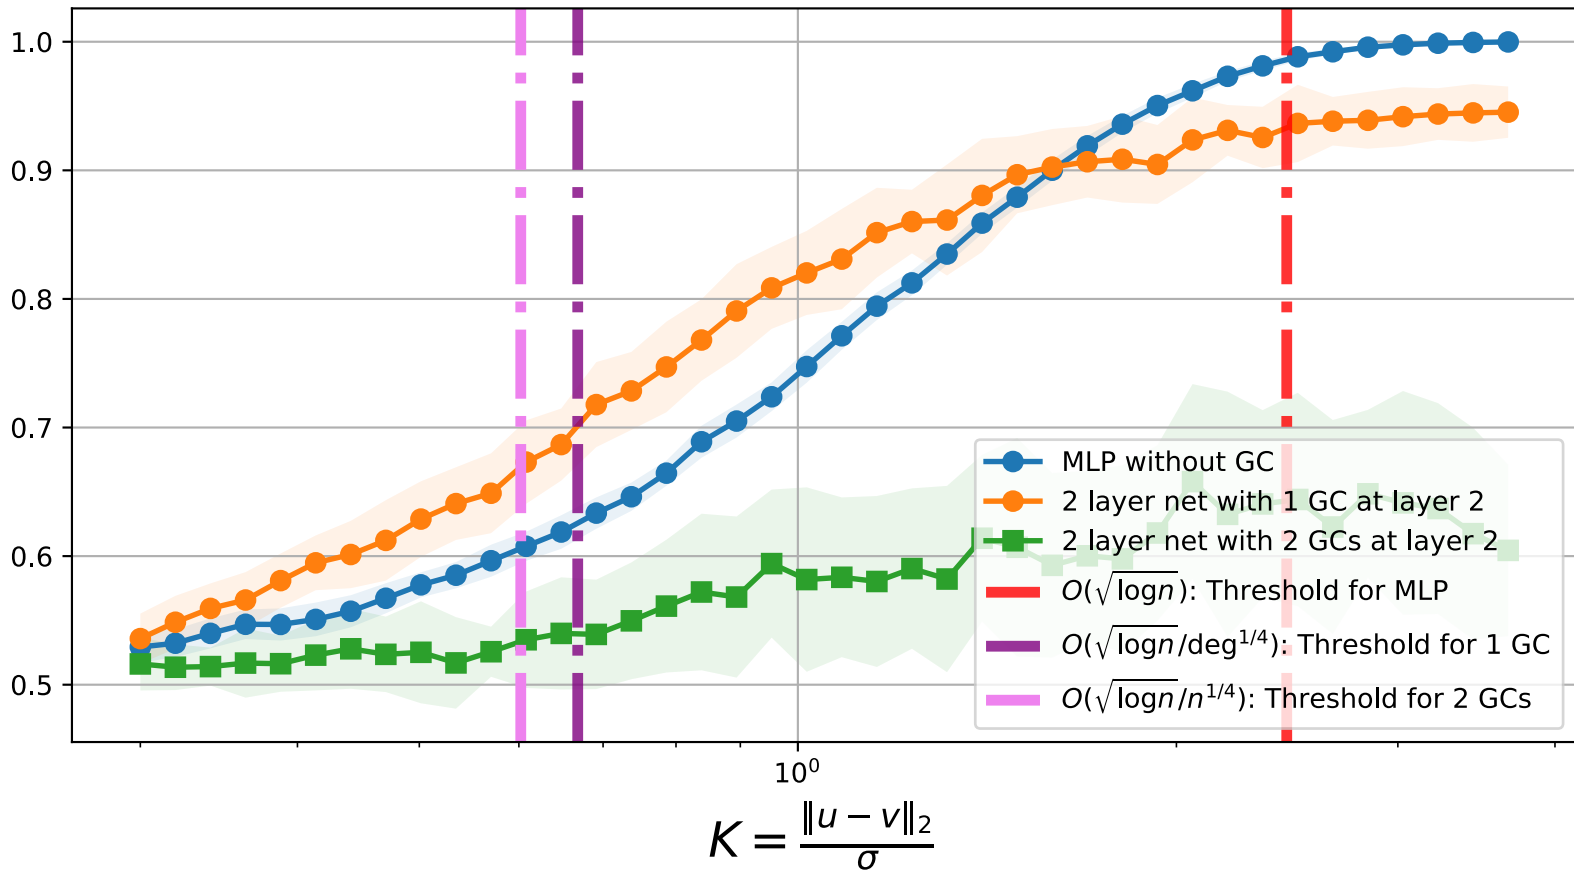

Supplement: supplementary_material [file attachment]

Test Accuracy

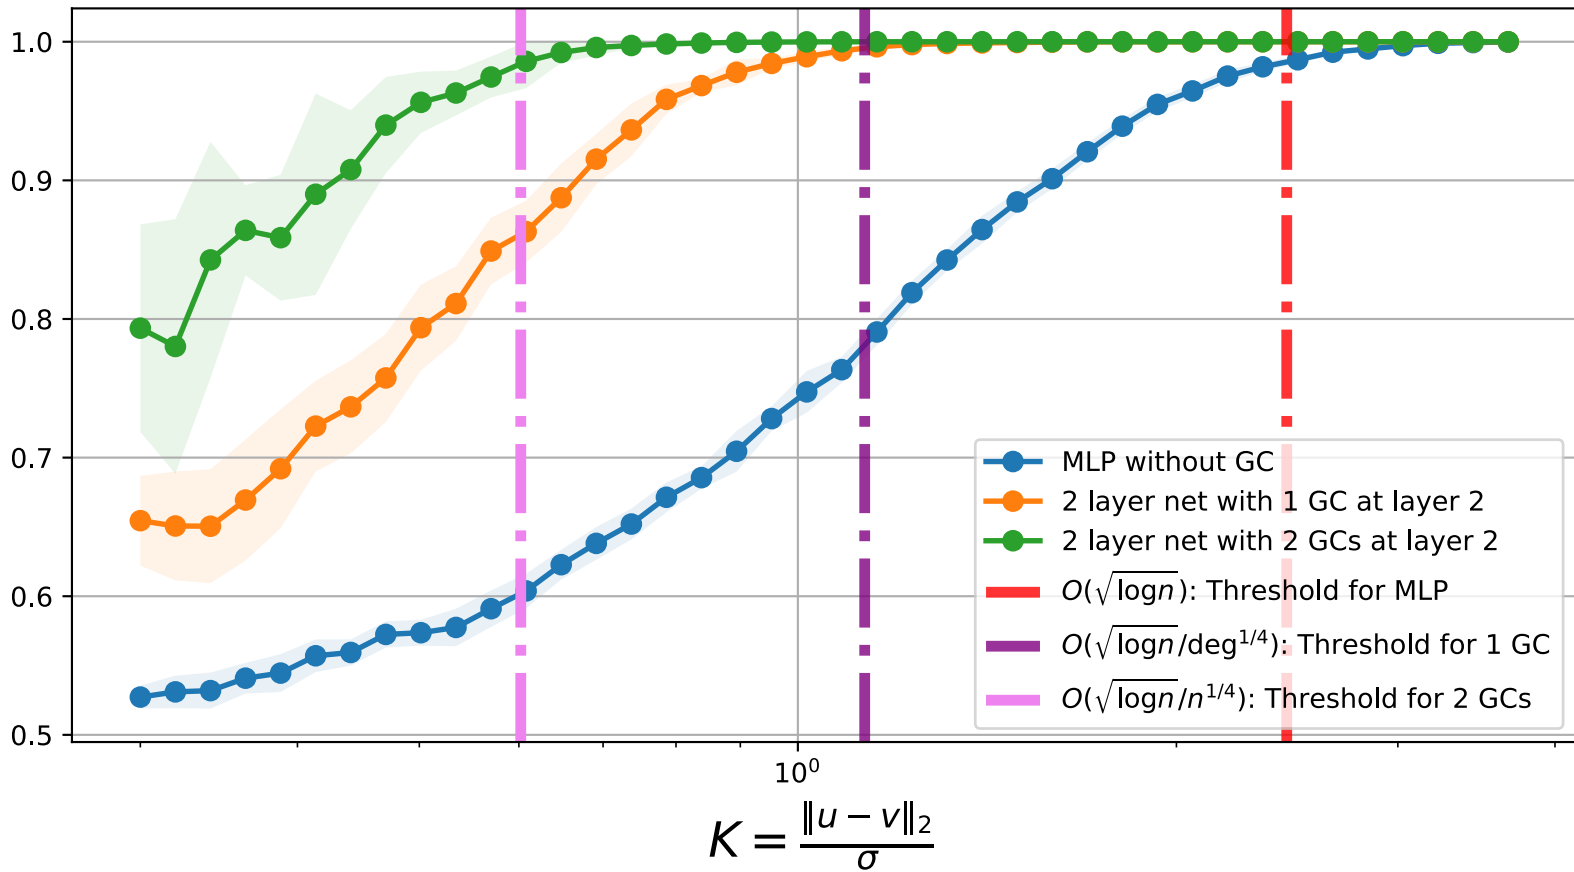

Supplement: supplementary_material [file attachment]

Accuracy (max)

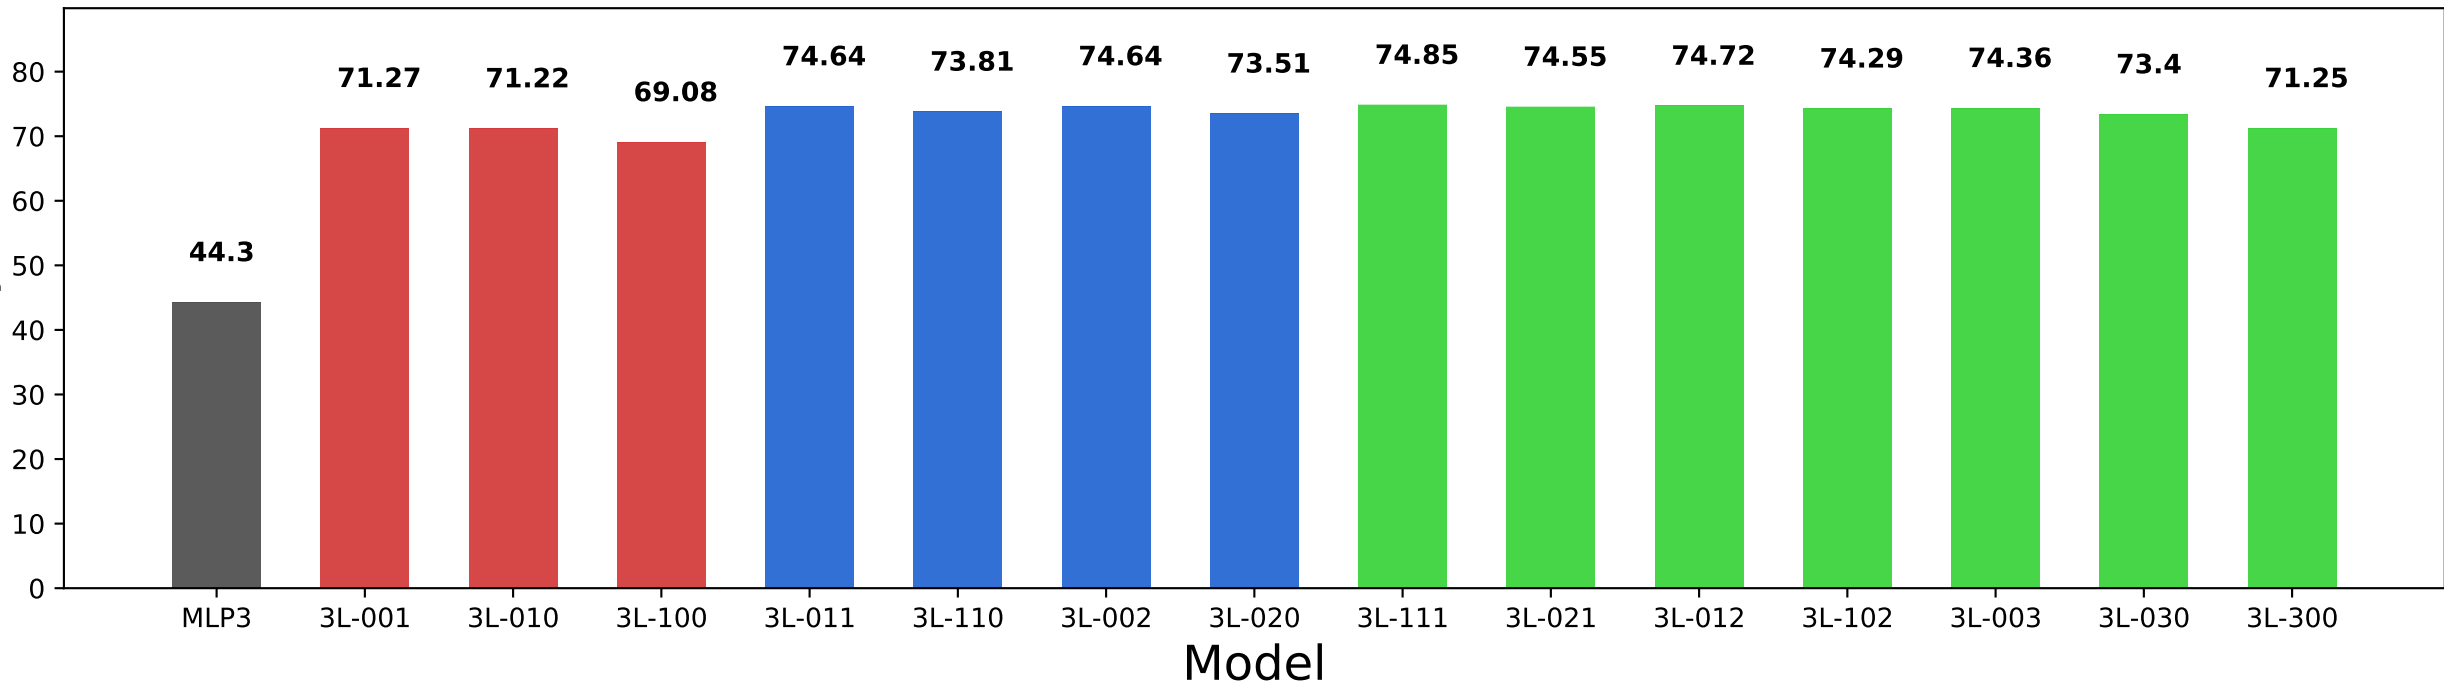

Supplement: supplementary_material [file attachment]

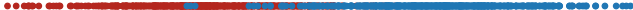

Supplement: supplementary_material [file attachment]

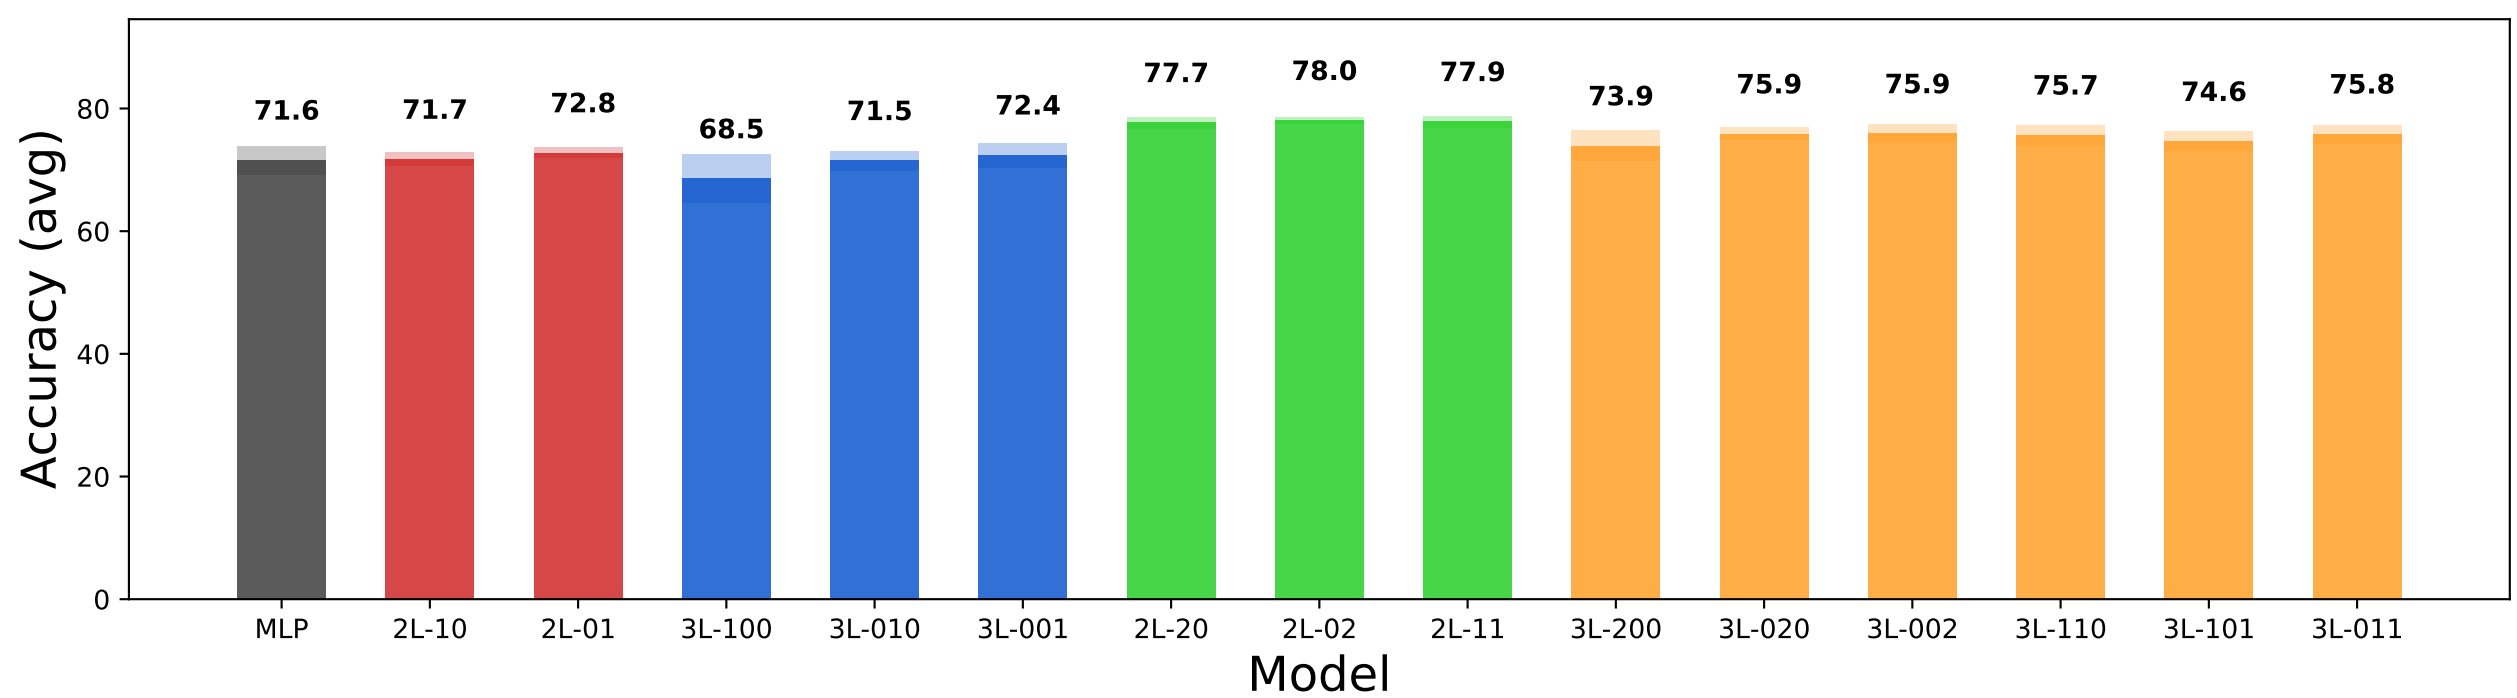

Supplement: supplementary_material [file attachment]

Accuracy (avg)

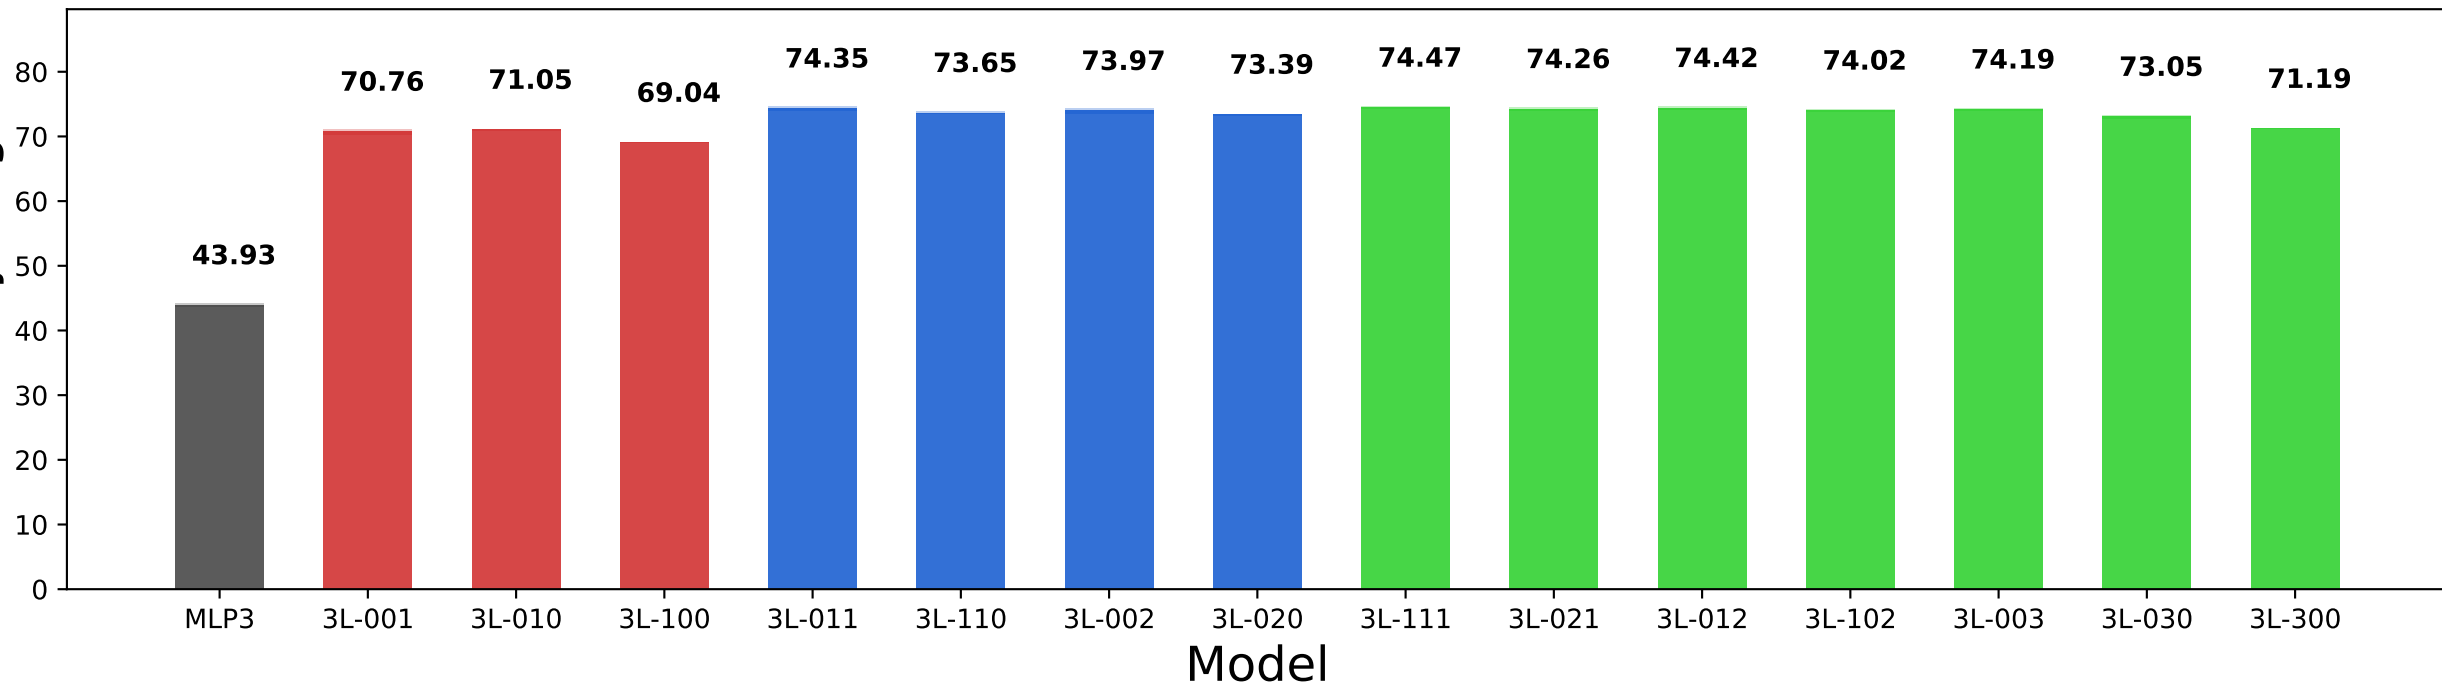

Supplement: supplementary_material [file attachment]

Test Accuracy

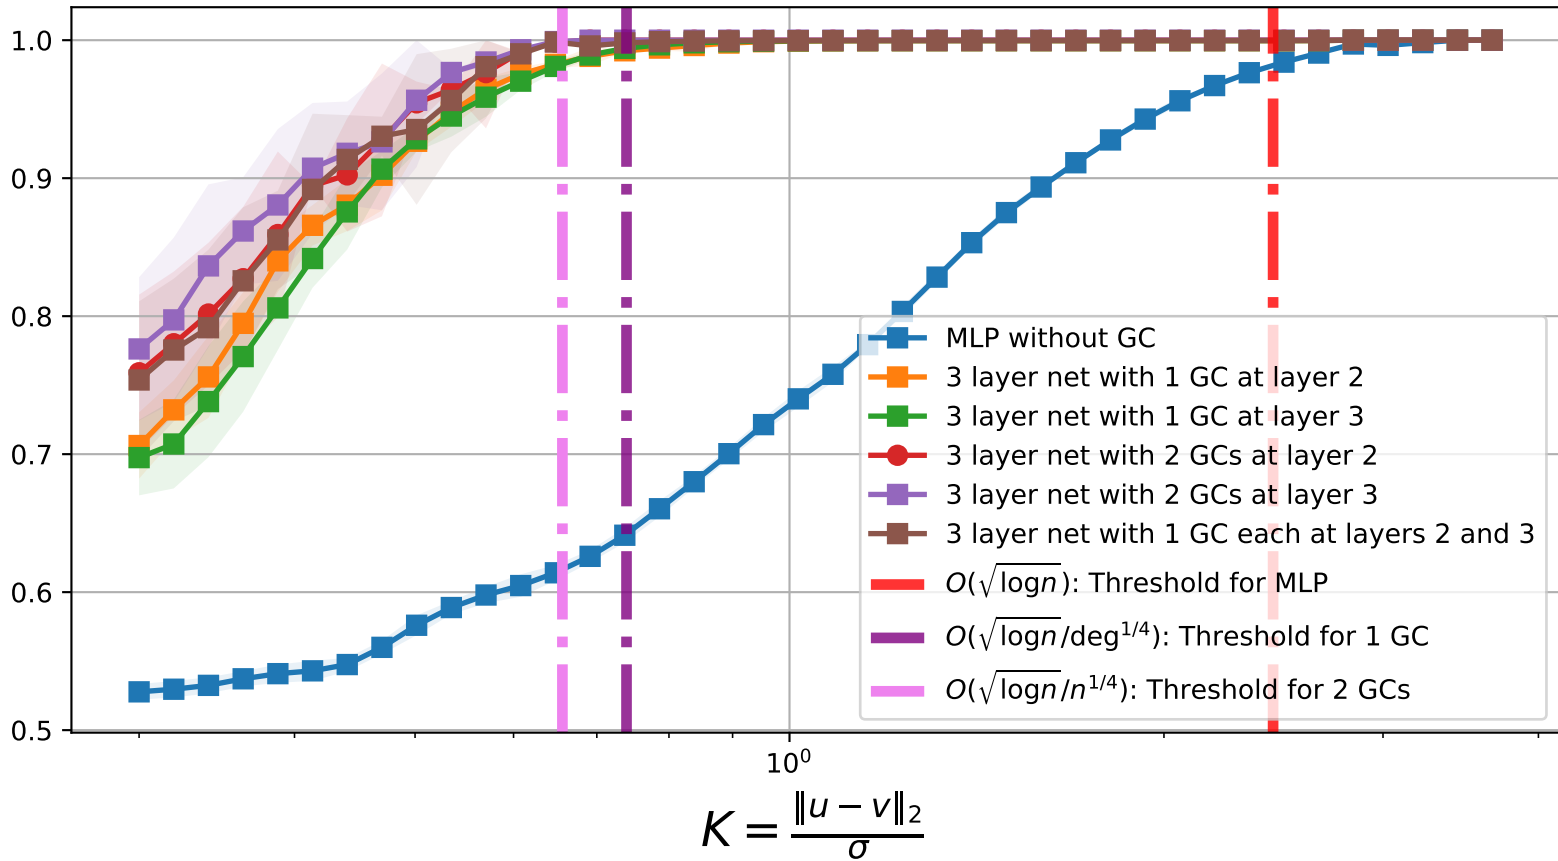

Supplement: supplementary_material [file attachment]

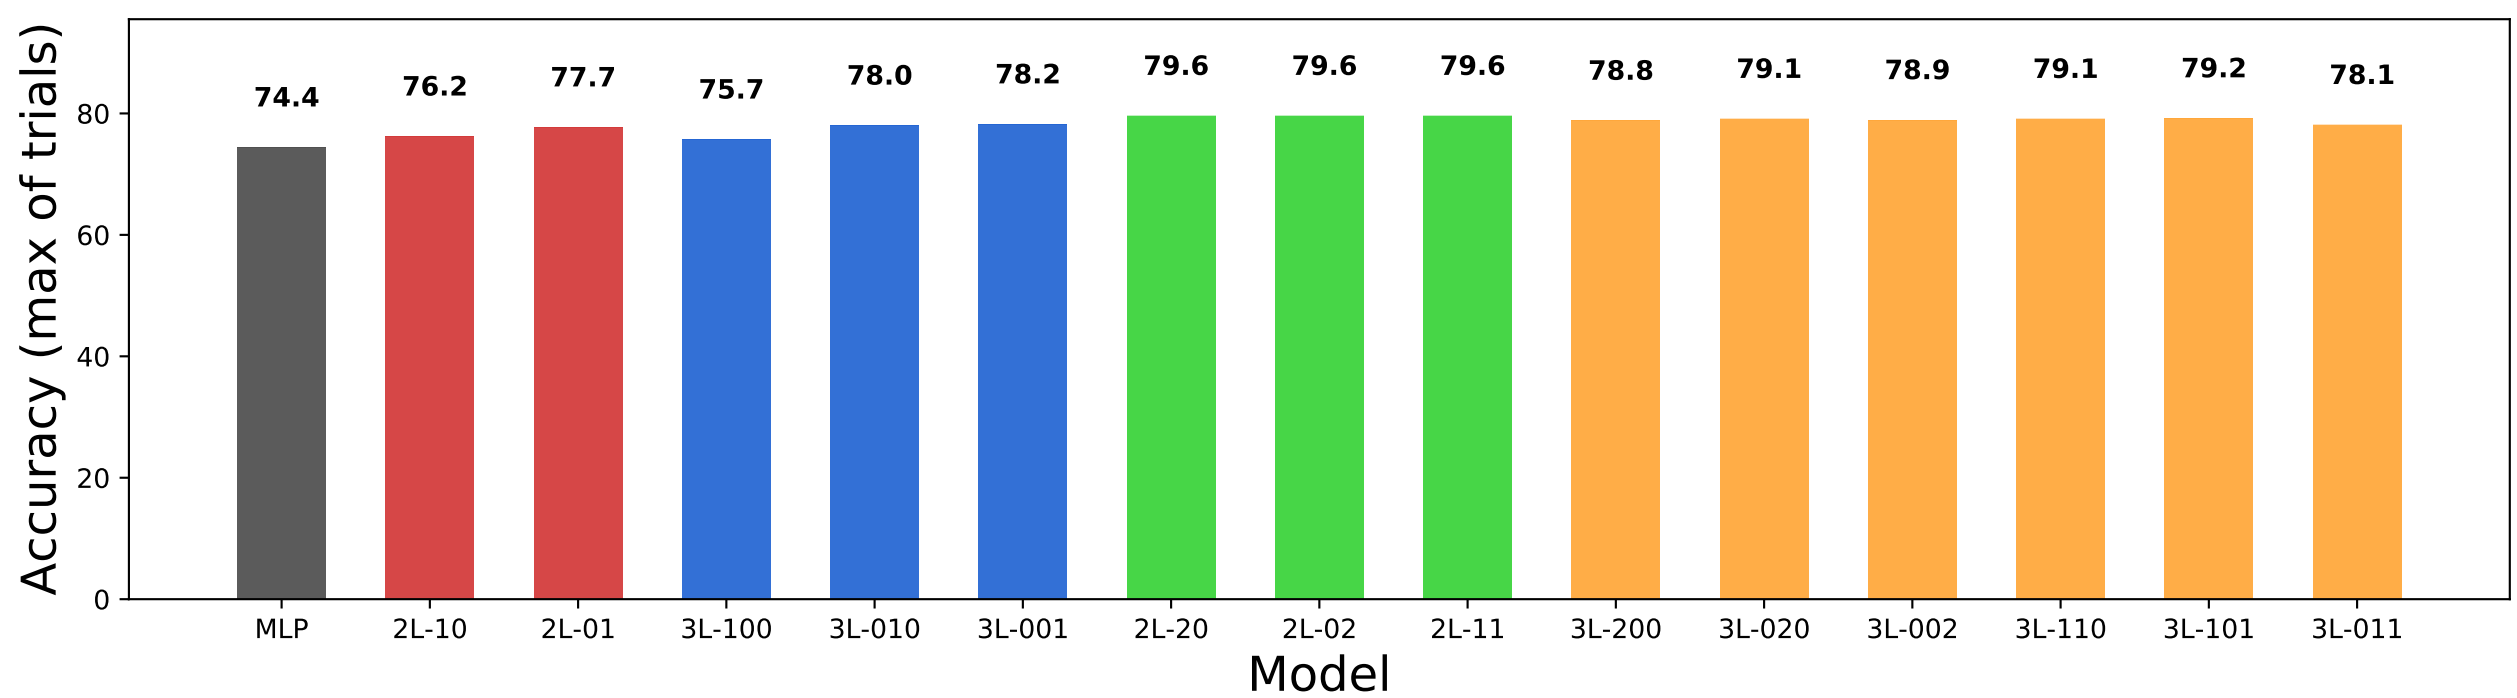

Supplement: supplementary_material [file attachment]

Test Accuracy

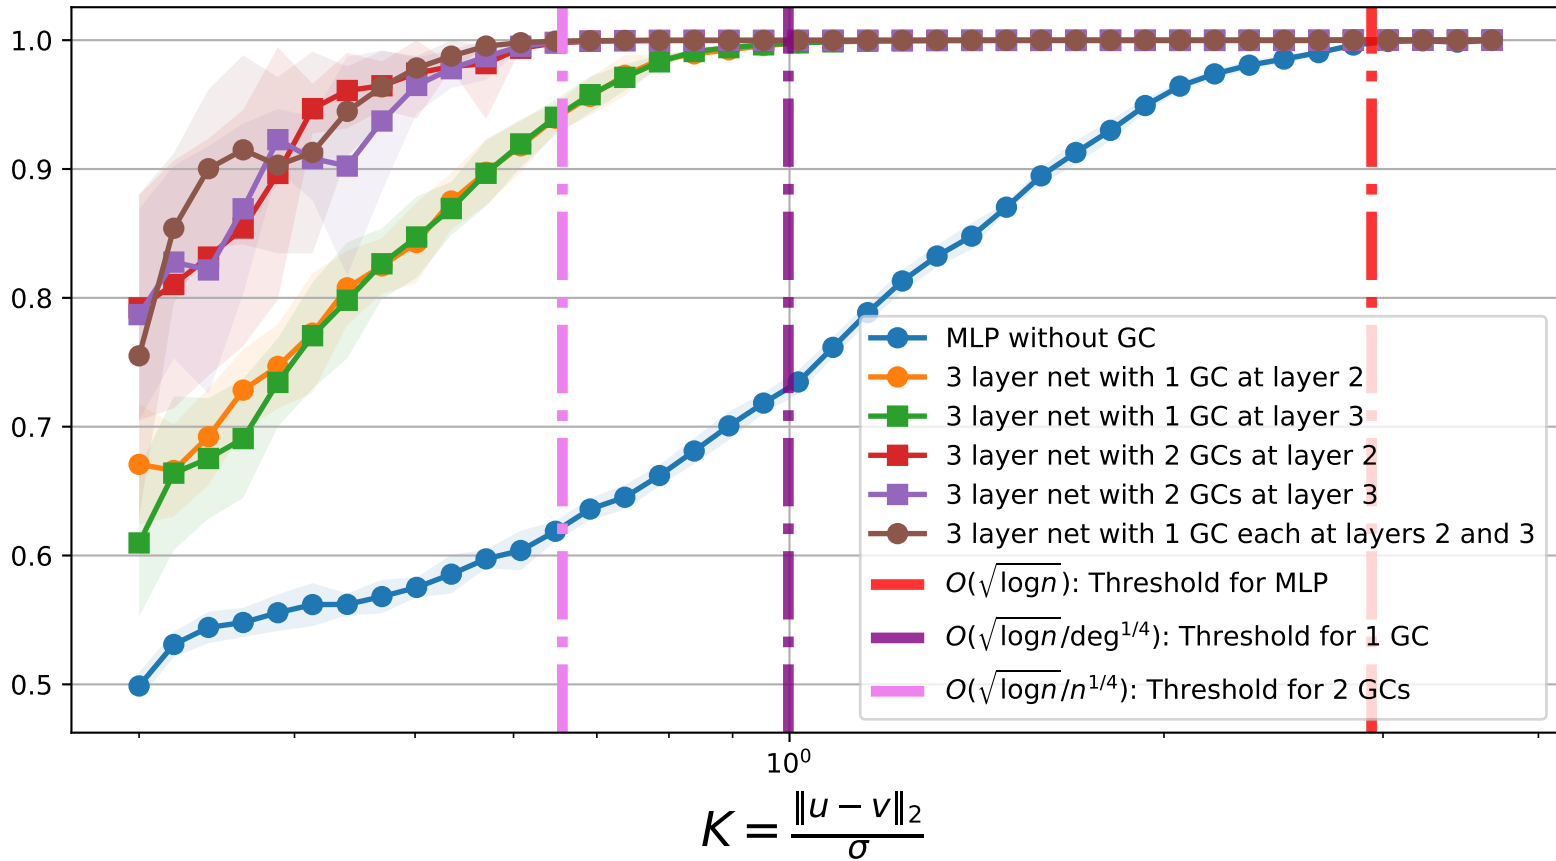

Supplement: supplementary_material [file attachment]

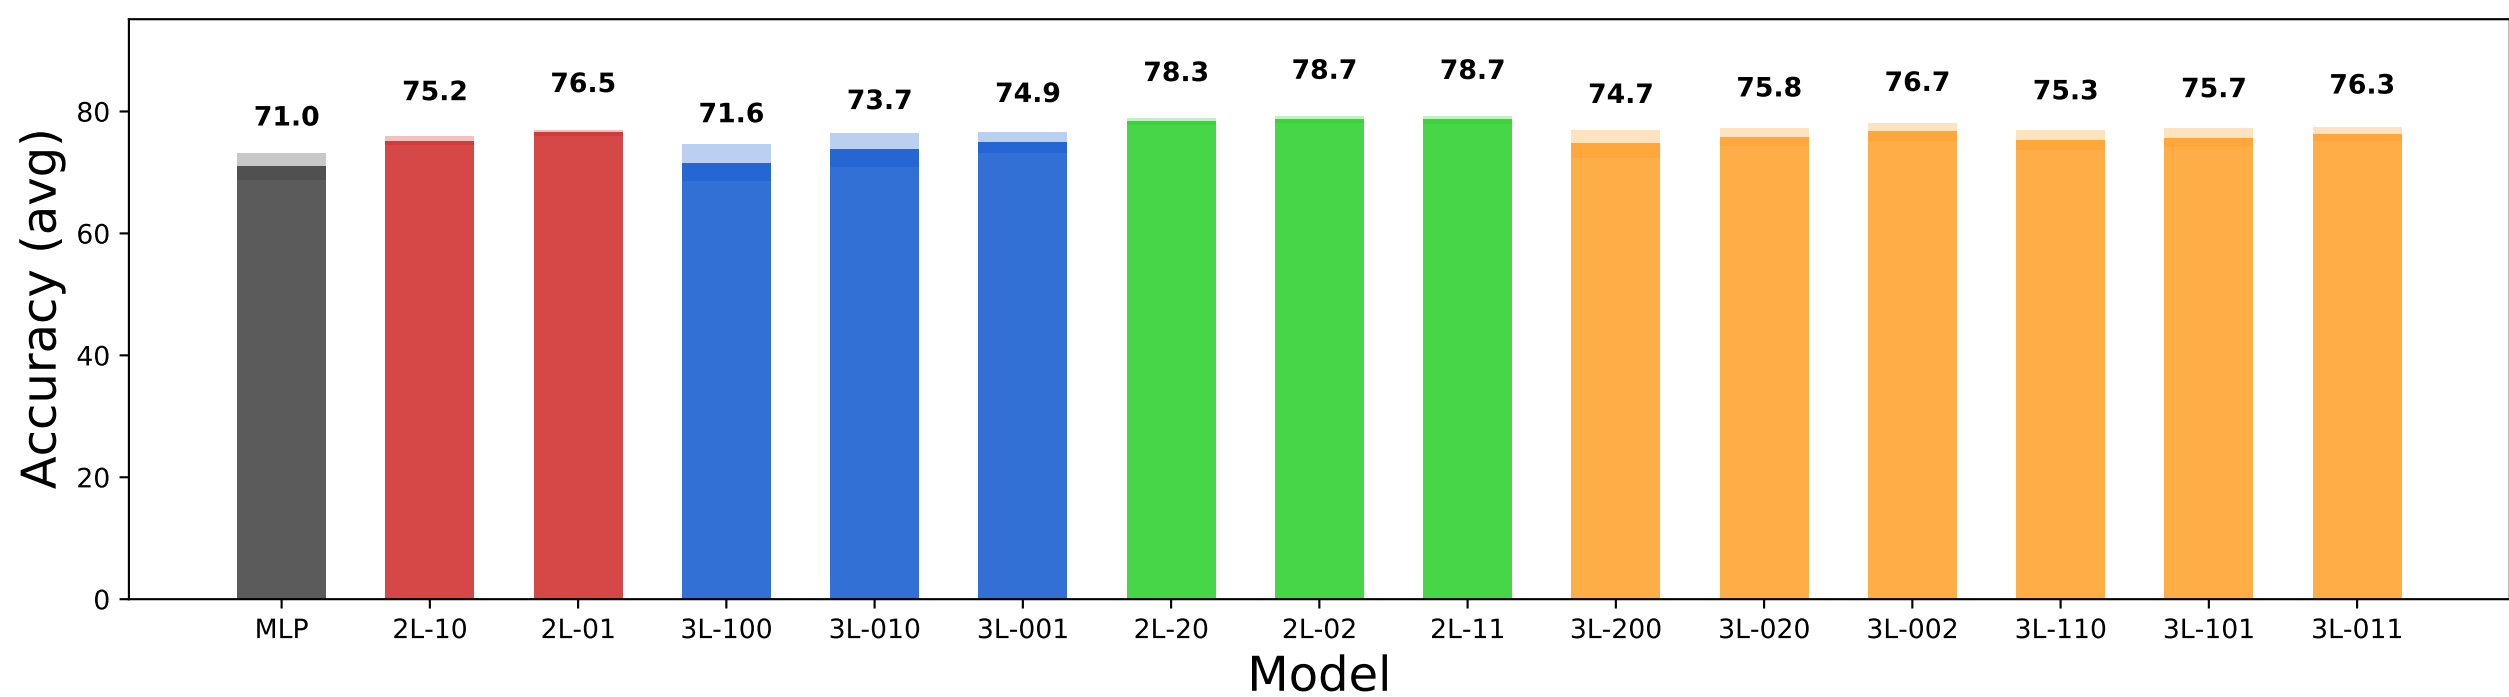

Supplement: supplementary_material [file attachment]

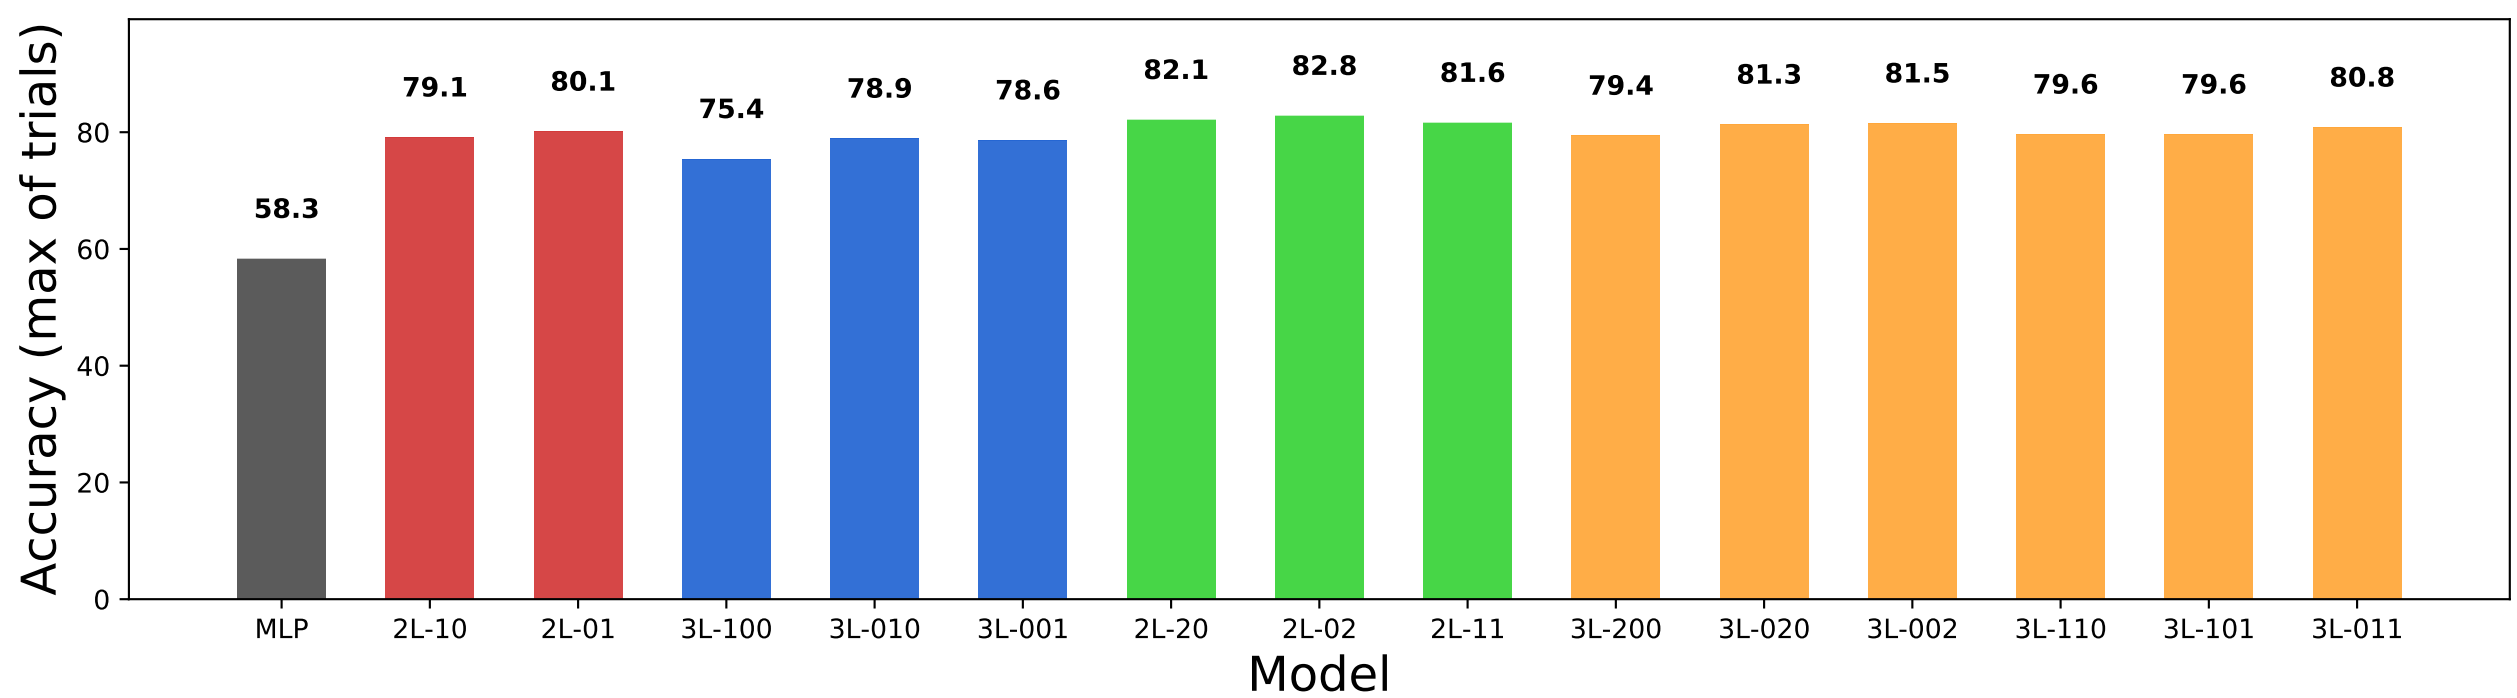

Supplement: supplementary_material [file attachment]

Accuracy (max)

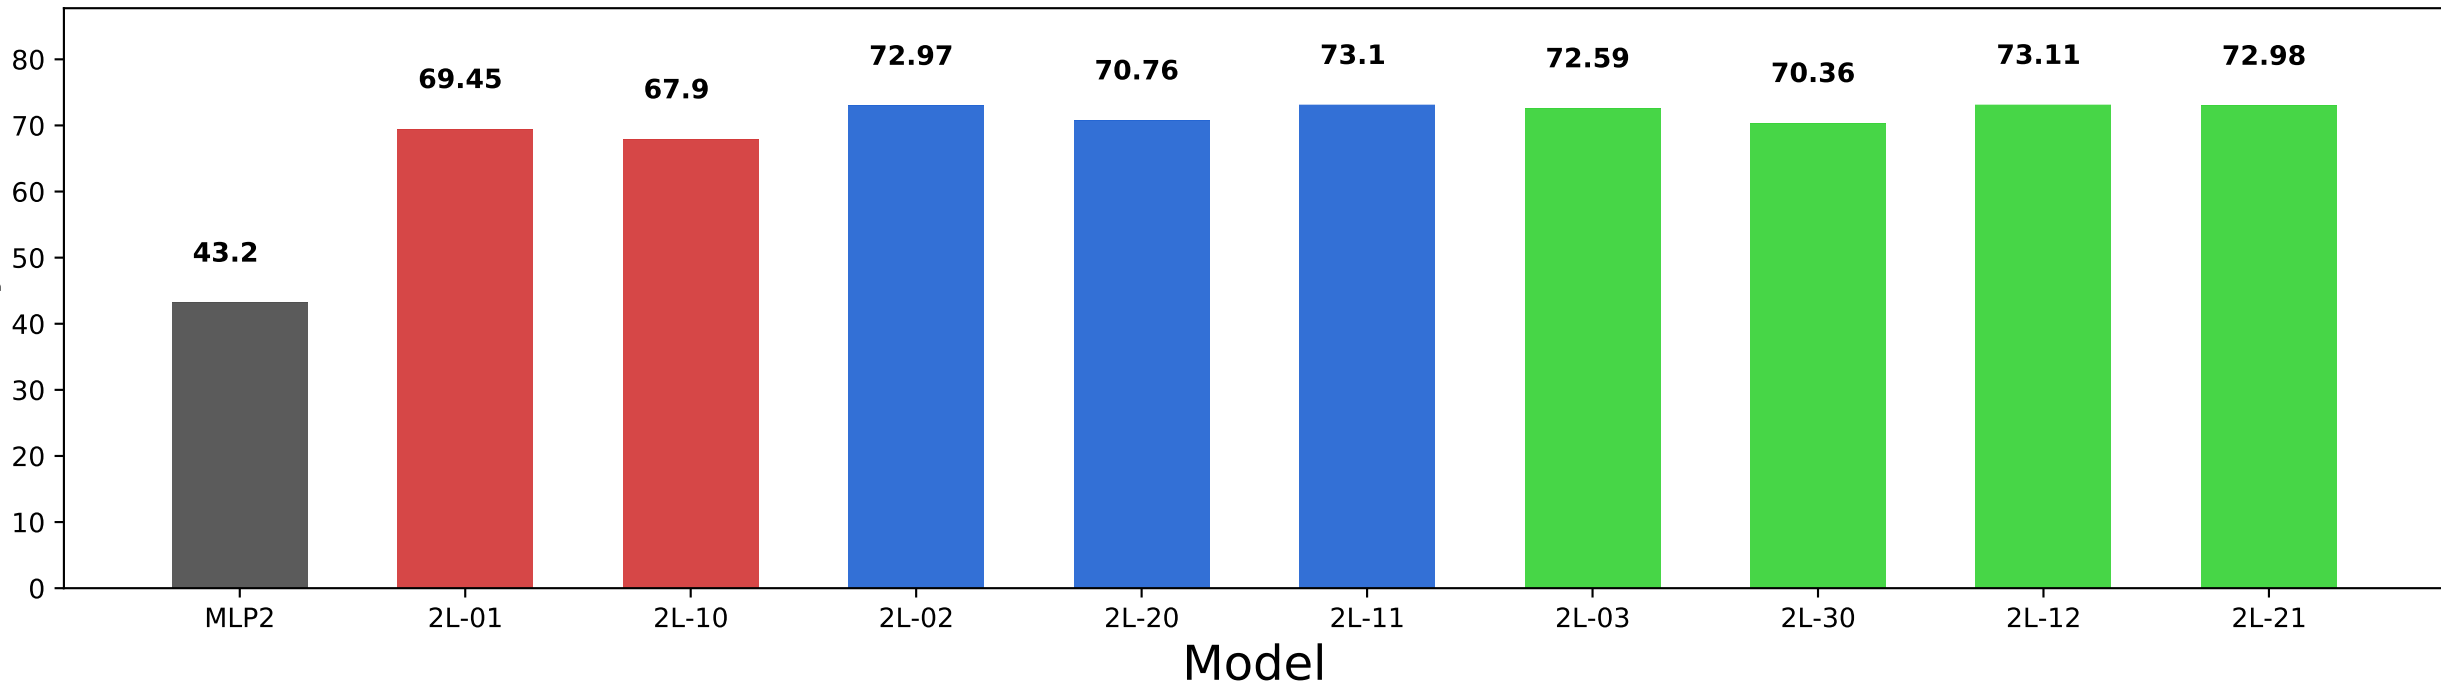

Supplement: supplementary_material [file attachment]

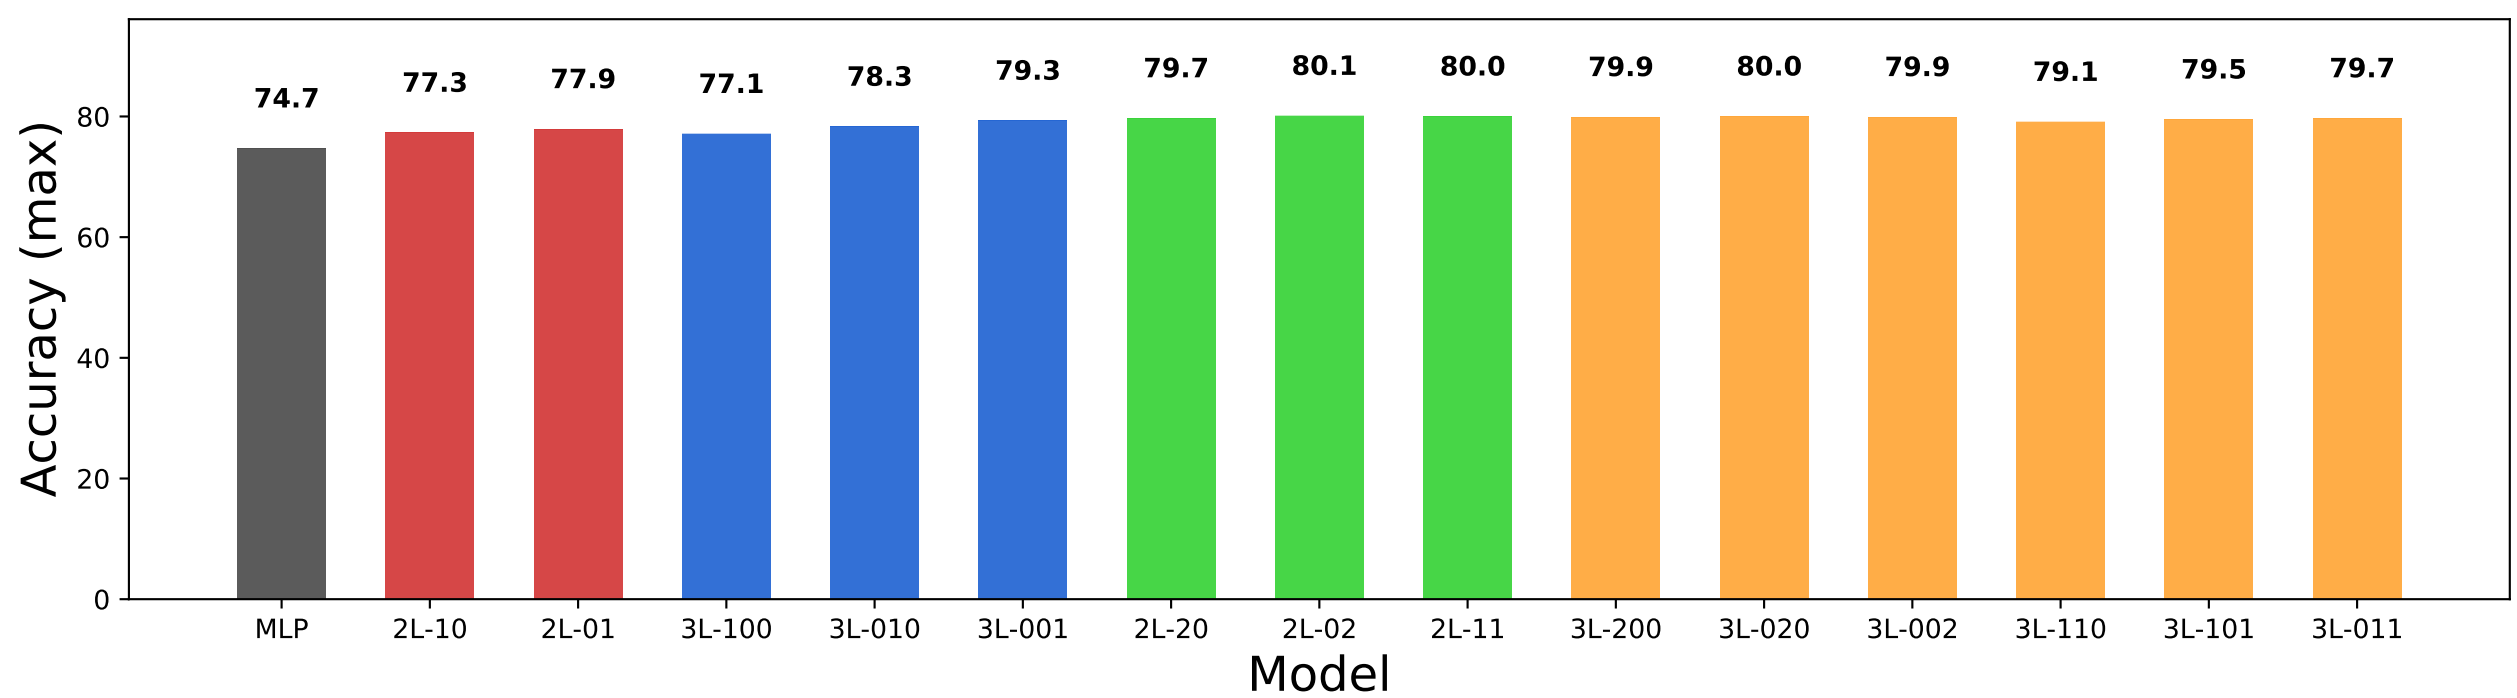

Supplement: supplementary_material [file attachment]

Accuracy (avg)

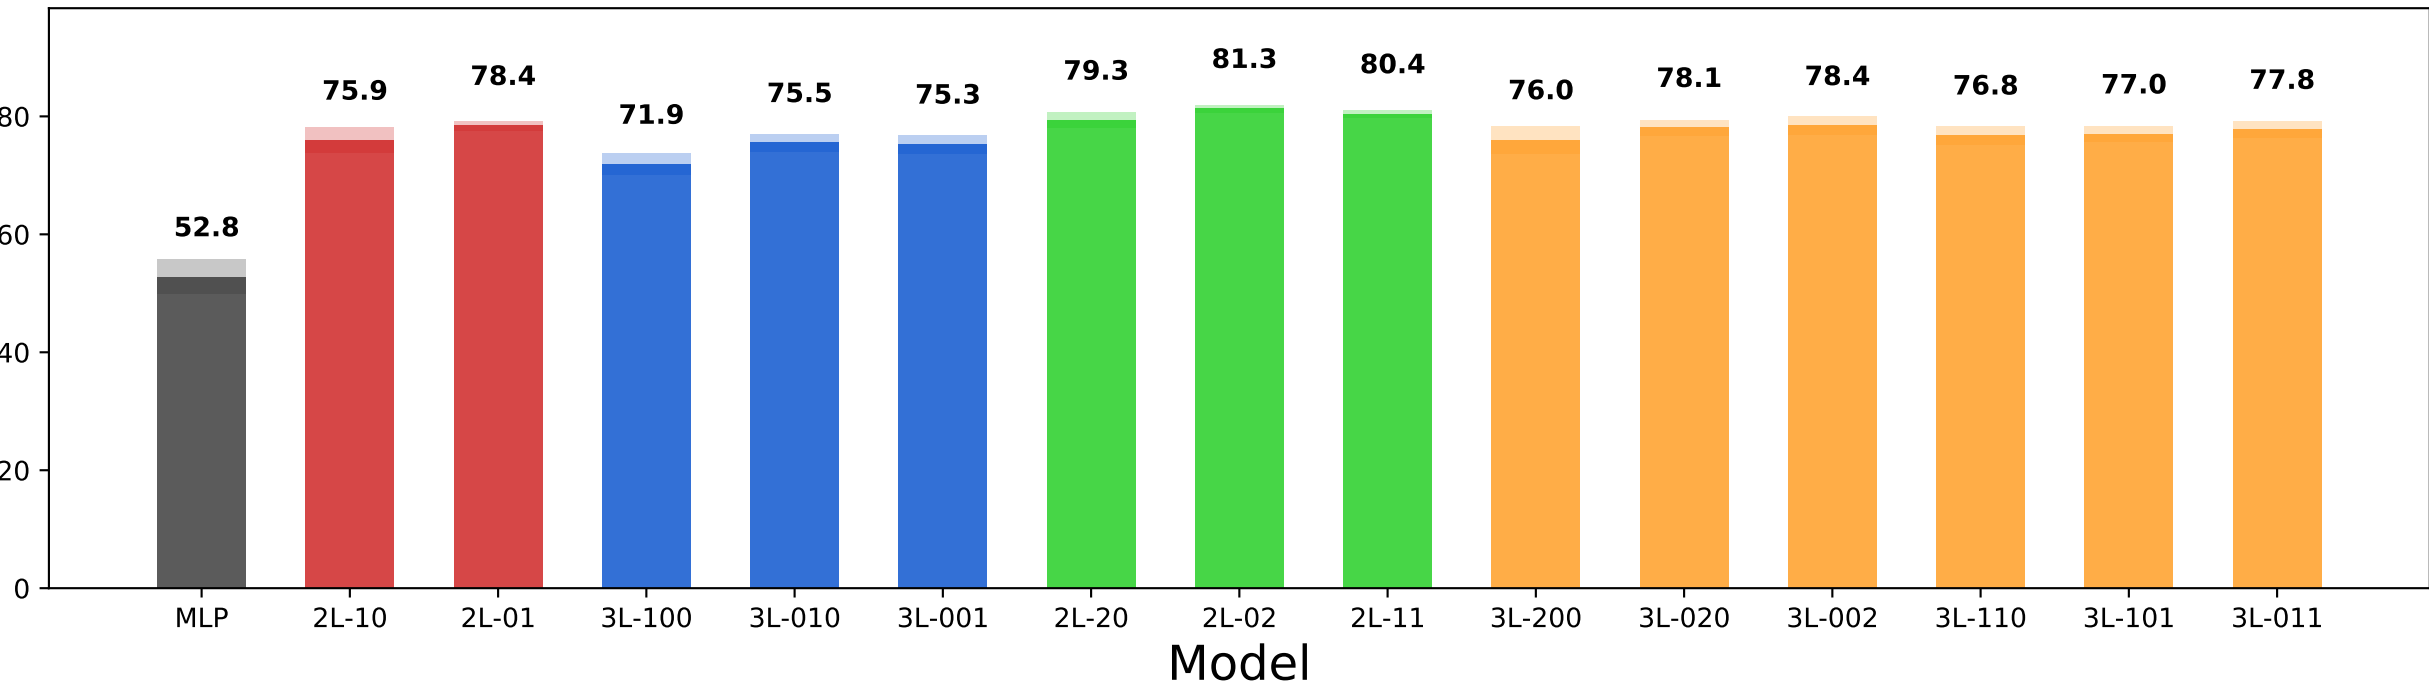

Supplement: supplementary_material [file attachment]

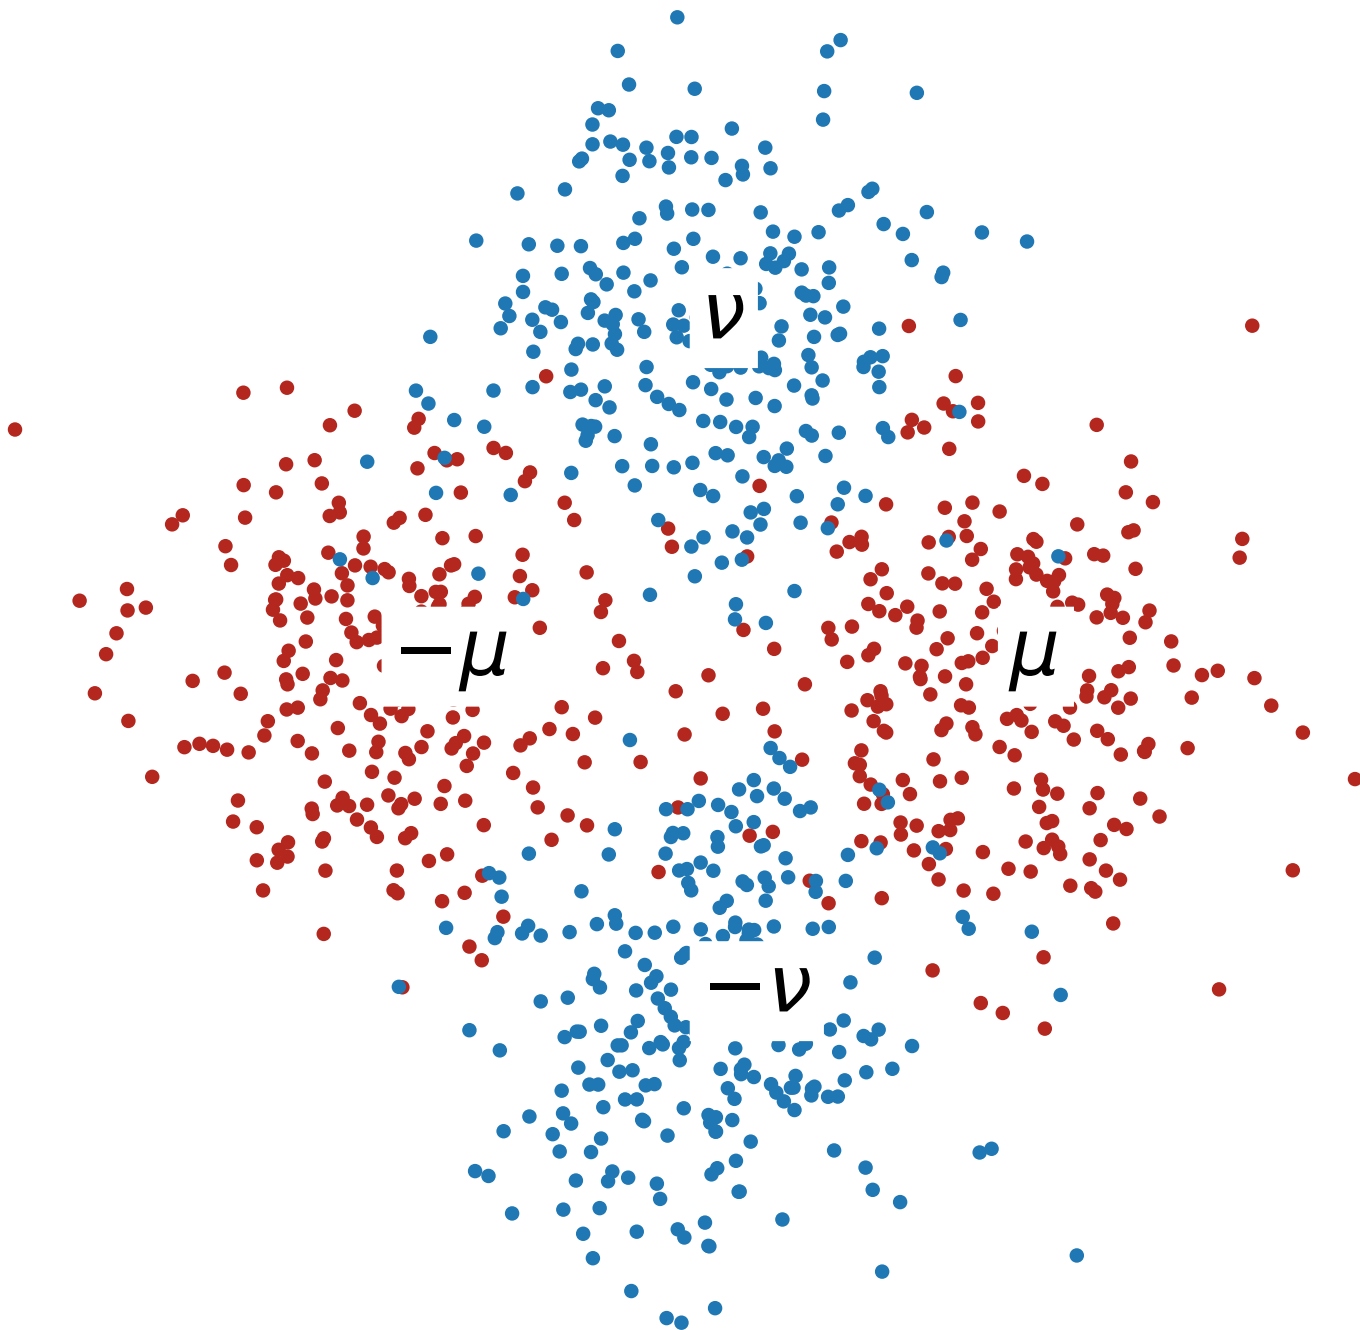

Supplement: supplementary_material [file attachment]

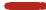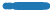

Supplement: supplementary_material [file attachment]

Test Accuracy

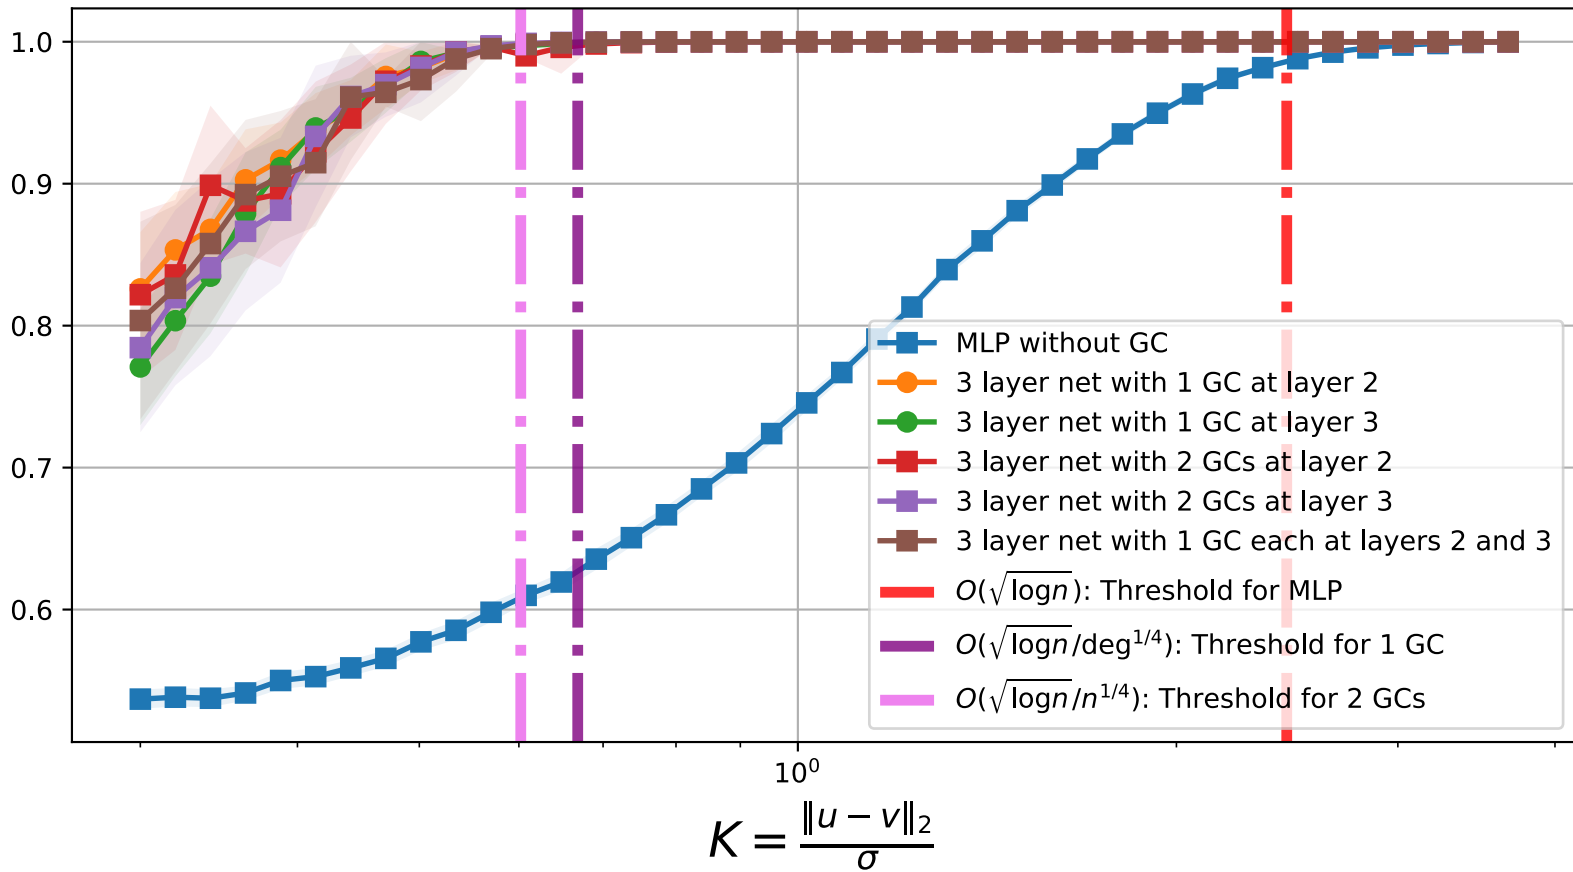

Supplement: supplementary_material [file attachment]

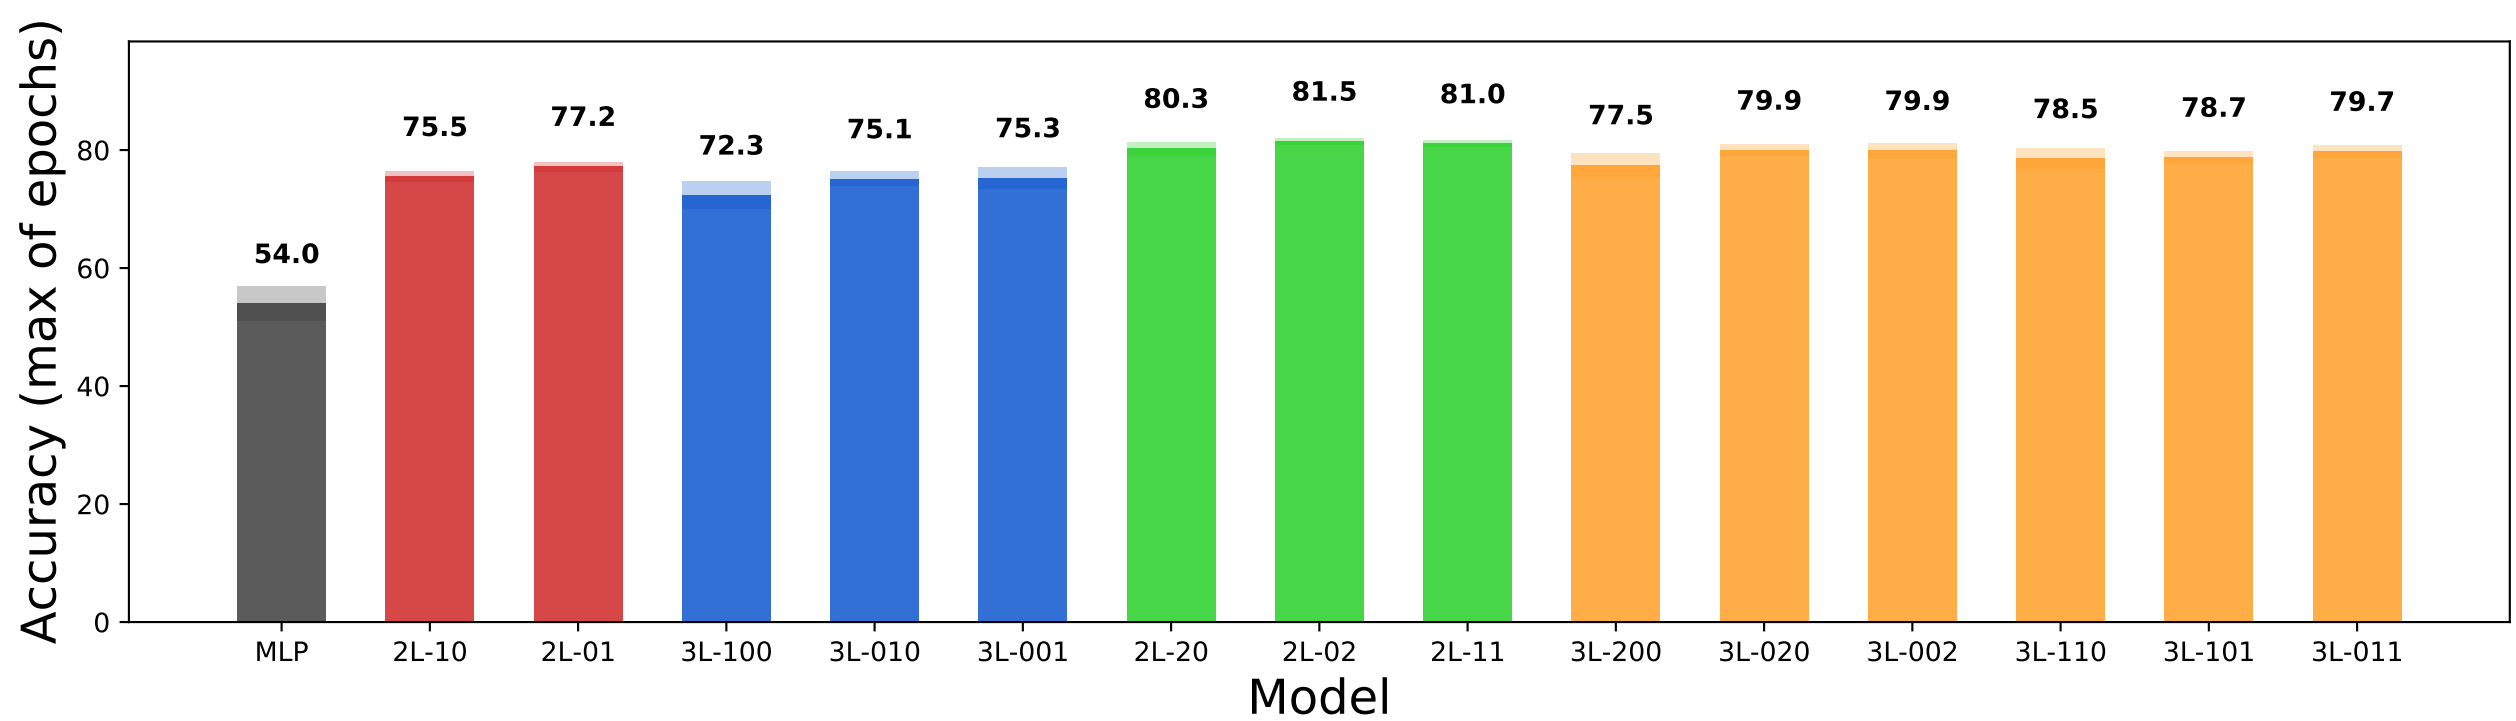

Supplement: supplementary_material [file attachment]

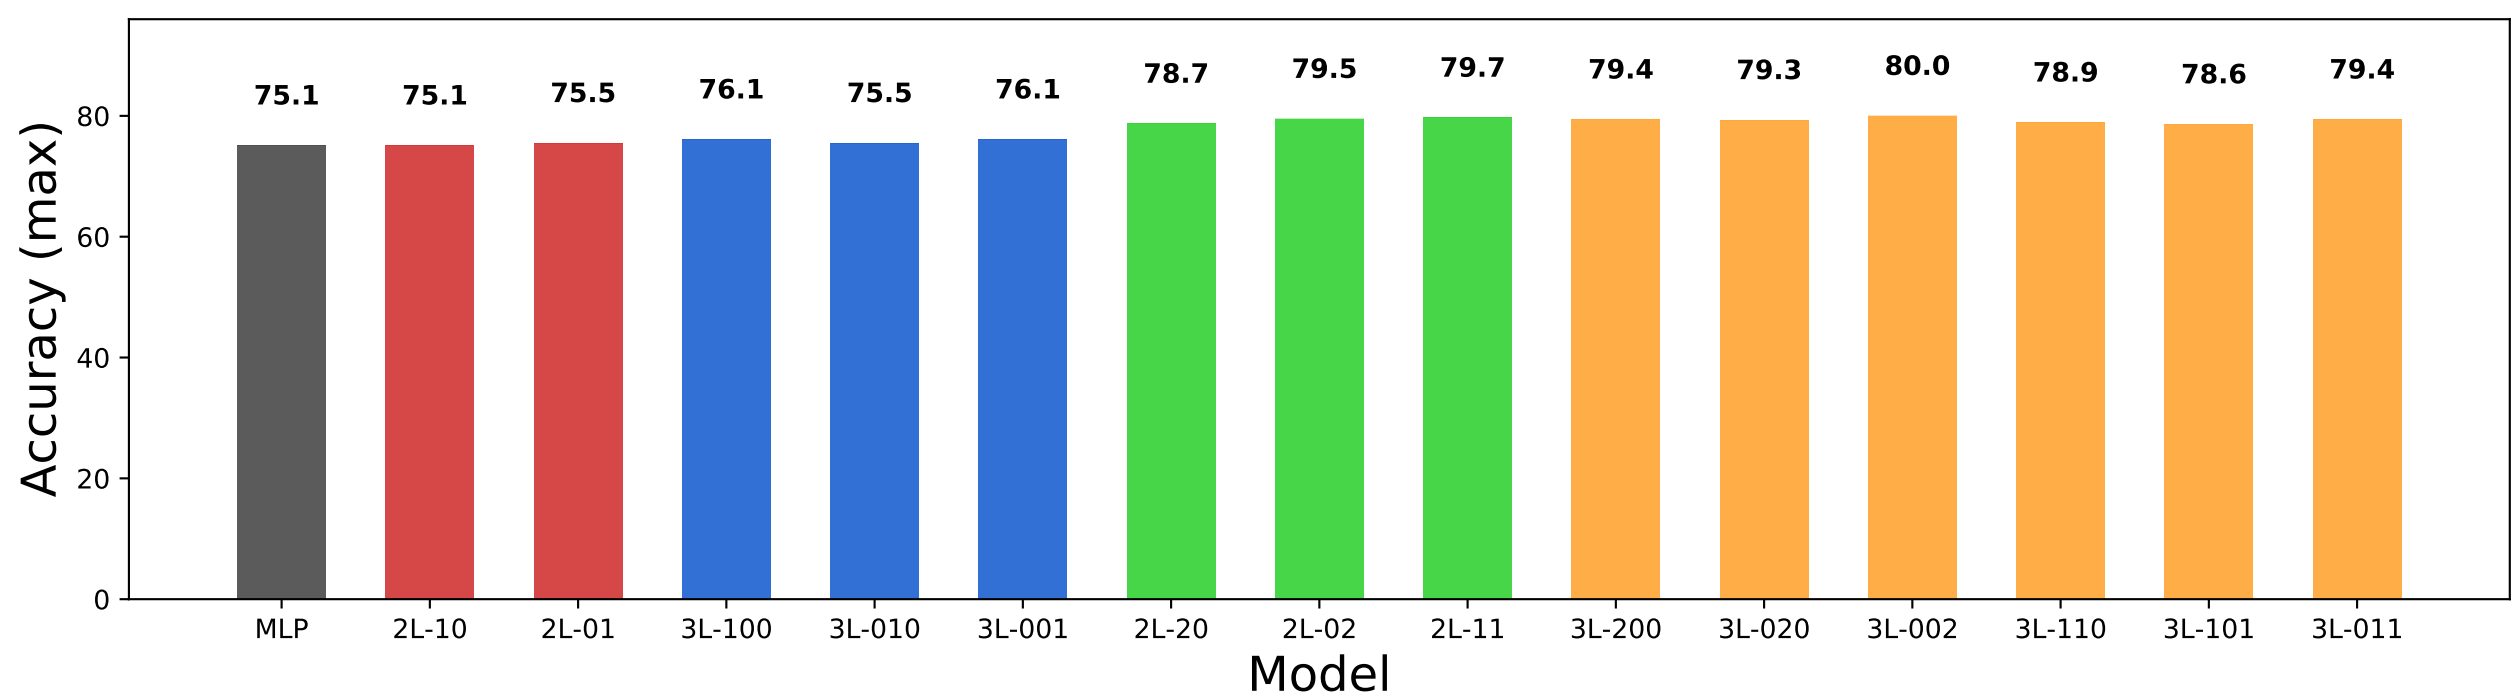

Supplement: supplementary_material [file attachment]

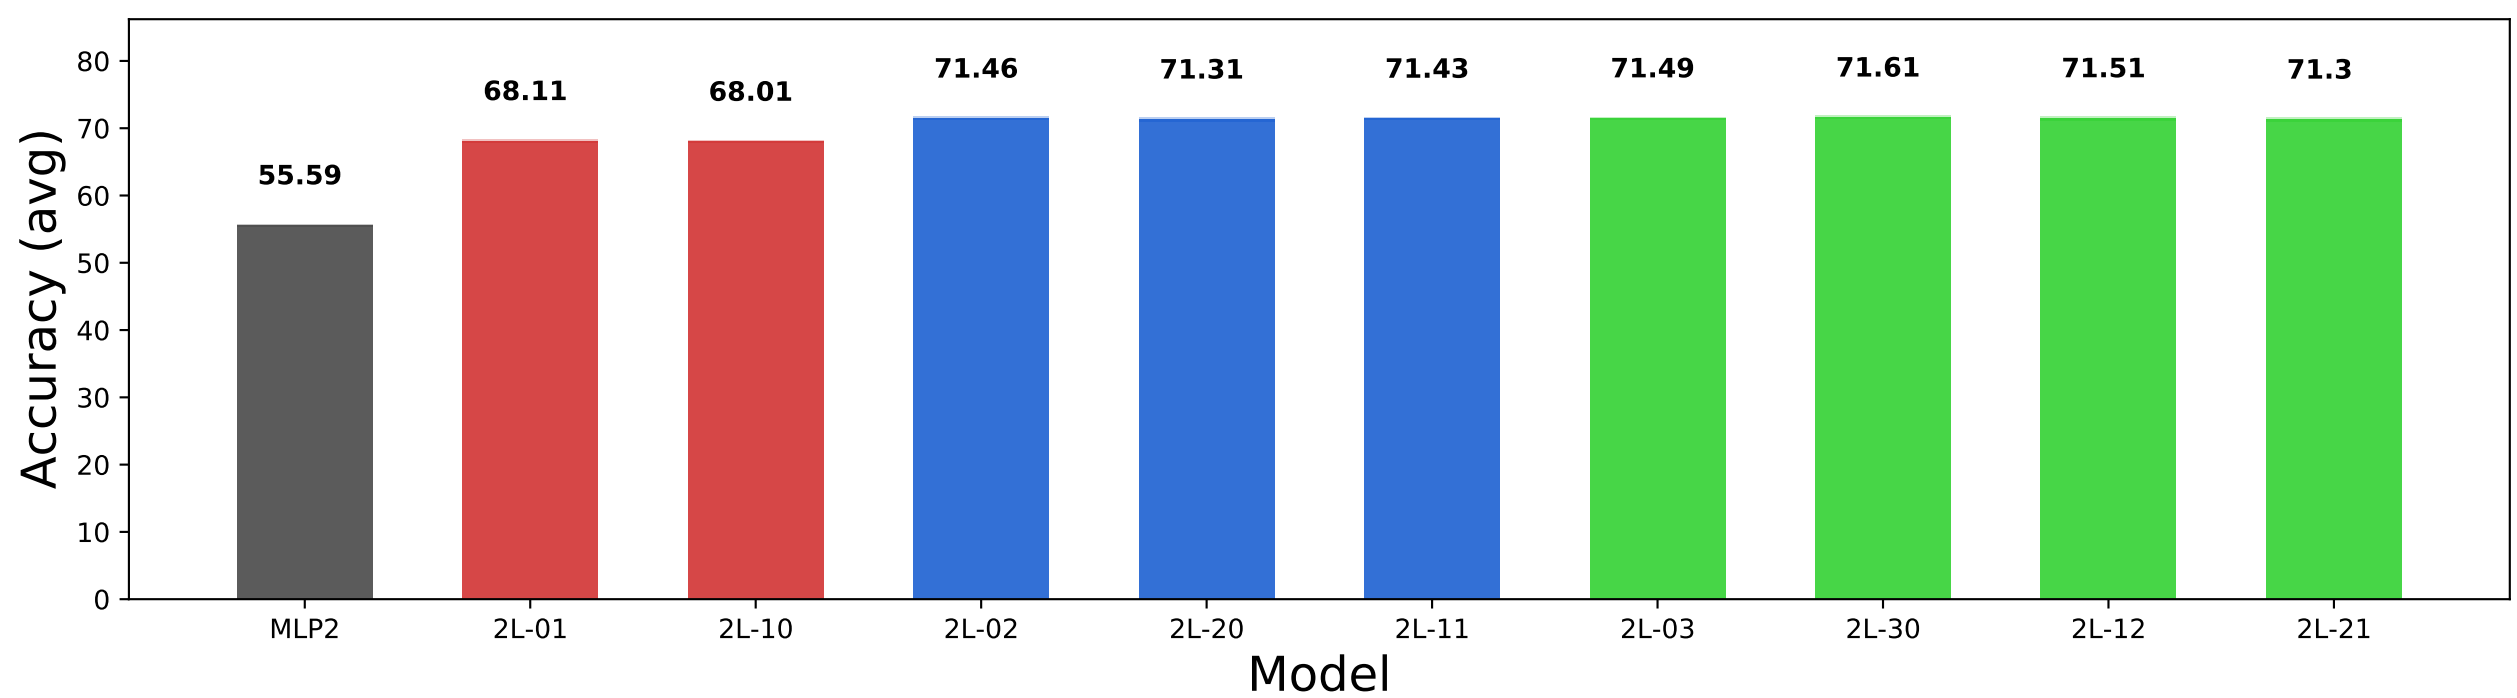

Supplement: supplementary_material [file attachment]

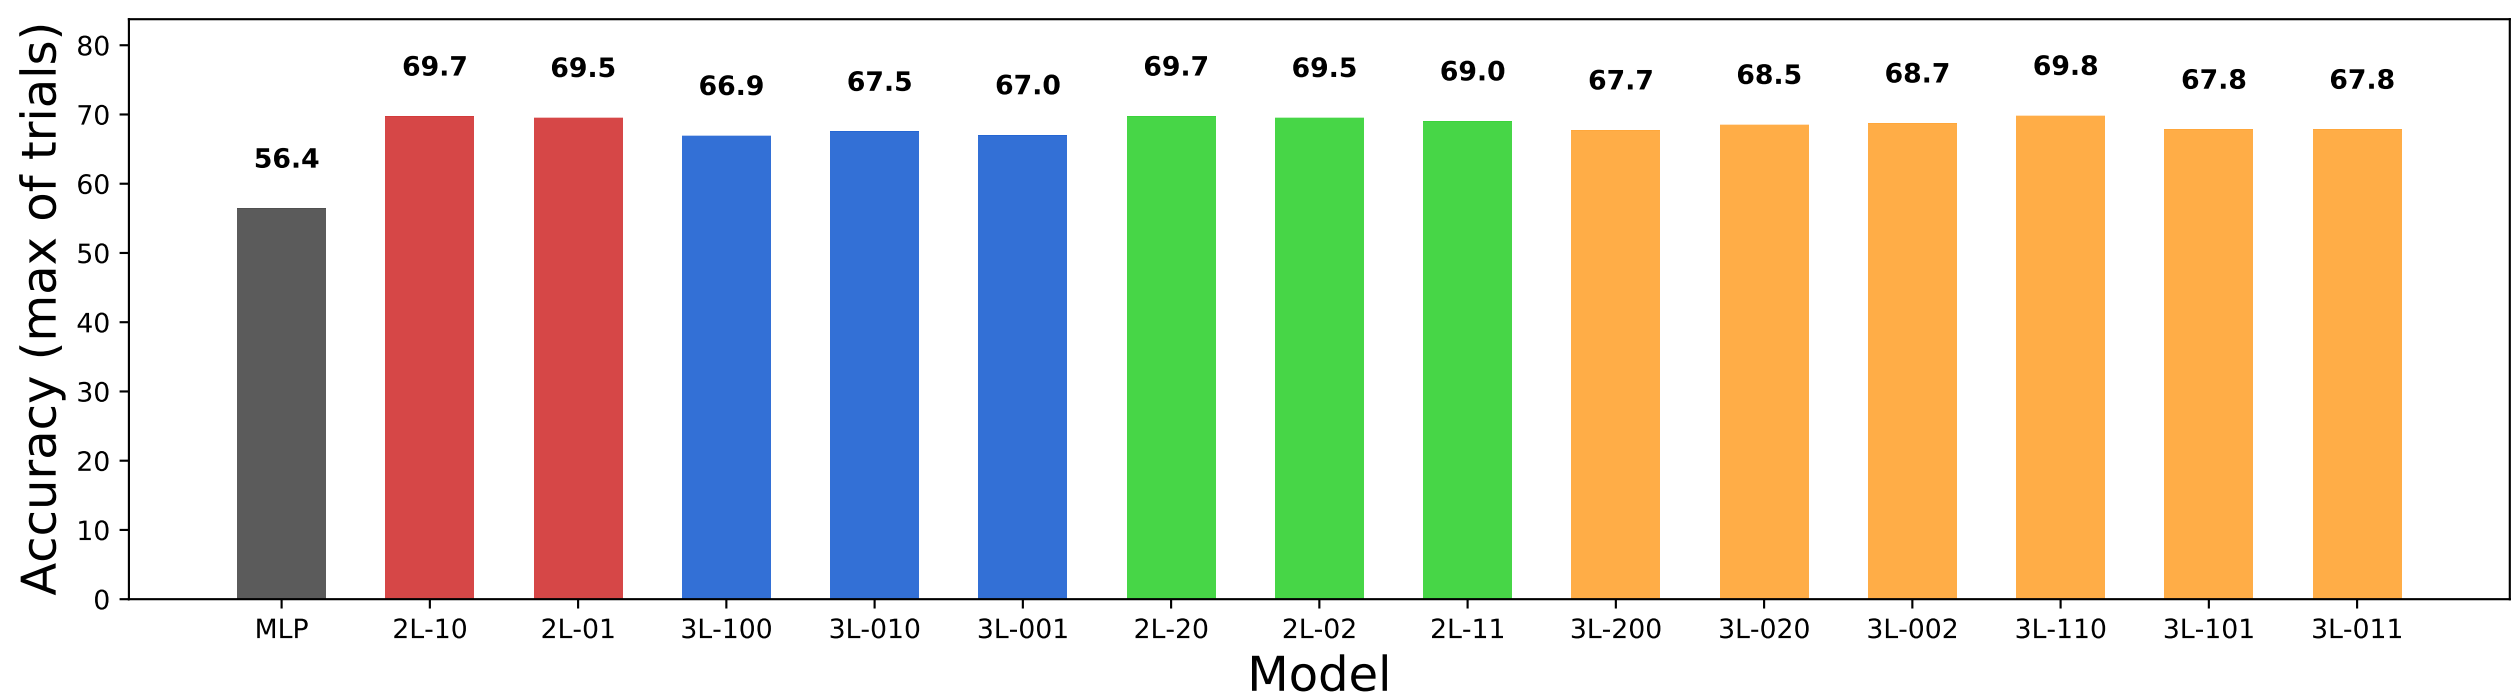

Supplement: supplementary_material [file attachment]

Train Accuracy

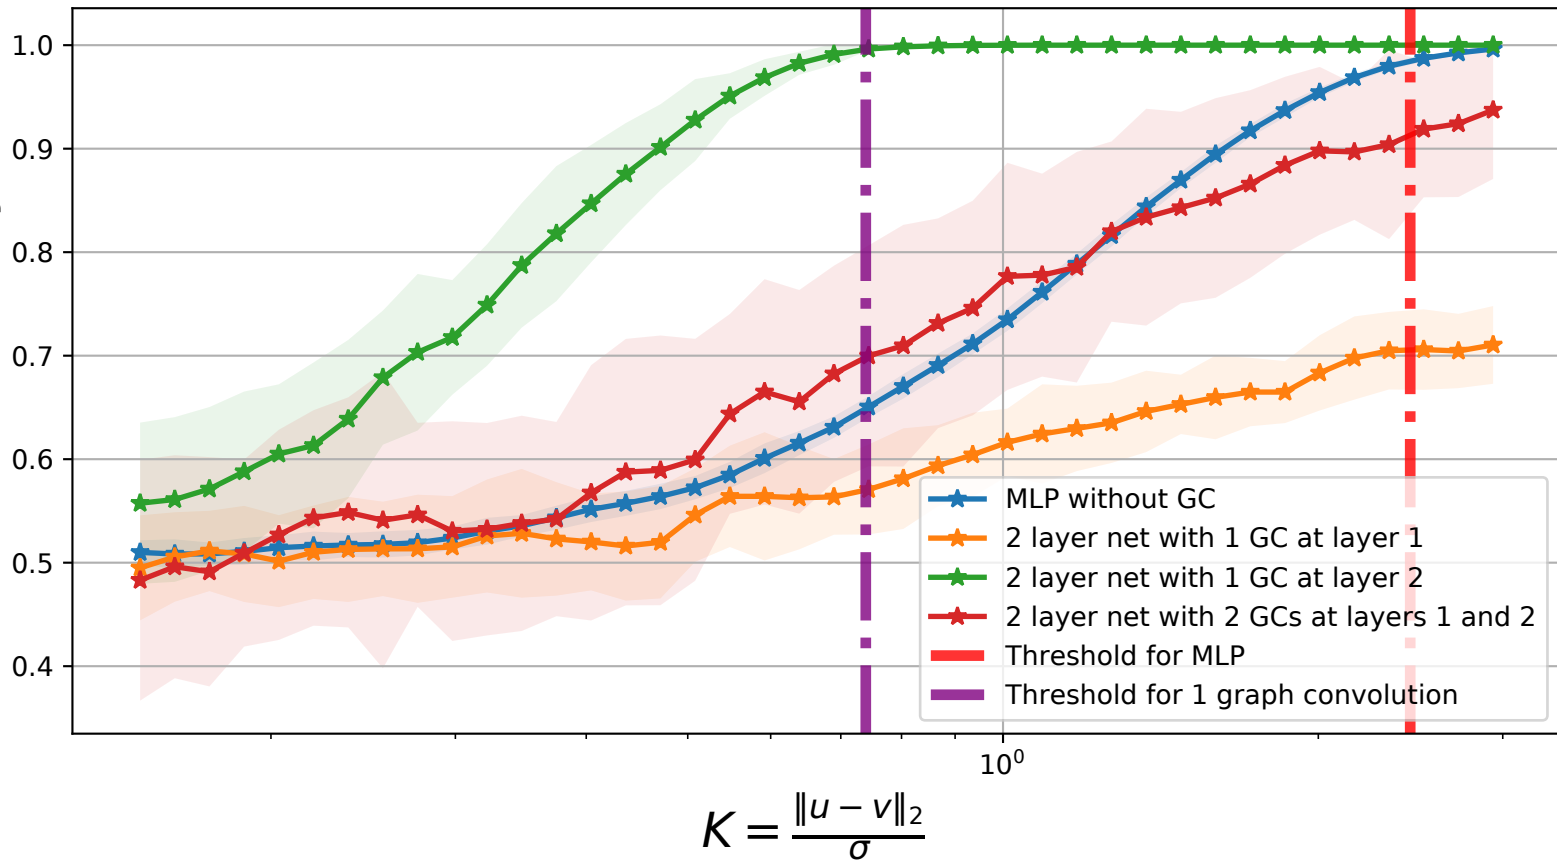

Supplement: supplementary_material [file attachment]

Test Accuracy

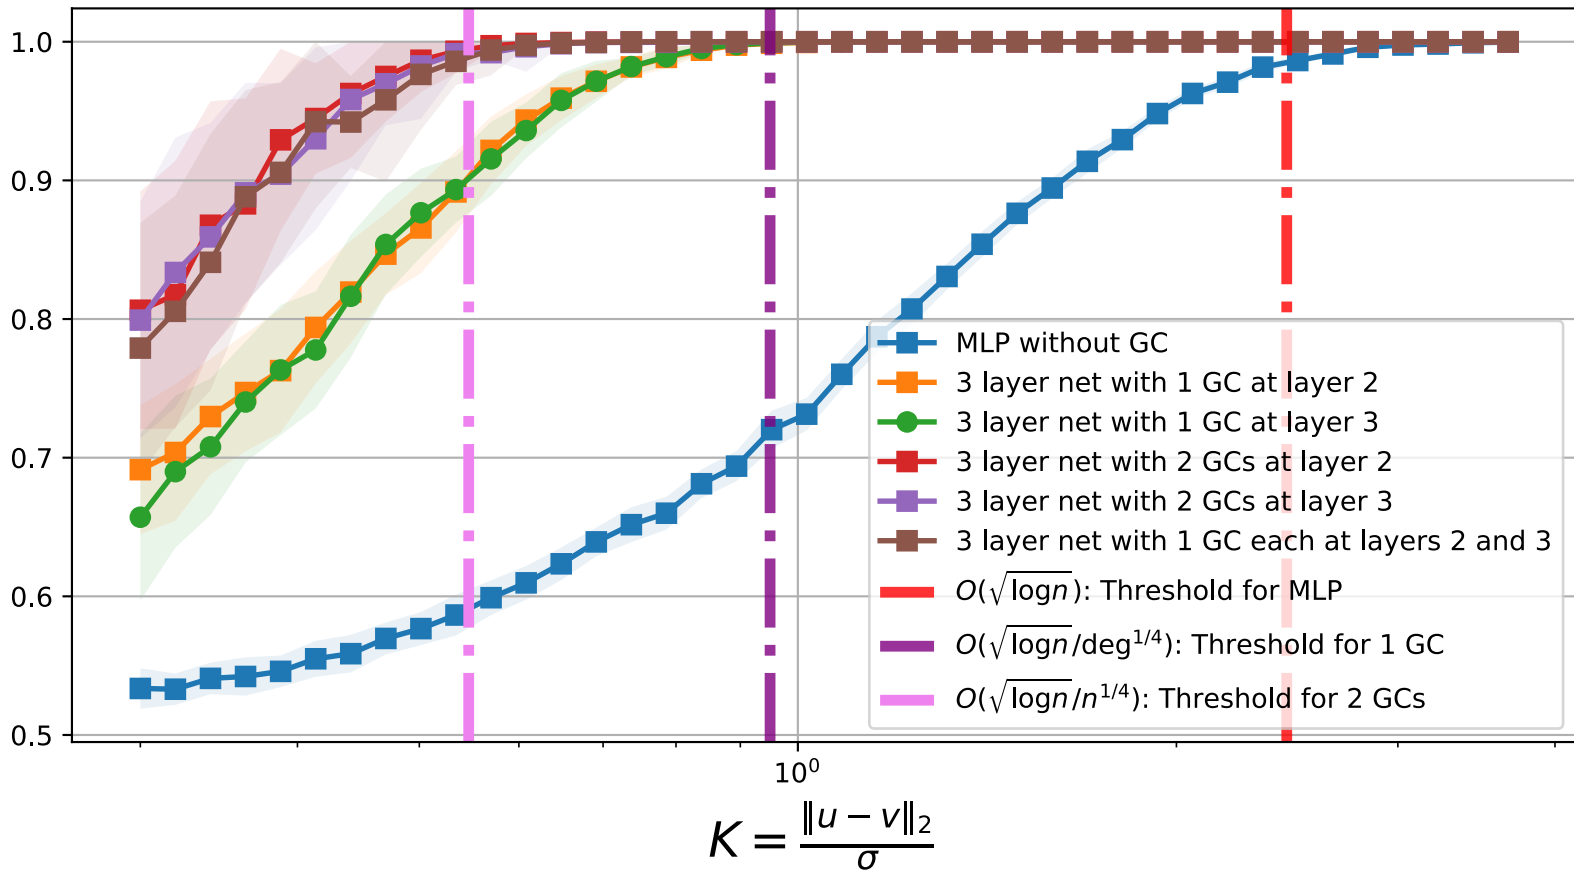

Supplement: supplementary_material [file attachment]

Train Loss

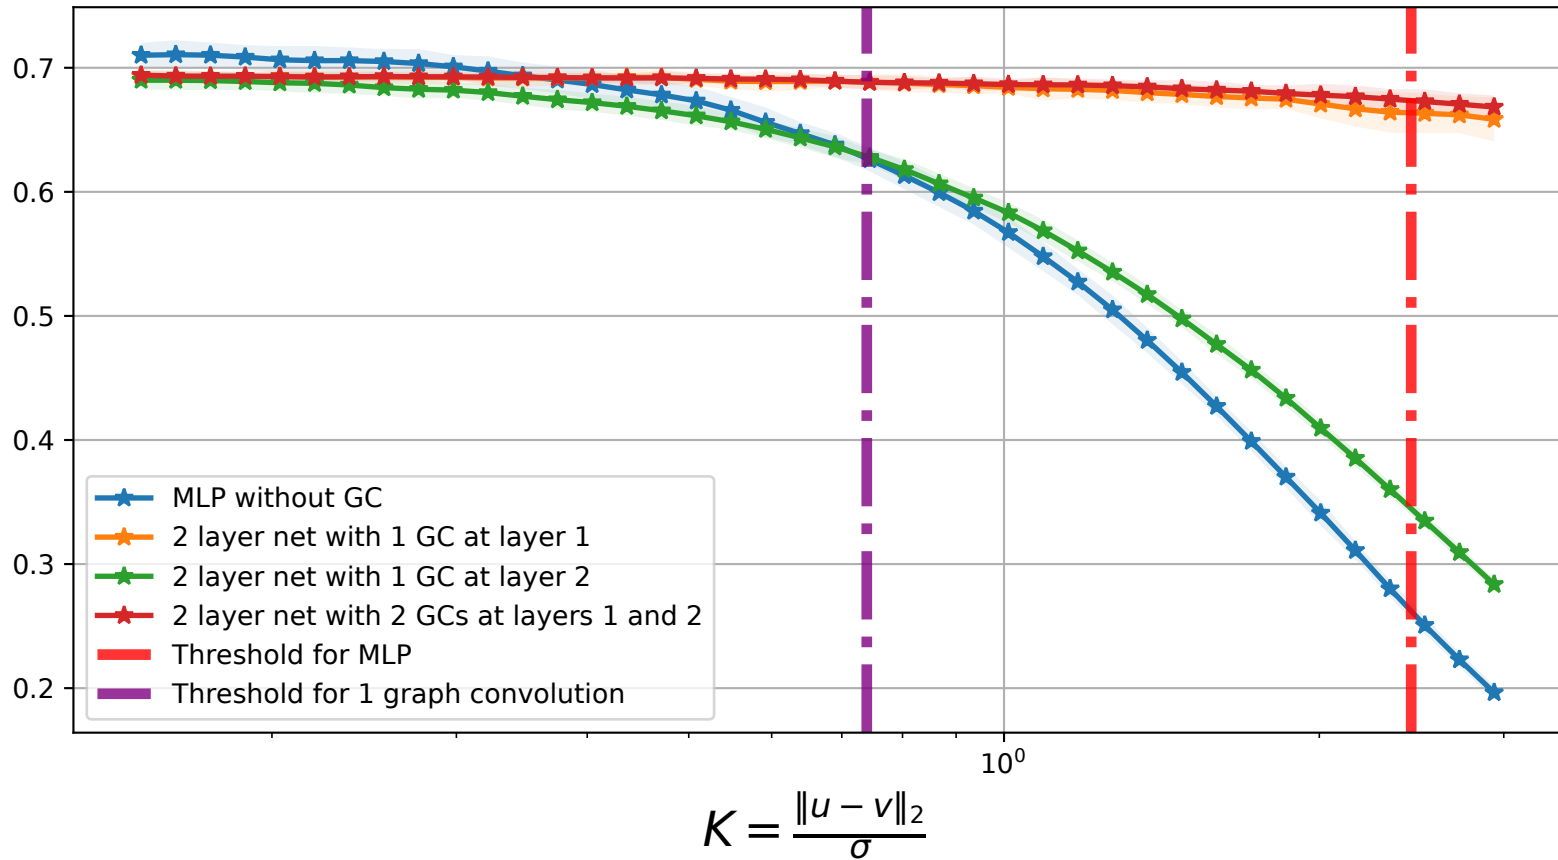

Supplement: supplementary_material [file attachment]

Accuracy (max)

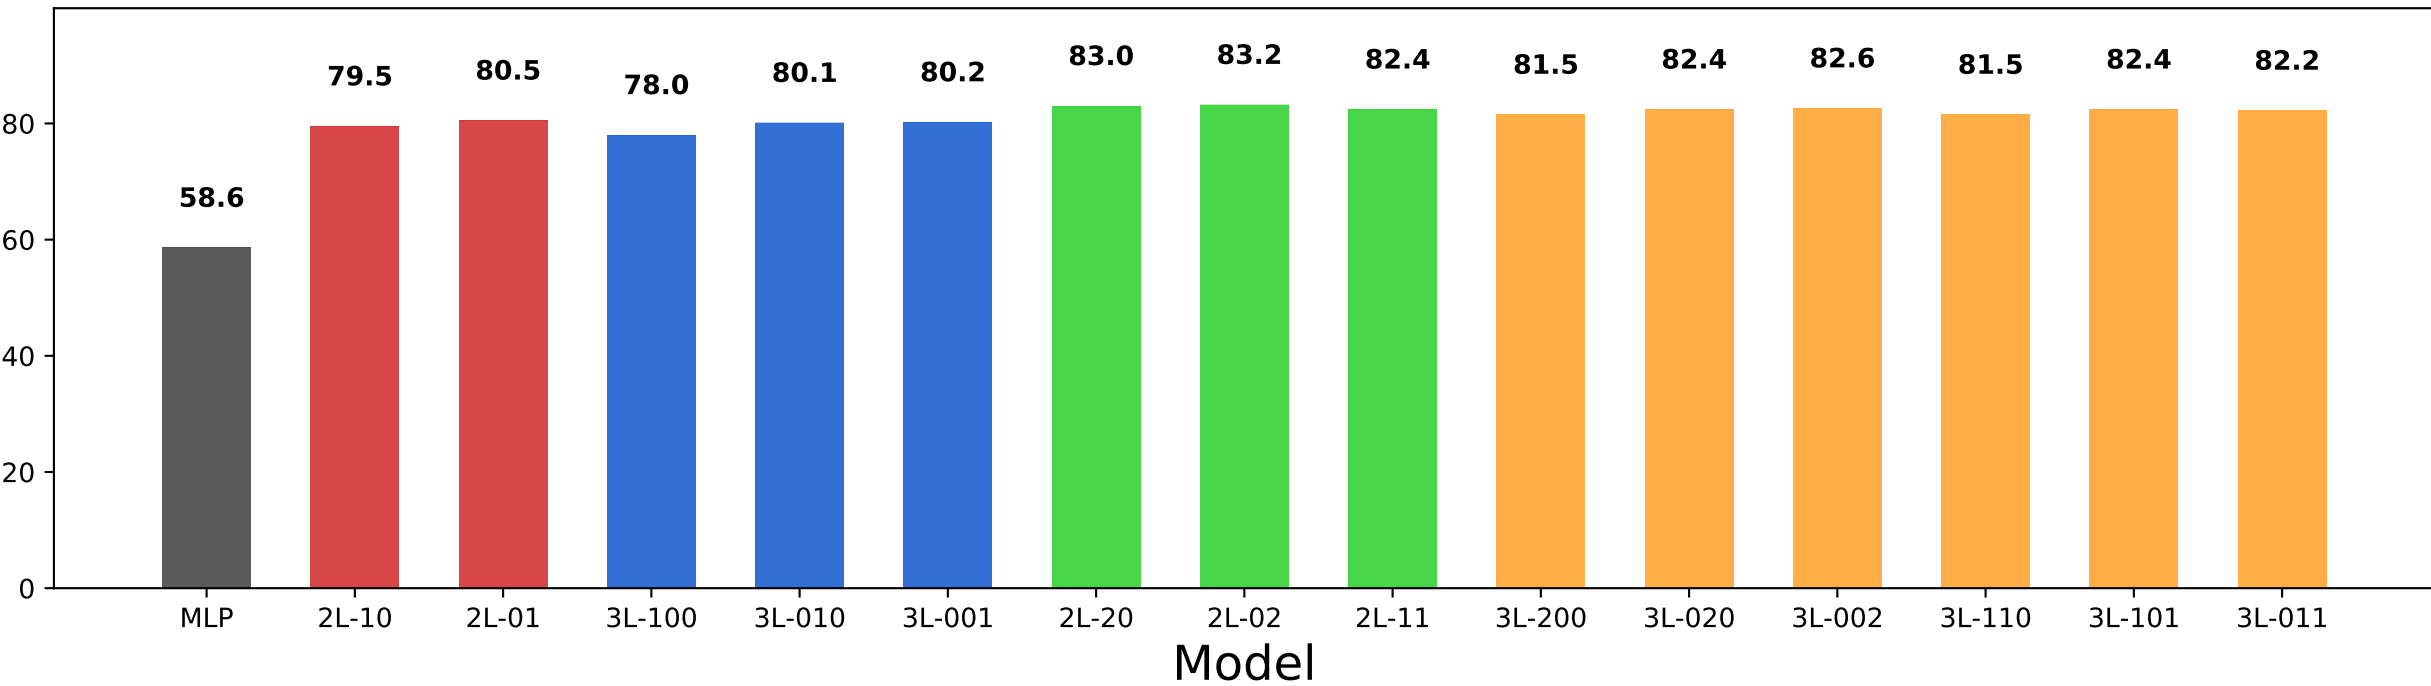

Supplement: supplementary_material [file attachment]

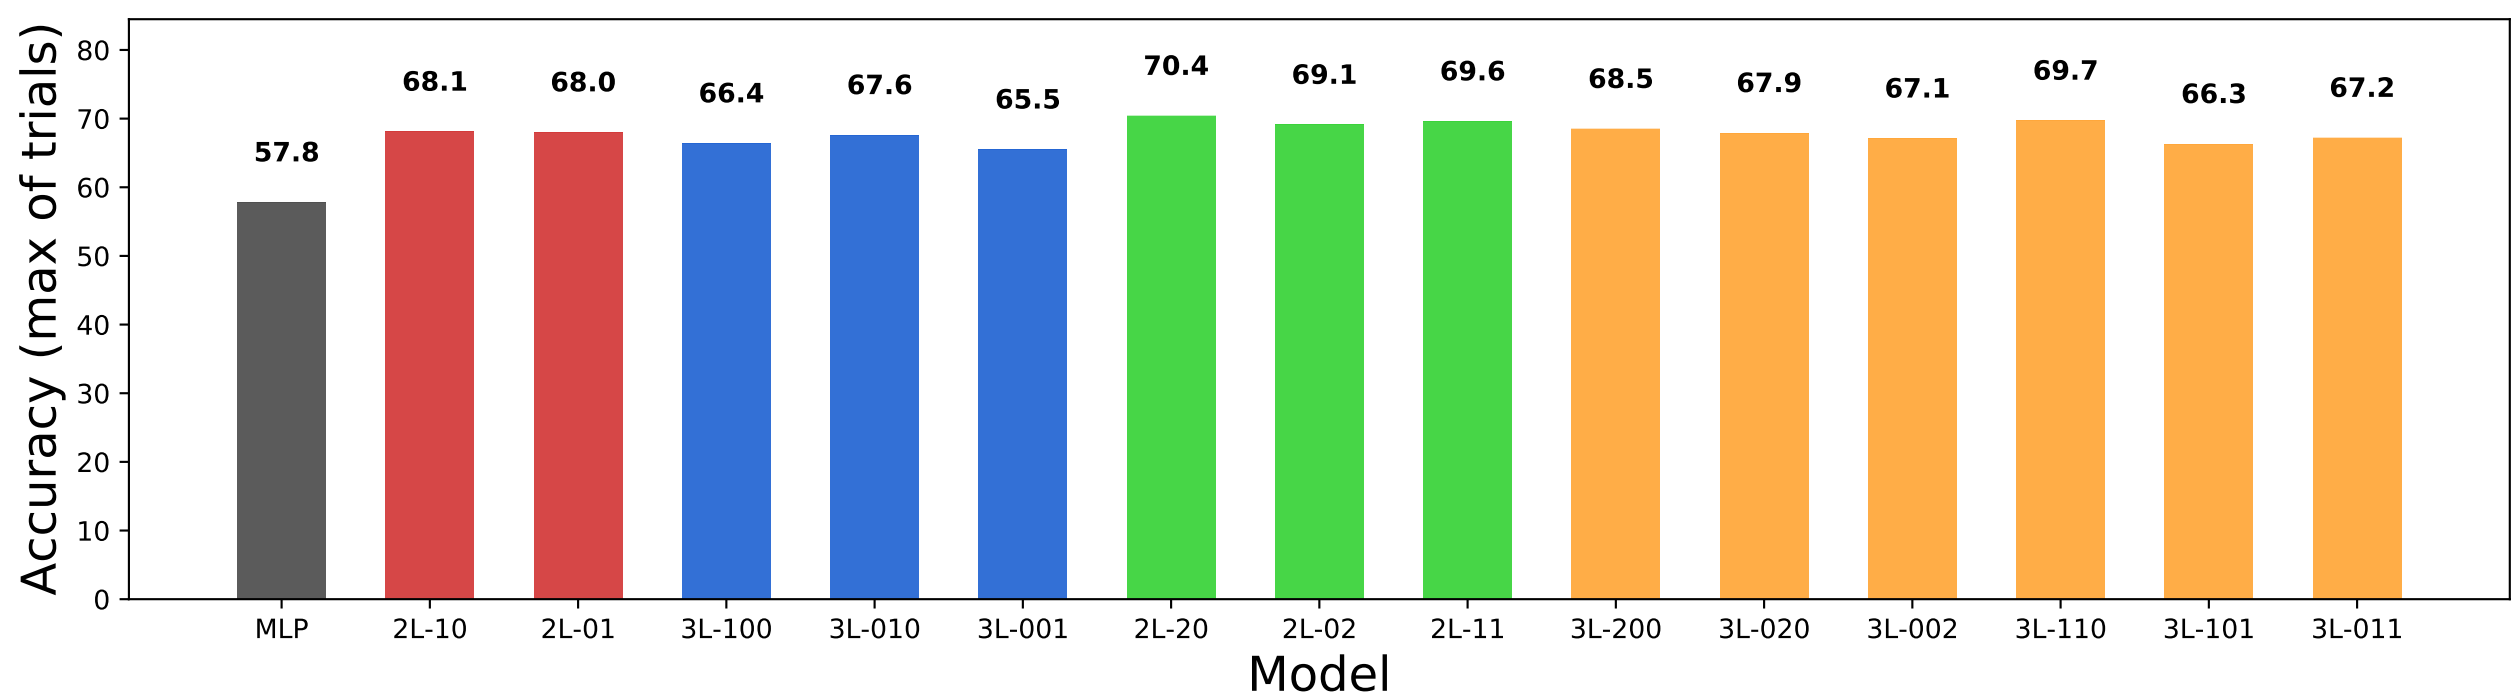

Supplement: supplementary_material [file attachment]

Accuracy (max)

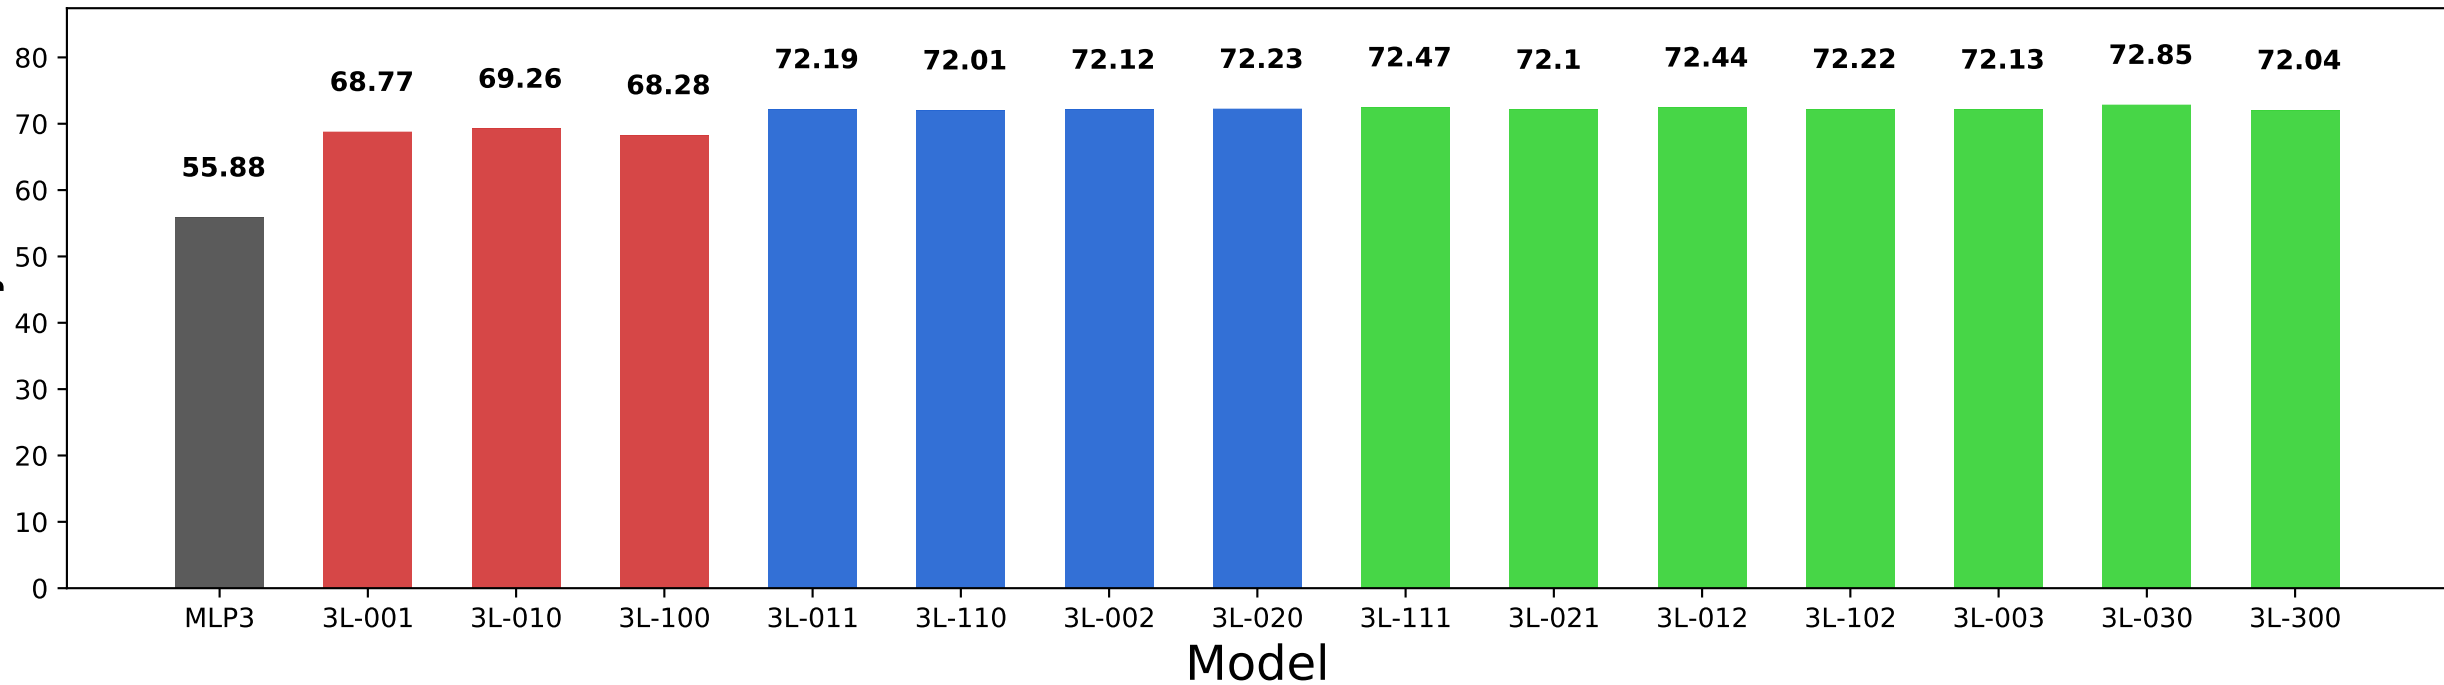

Supplement: supplementary_material [file attachment]

Test Accuracy

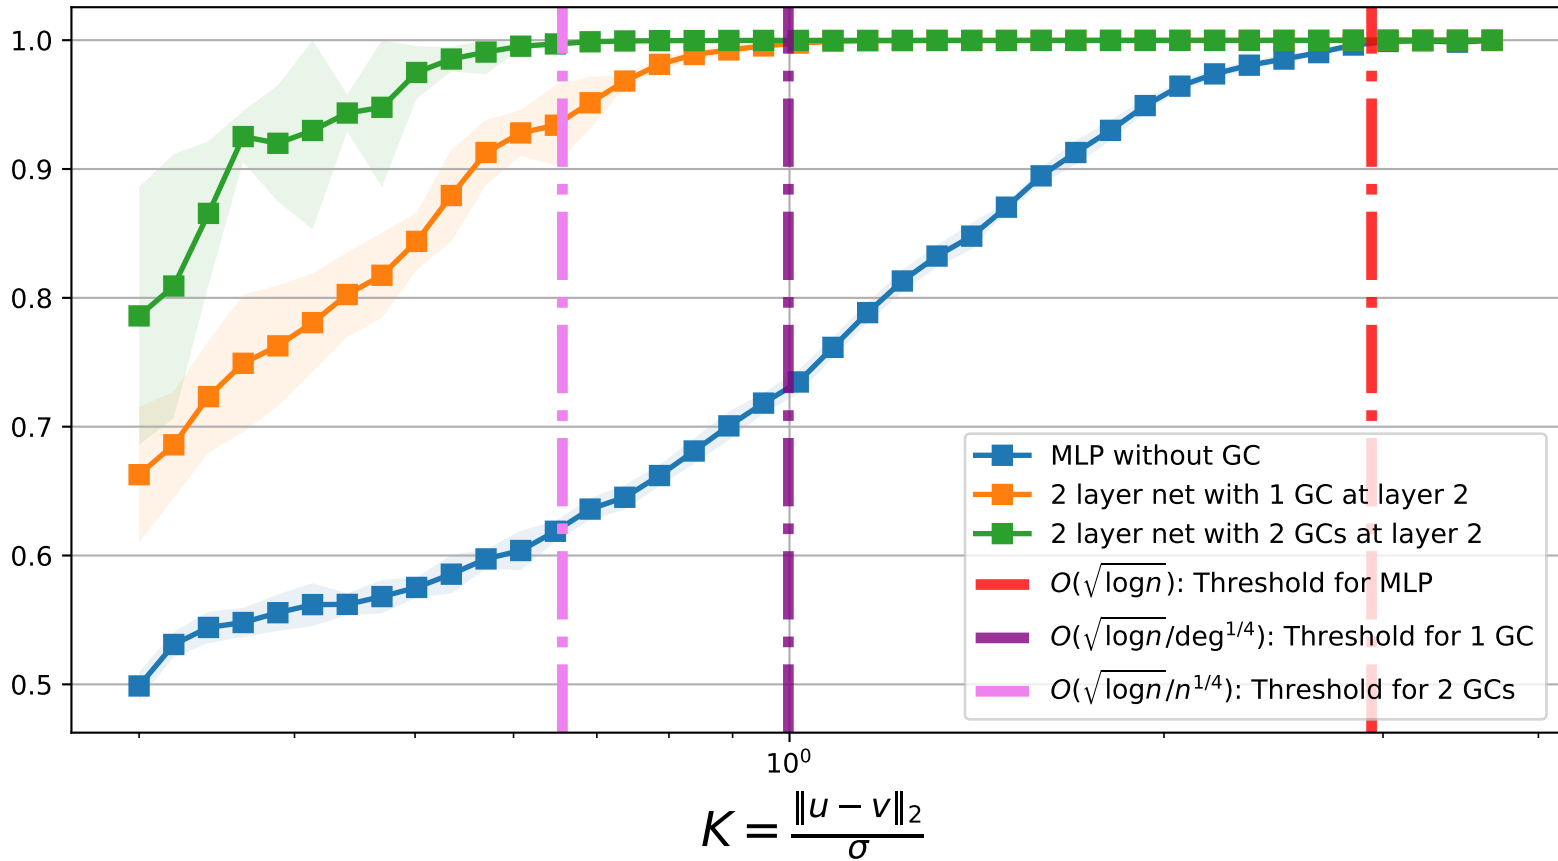

Supplement: supplementary_material [file attachment]

Test Accuracy

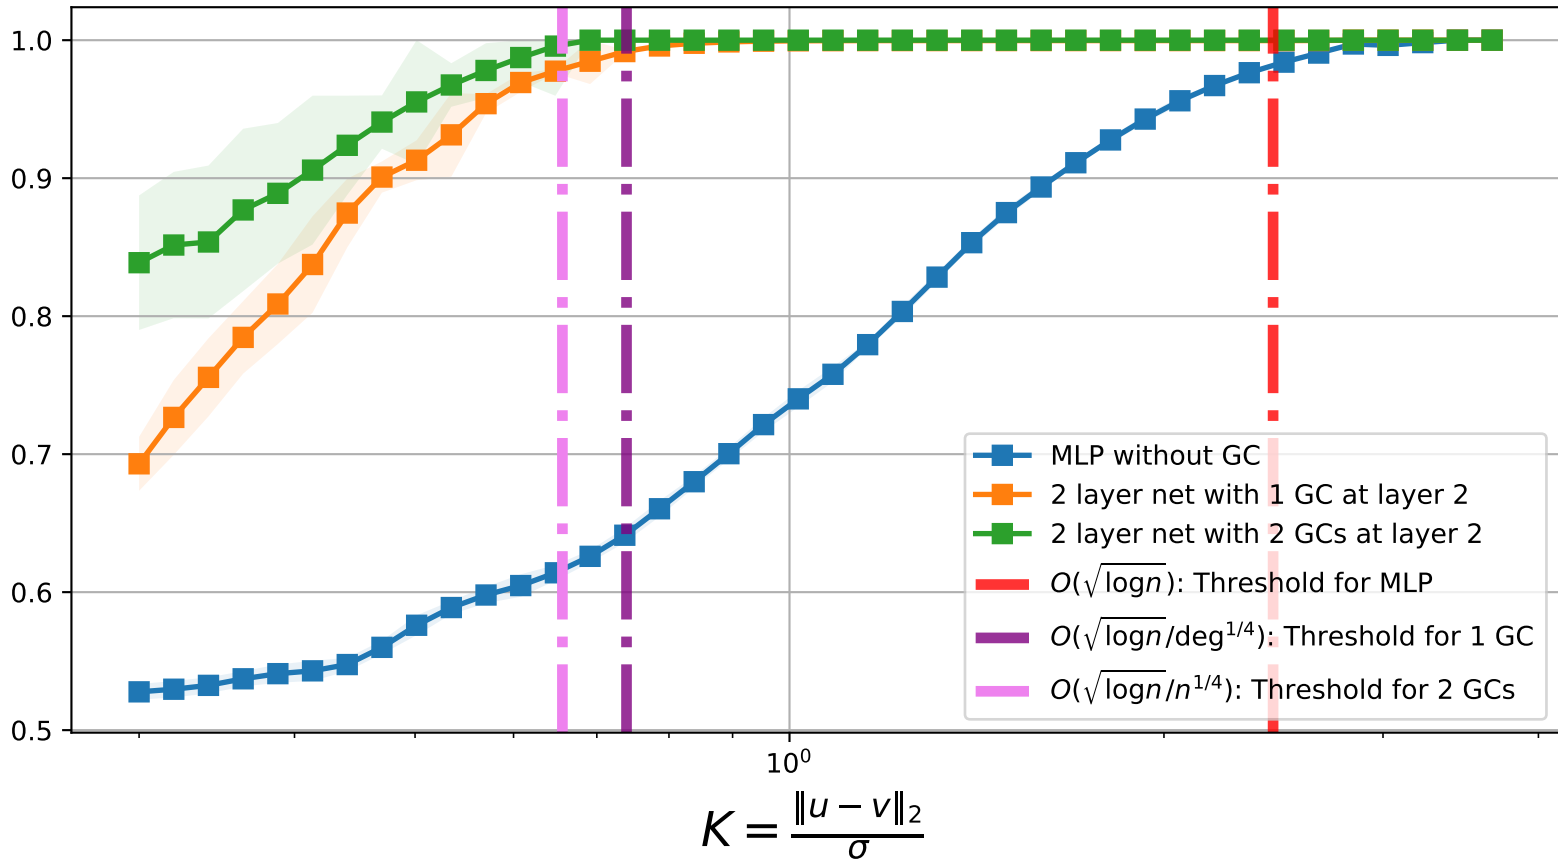

Supplement: supplementary_material [file attachment]

Test Accuracy

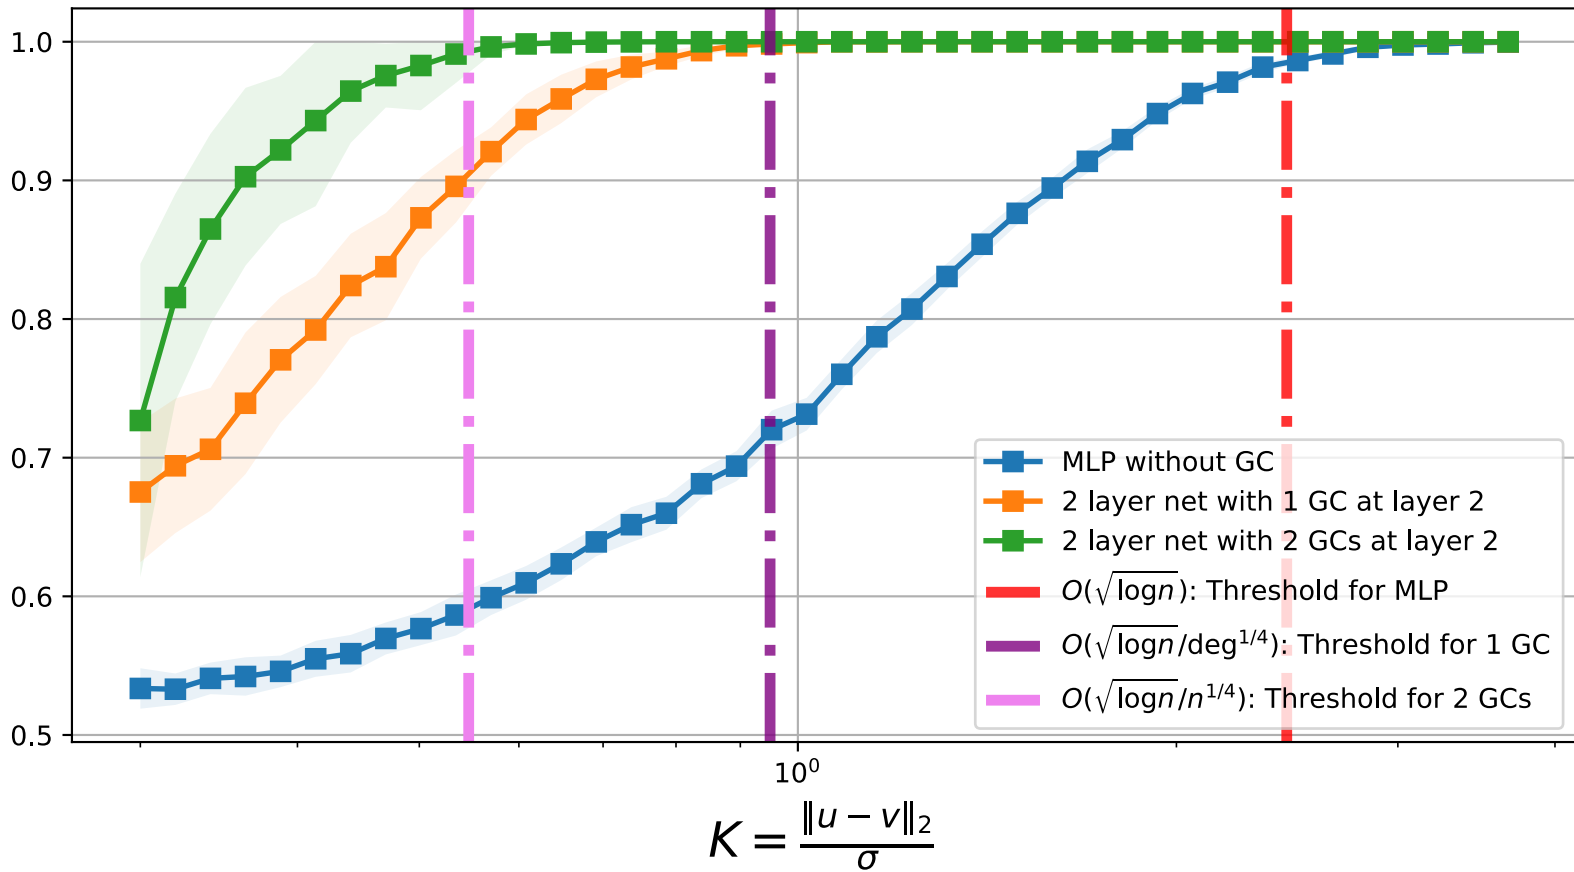

Supplement: supplementary_material [file attachment]

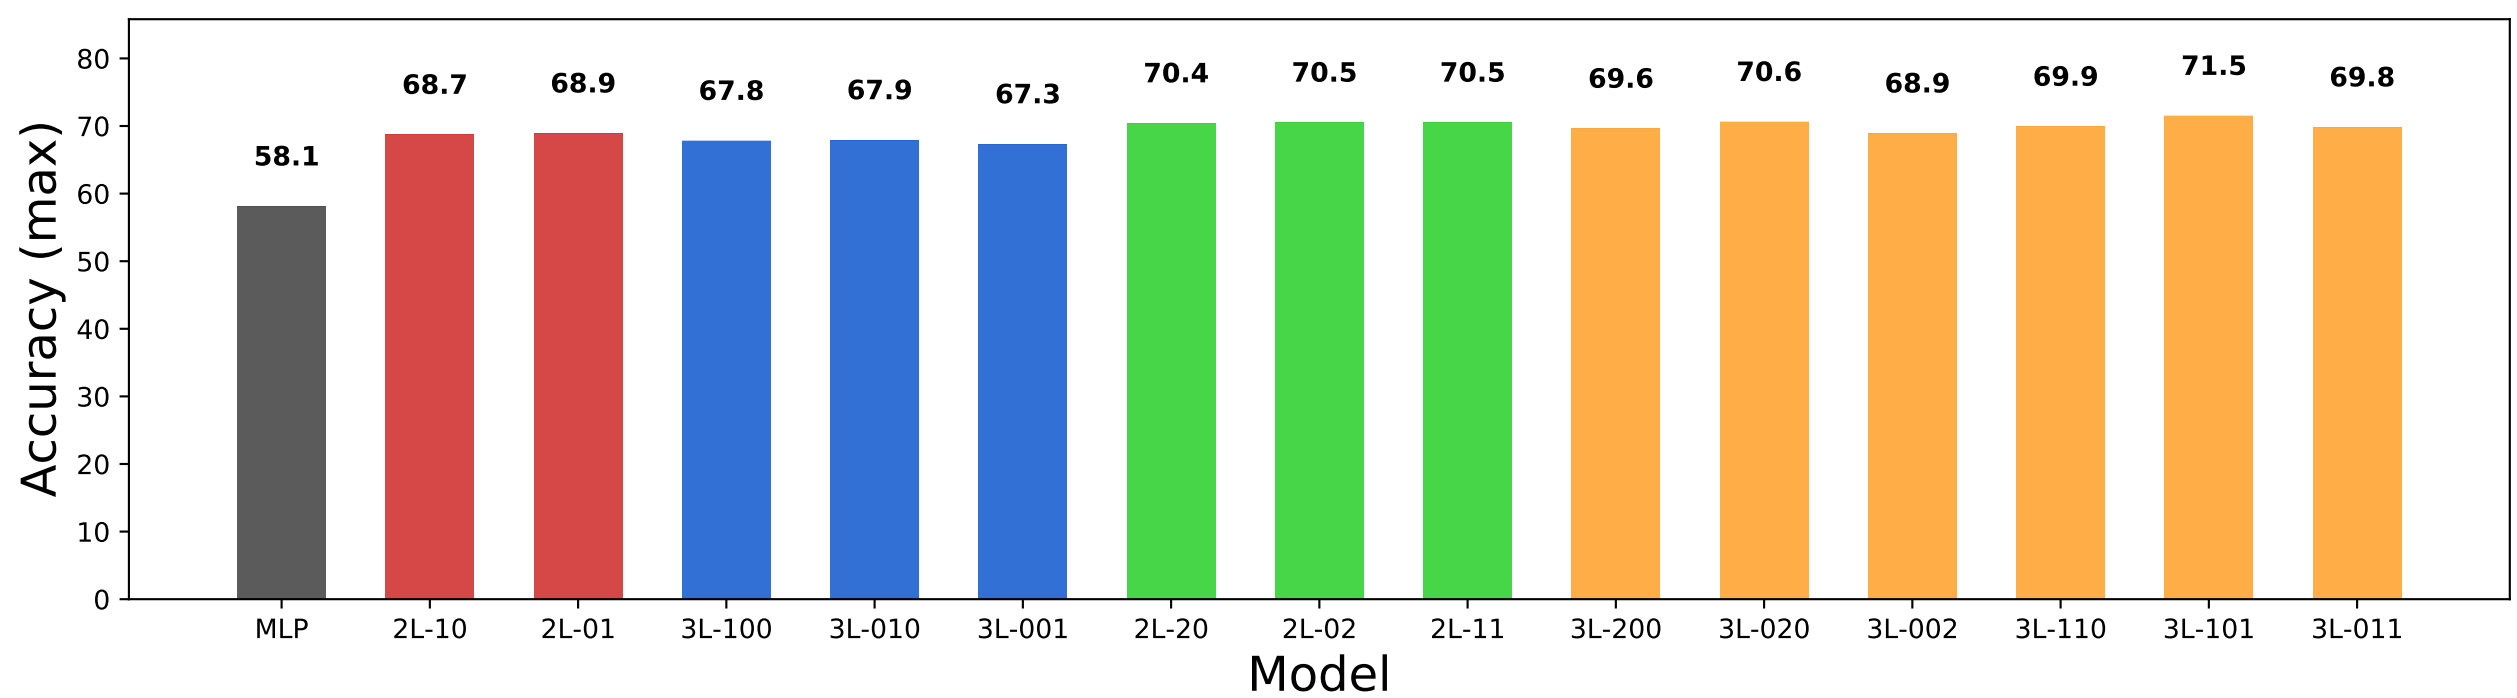

Supplement: supplementary_material [file attachment]

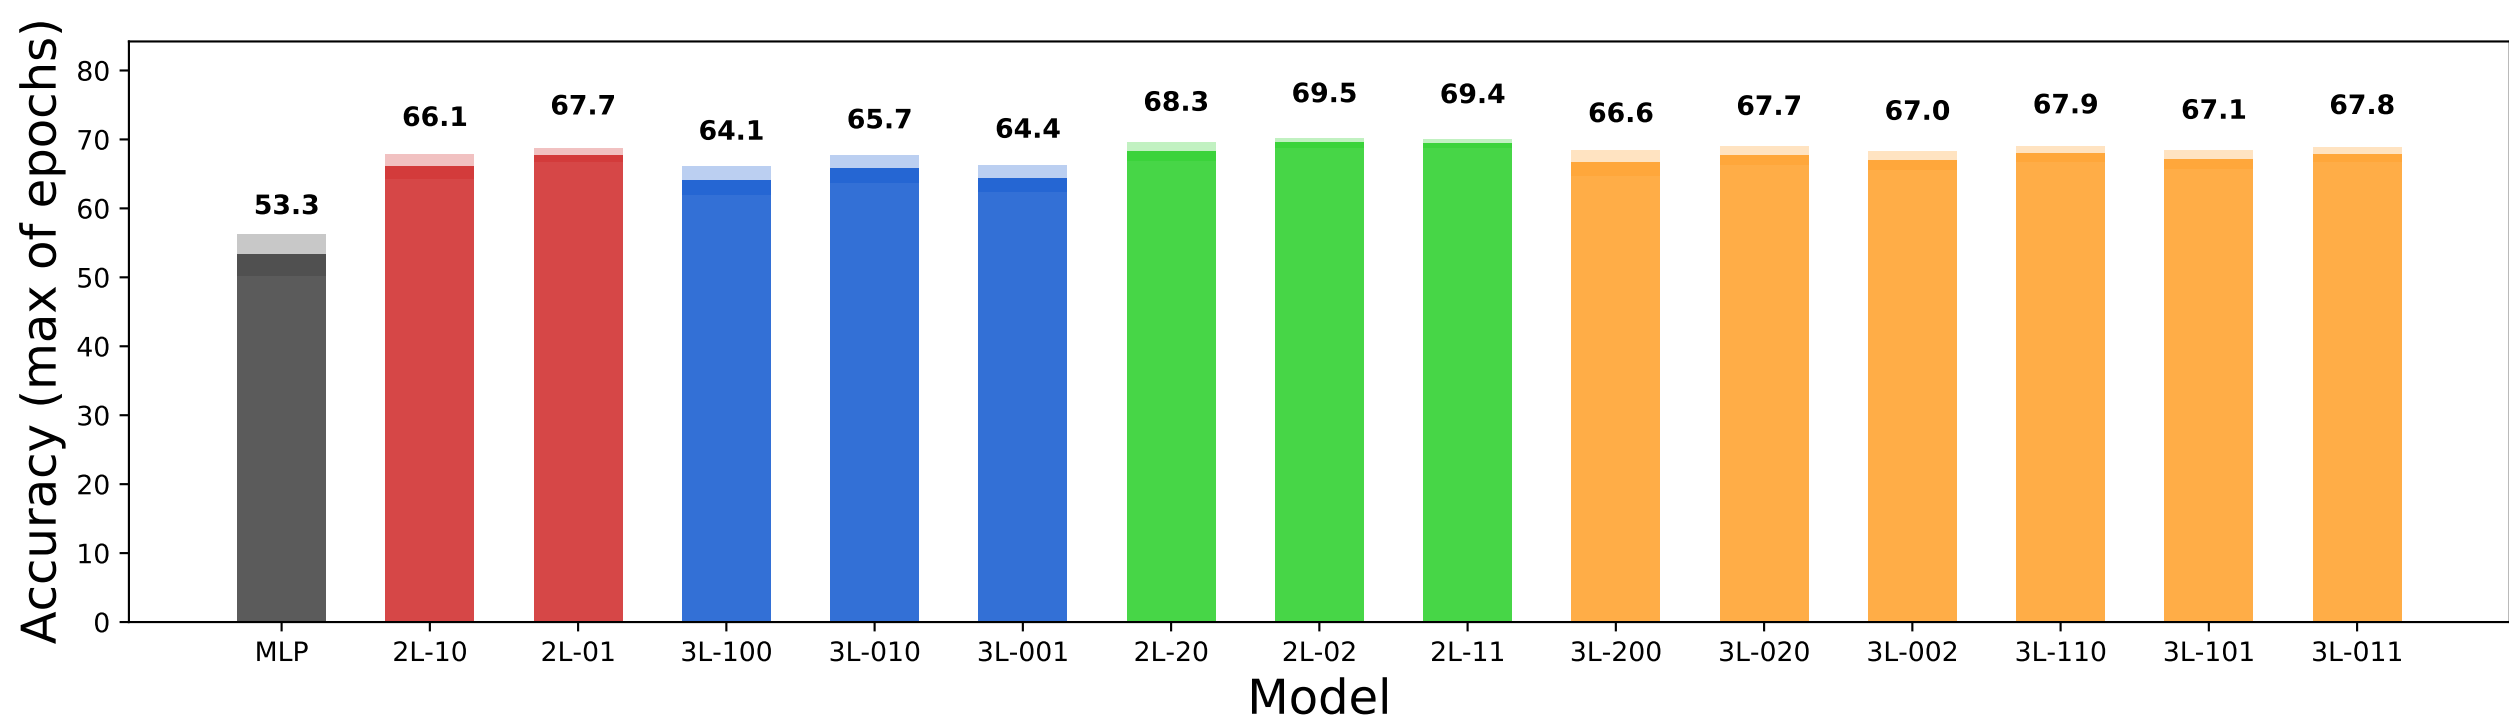

Supplement: supplementary_material [file attachment]

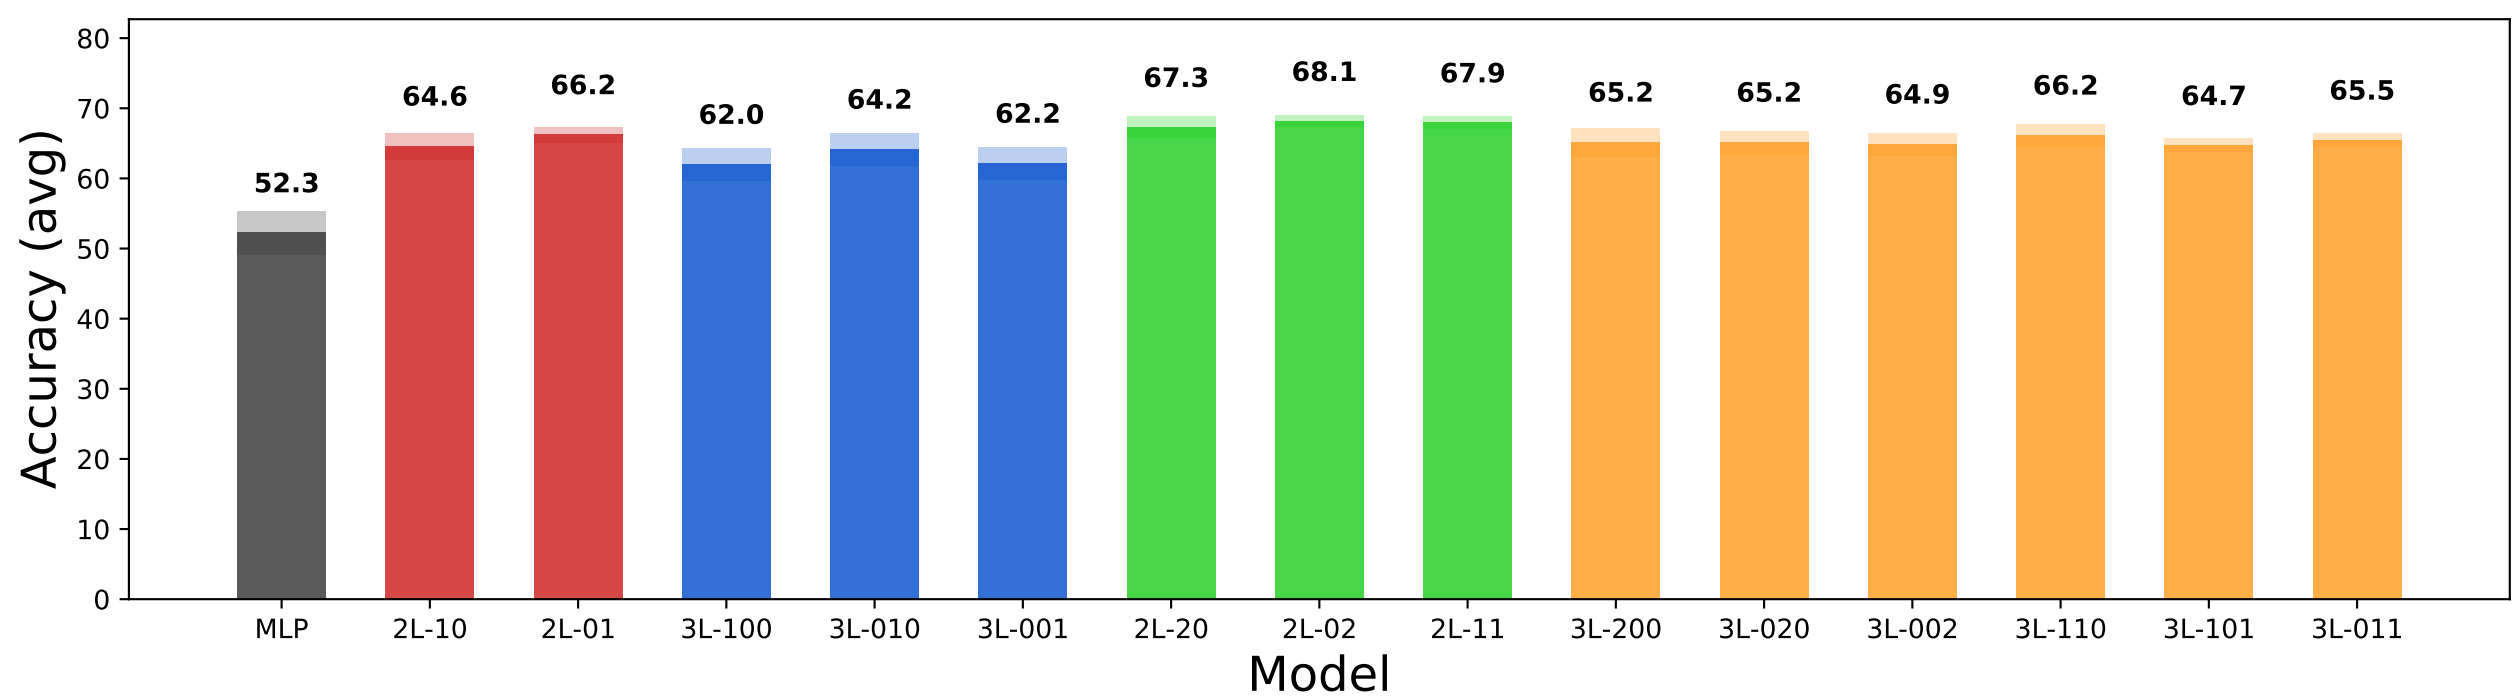

Supplement: supplementary_material [file attachment]

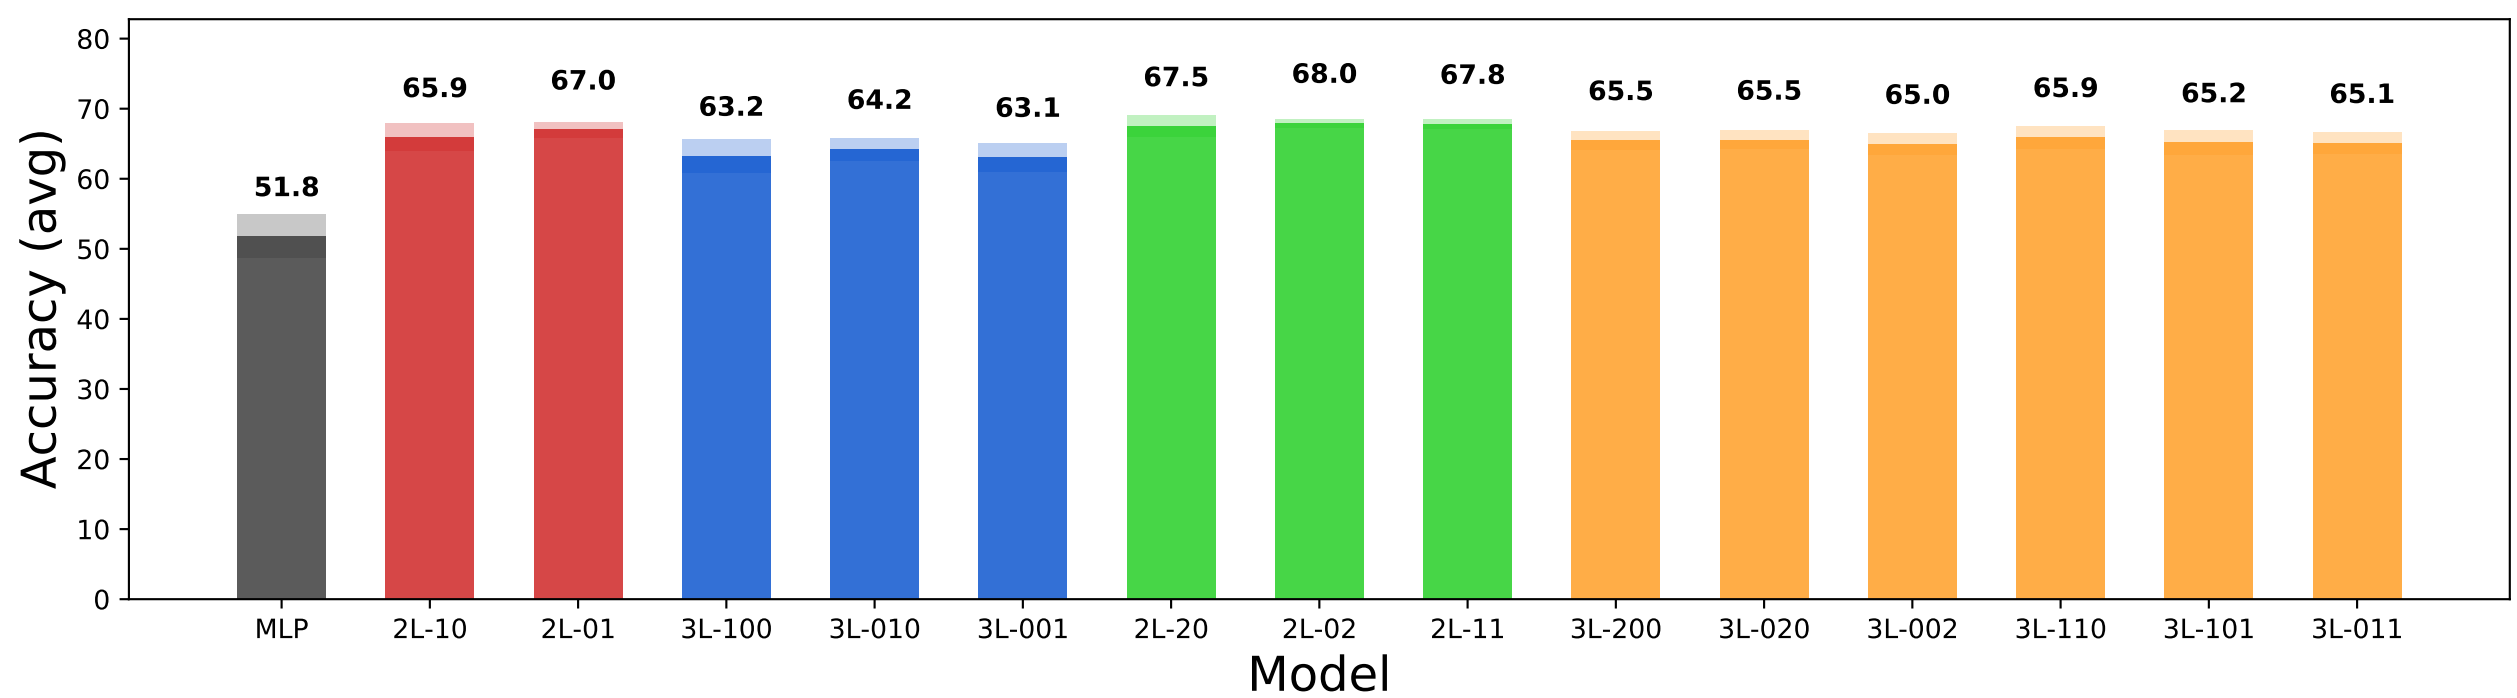

Supplement: supplementary_material [file attachment]

Accuracy (avg)

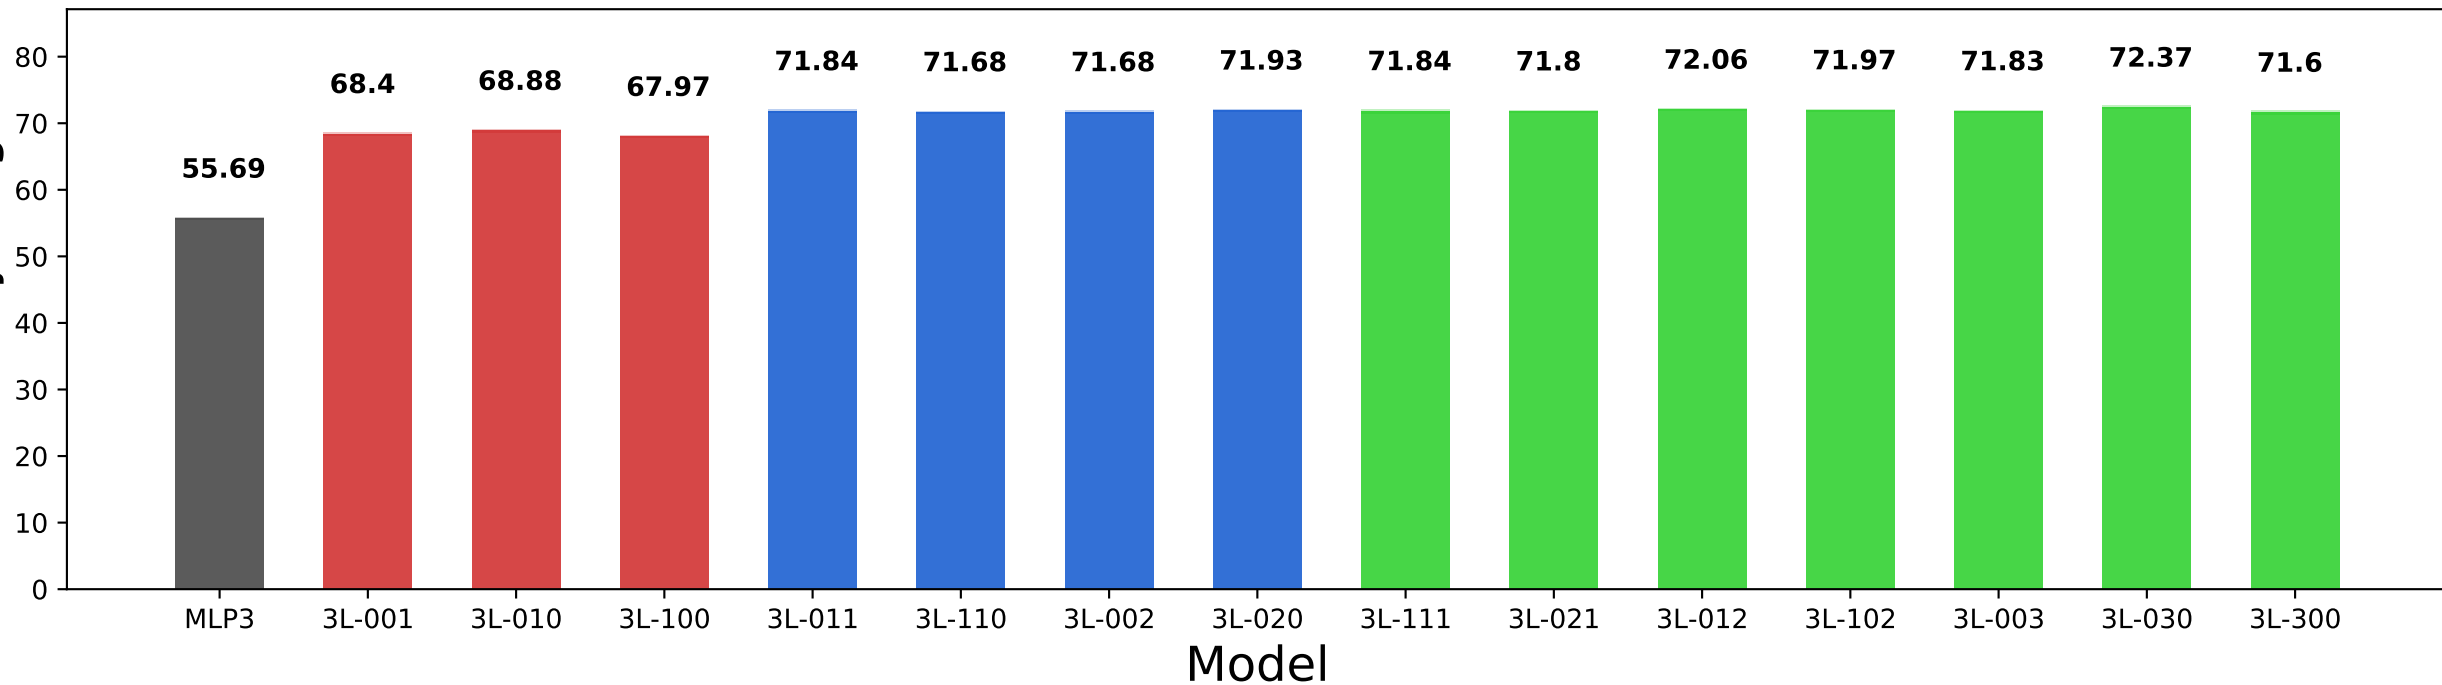

Supplement: supplementary_material [file attachment]

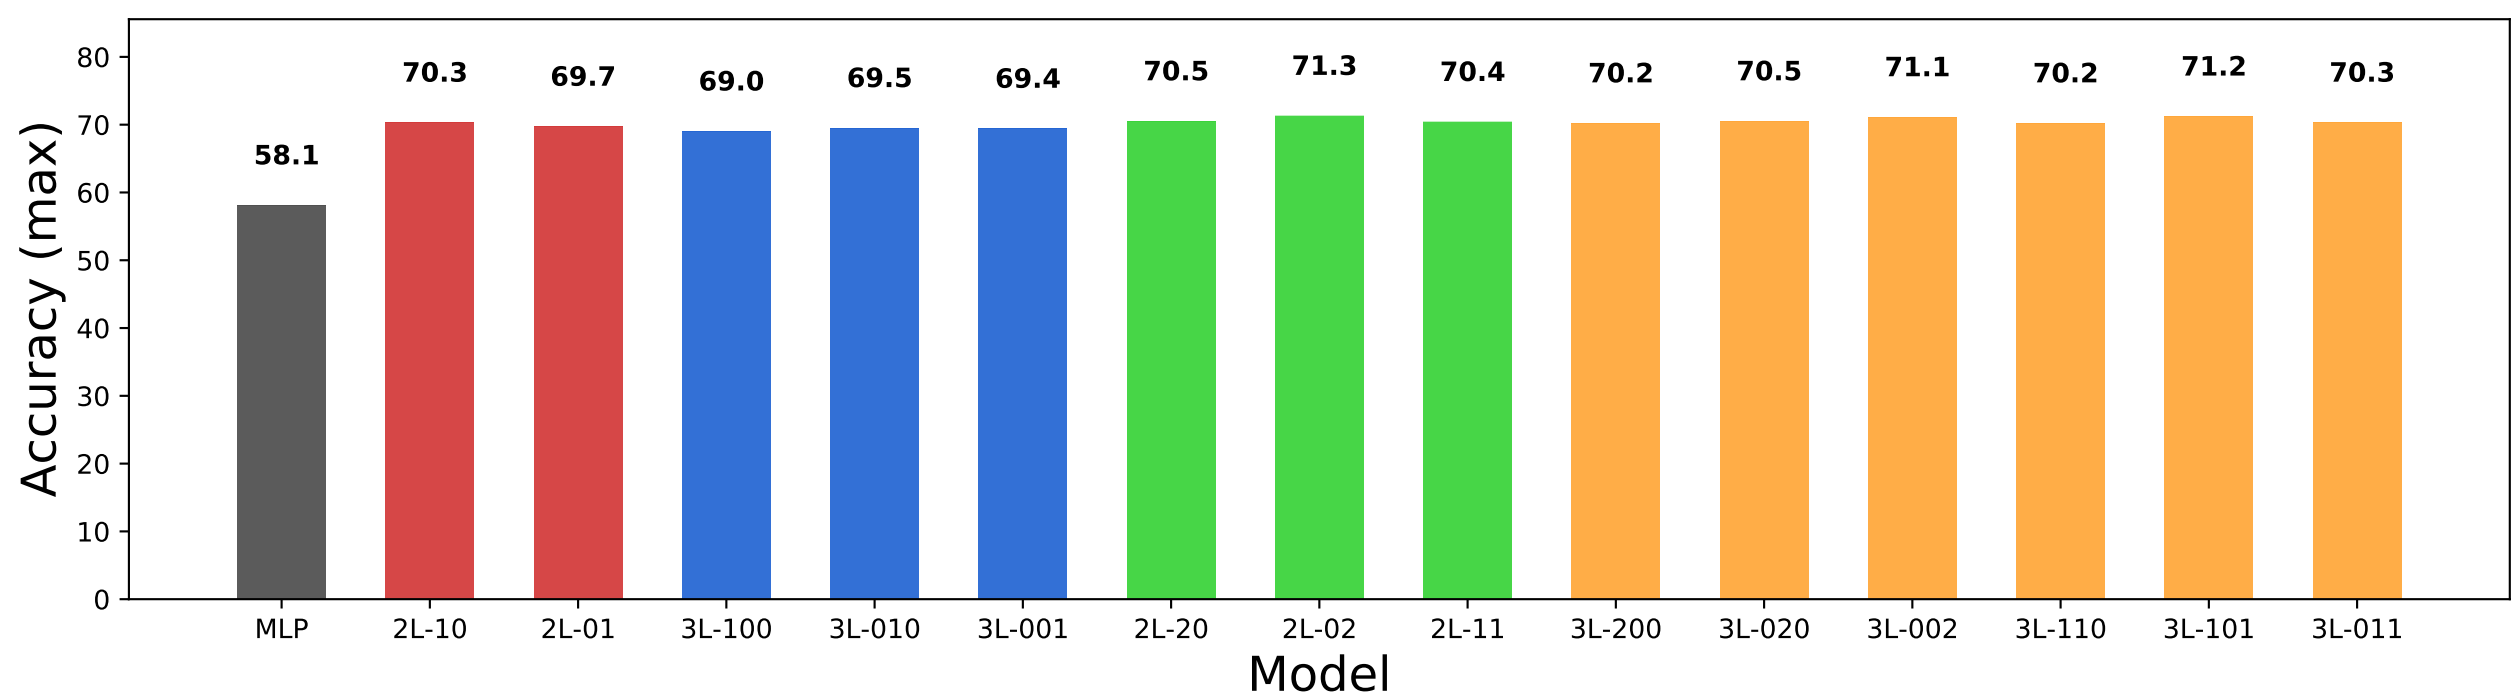

Supplement: supplementary_material [file attachment]

Test Accuracy

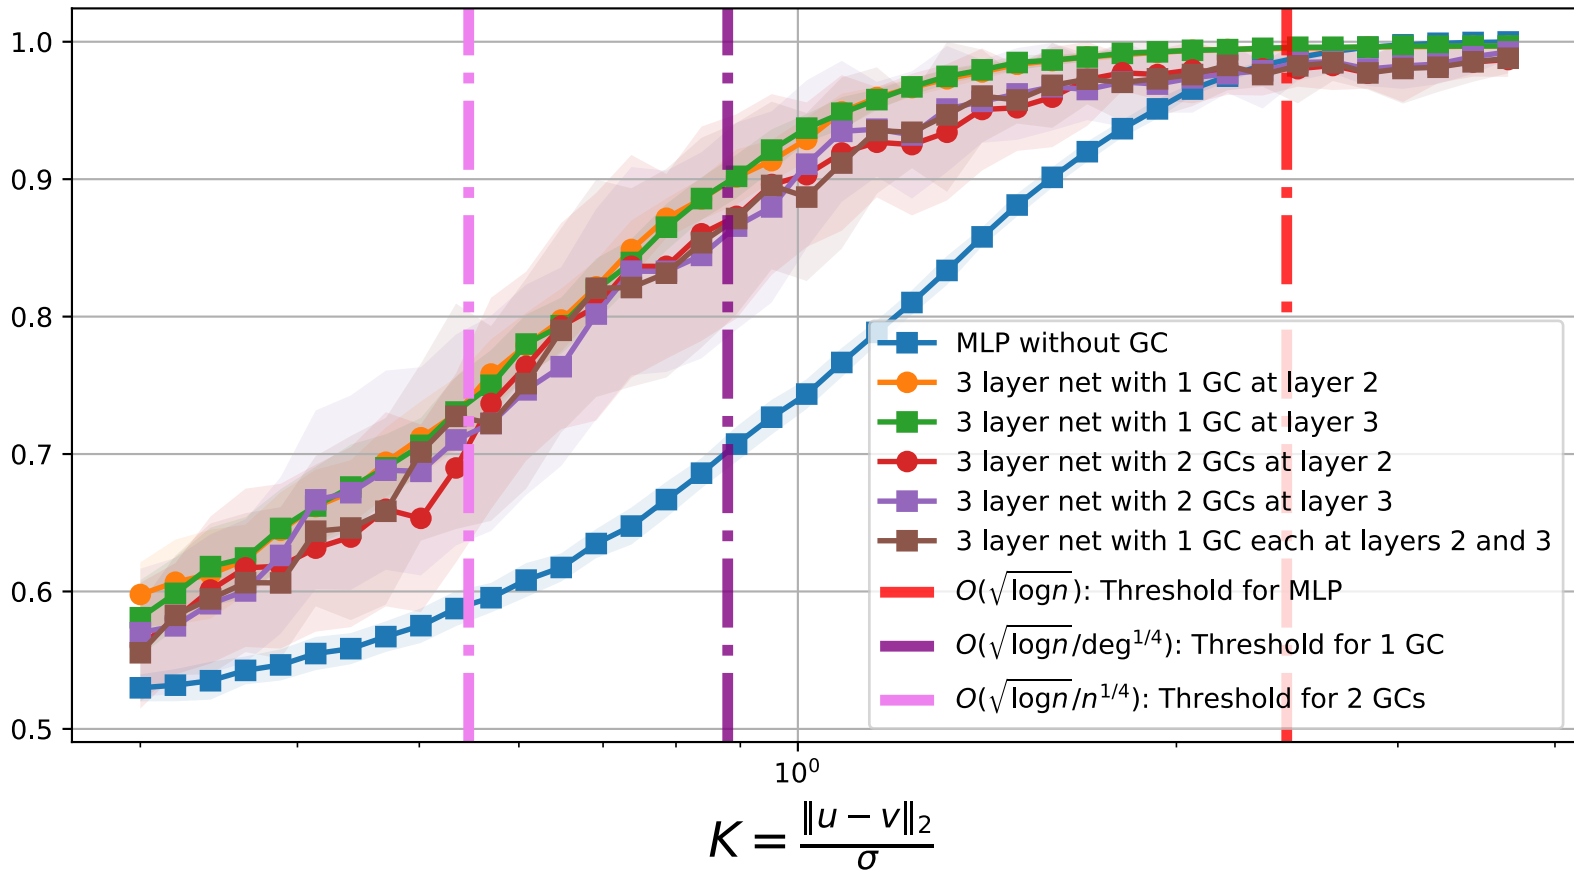

Supplement: supplementary_material [file attachment]

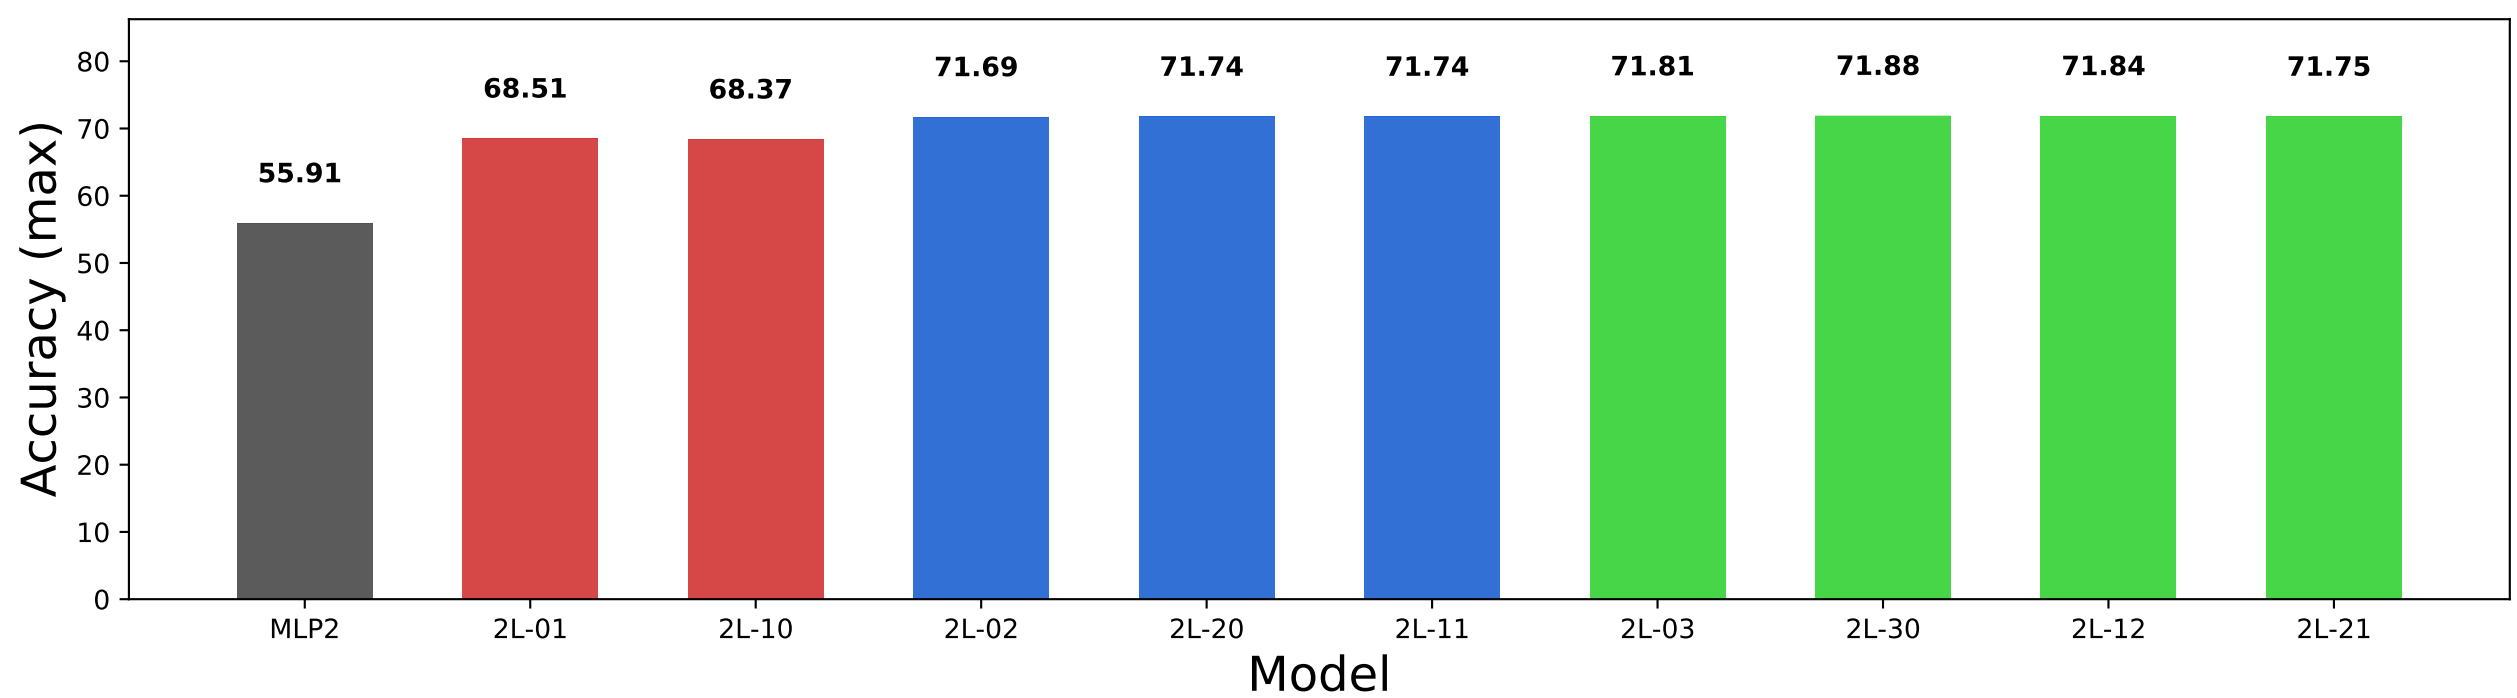

Supplement: supplementary_material [file attachment]

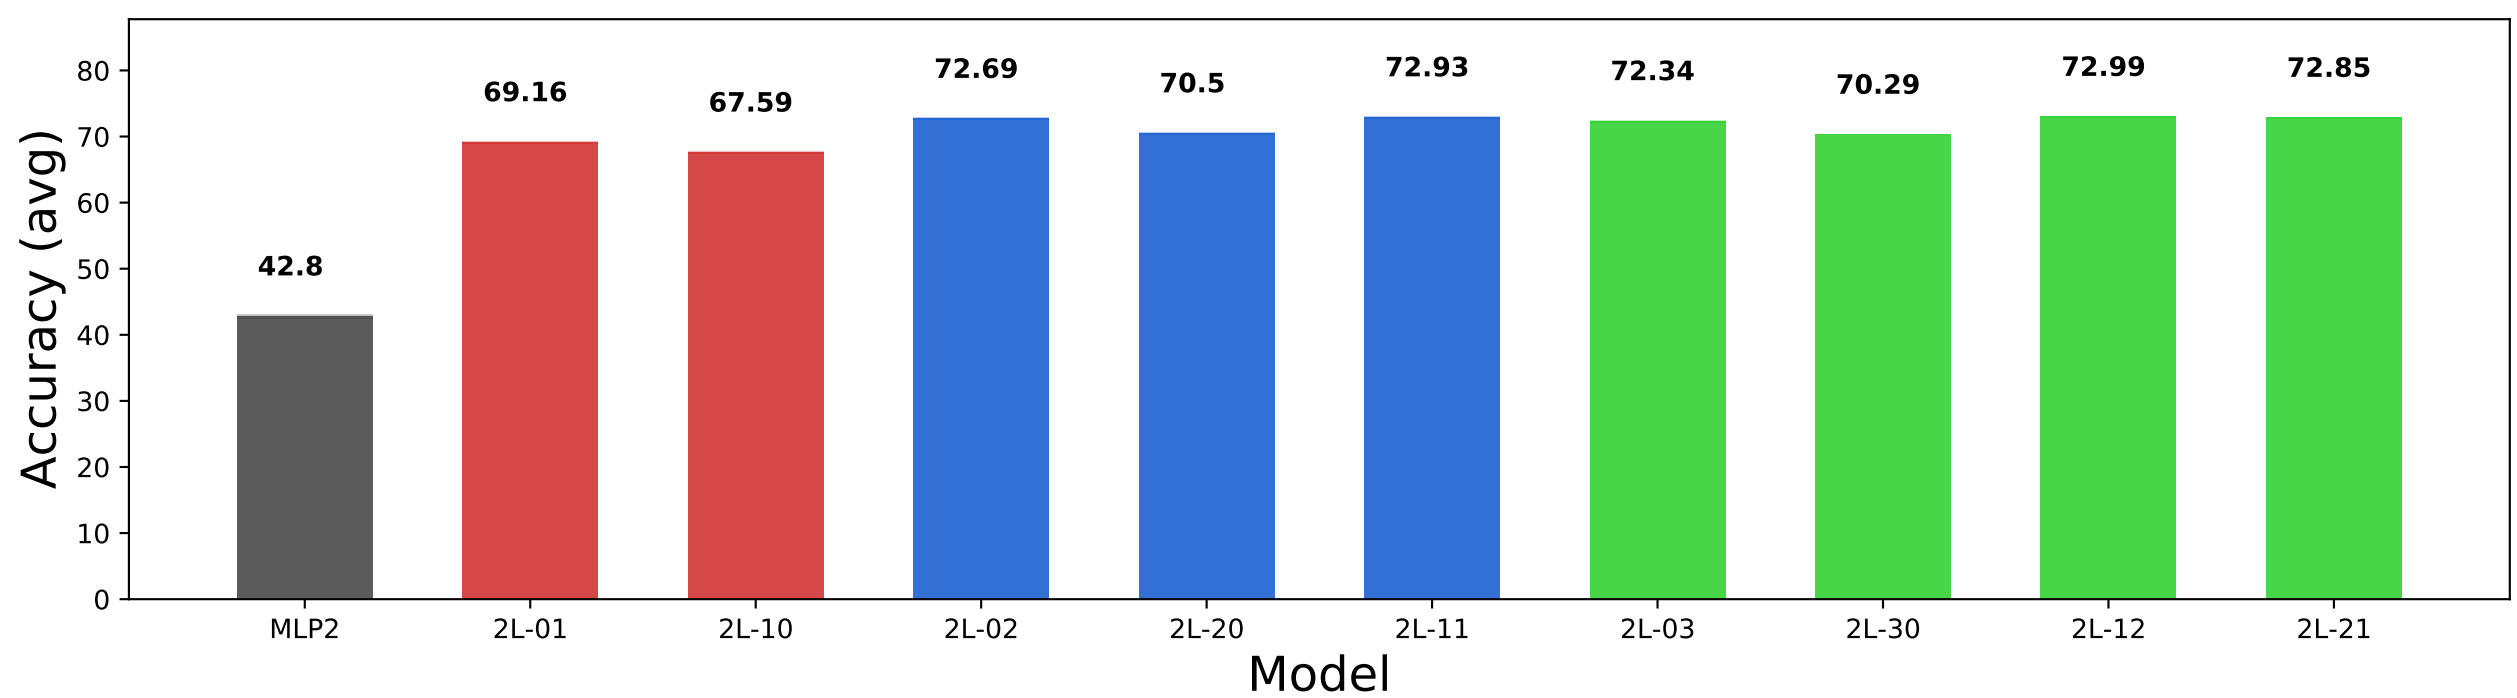

Supplement: supplementary_material [file attachment]

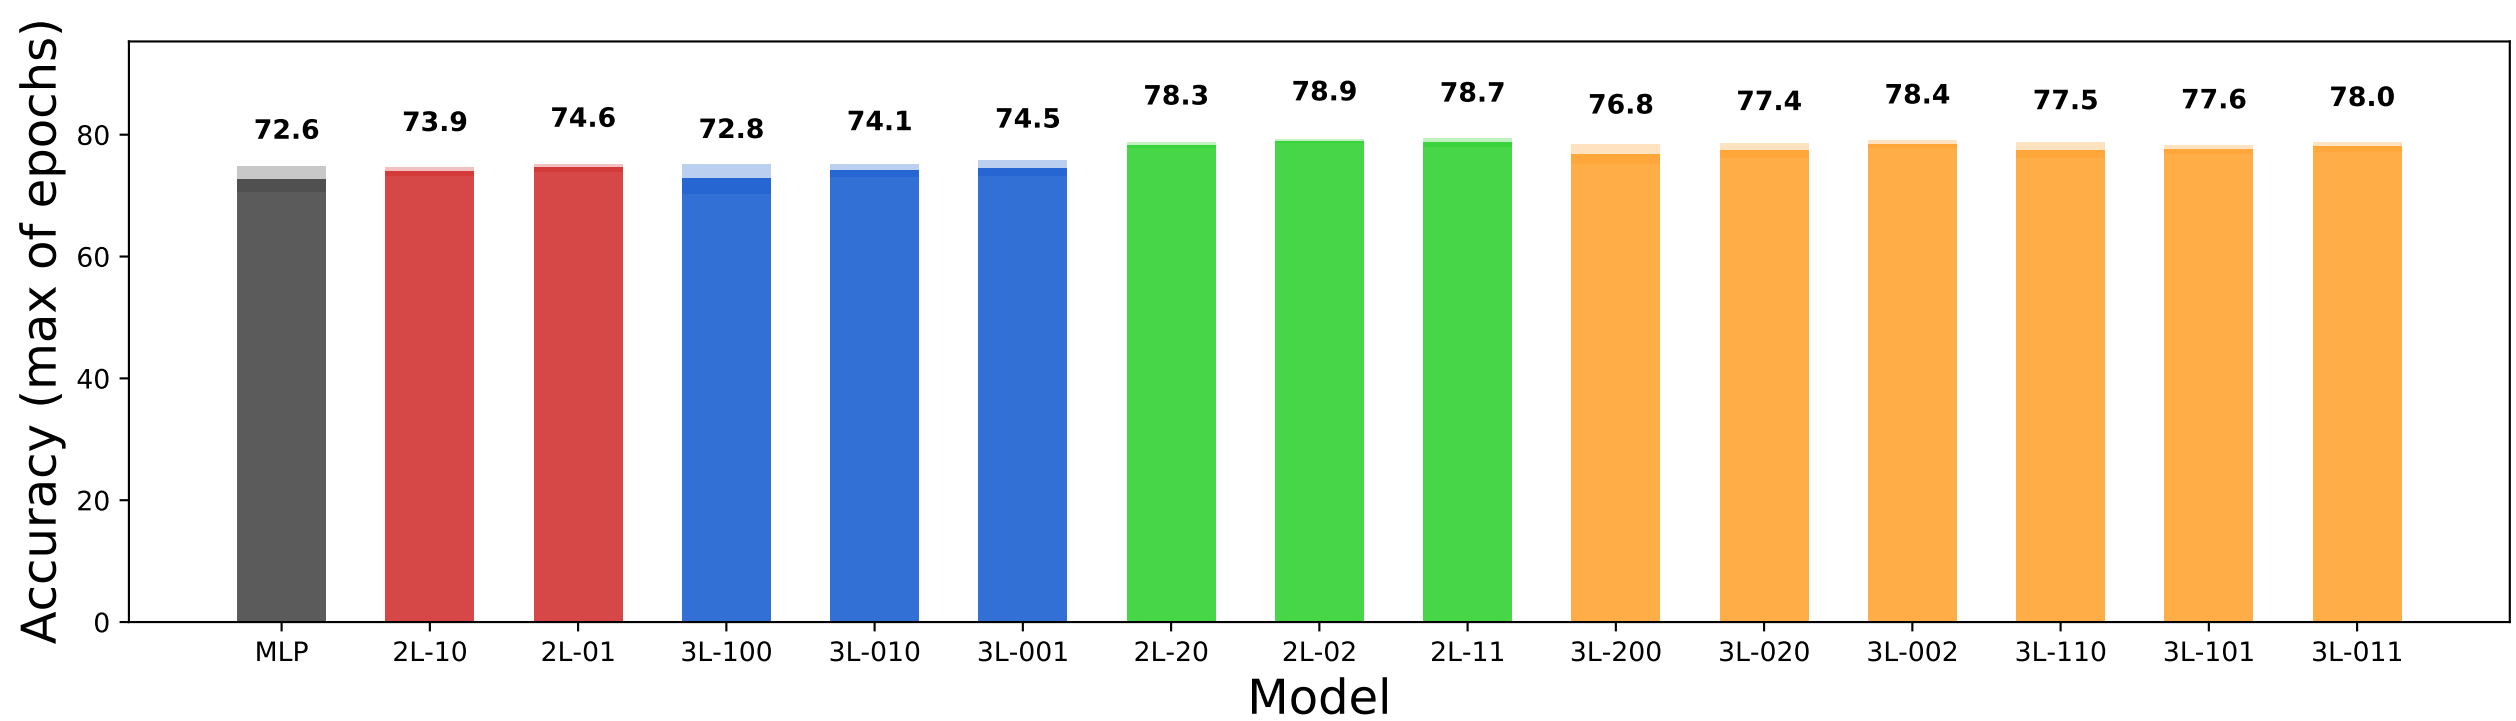

Supplement: supplementary_material [file attachment]

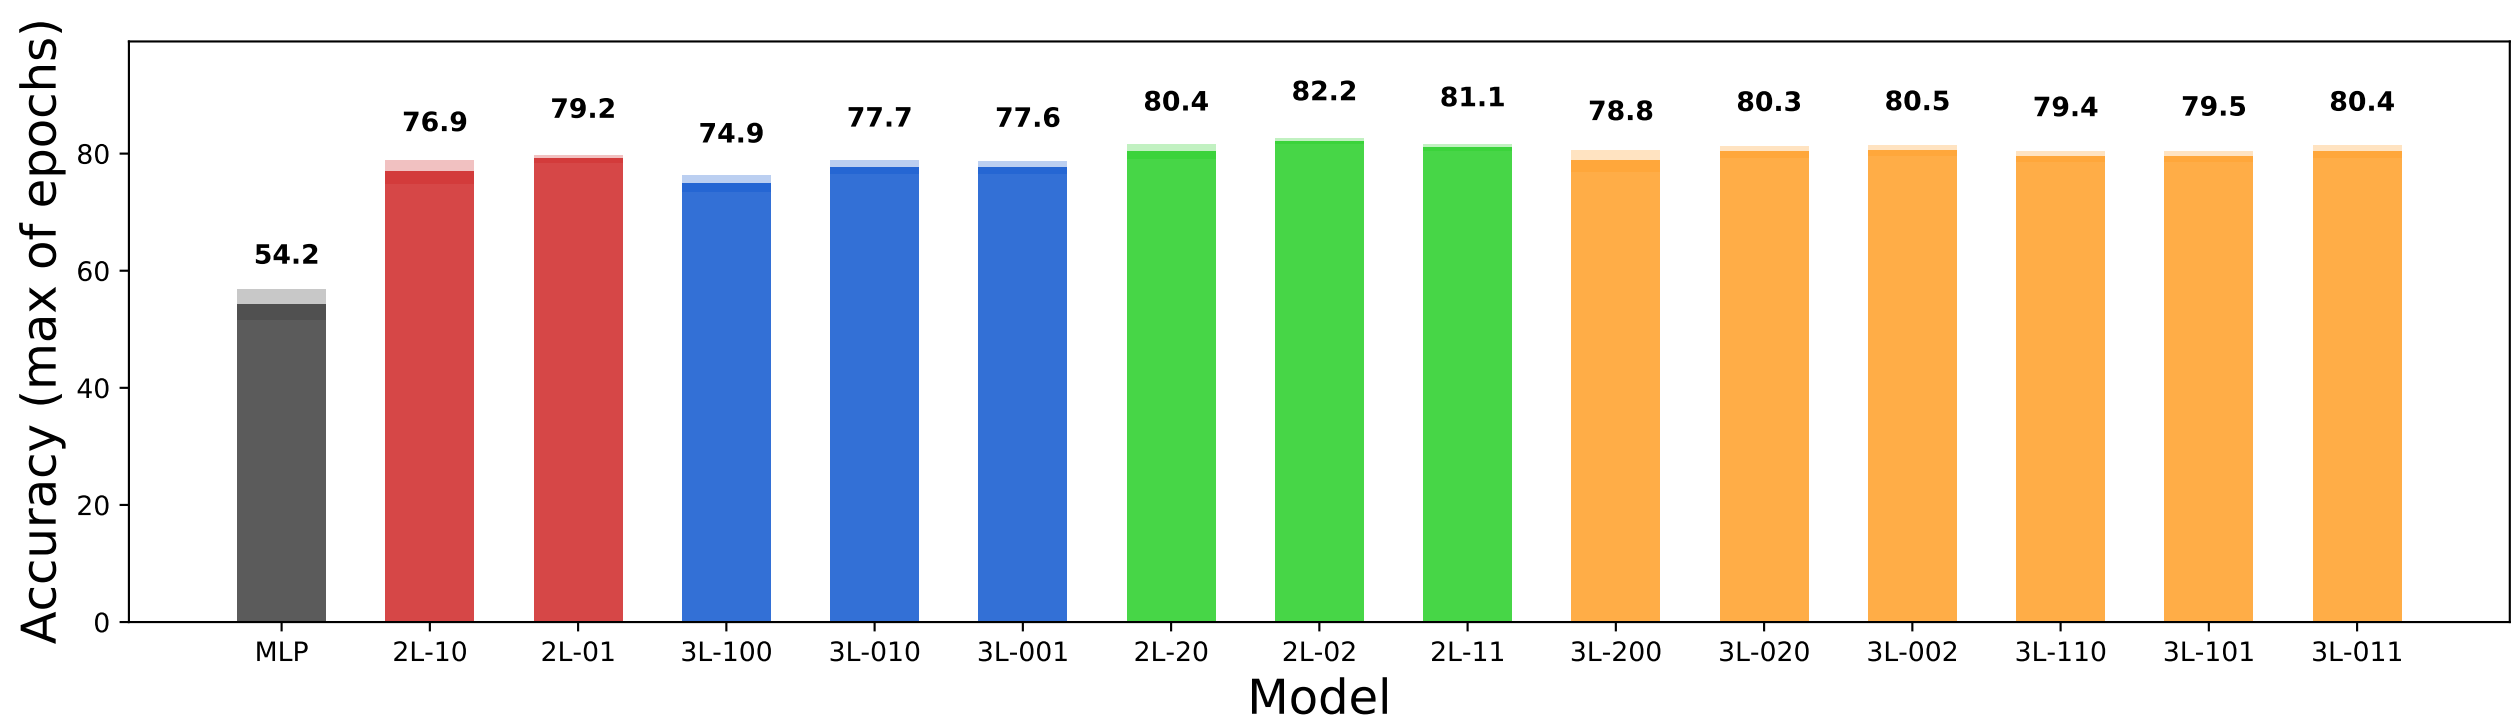

Supplement: supplementary_material [file attachment]

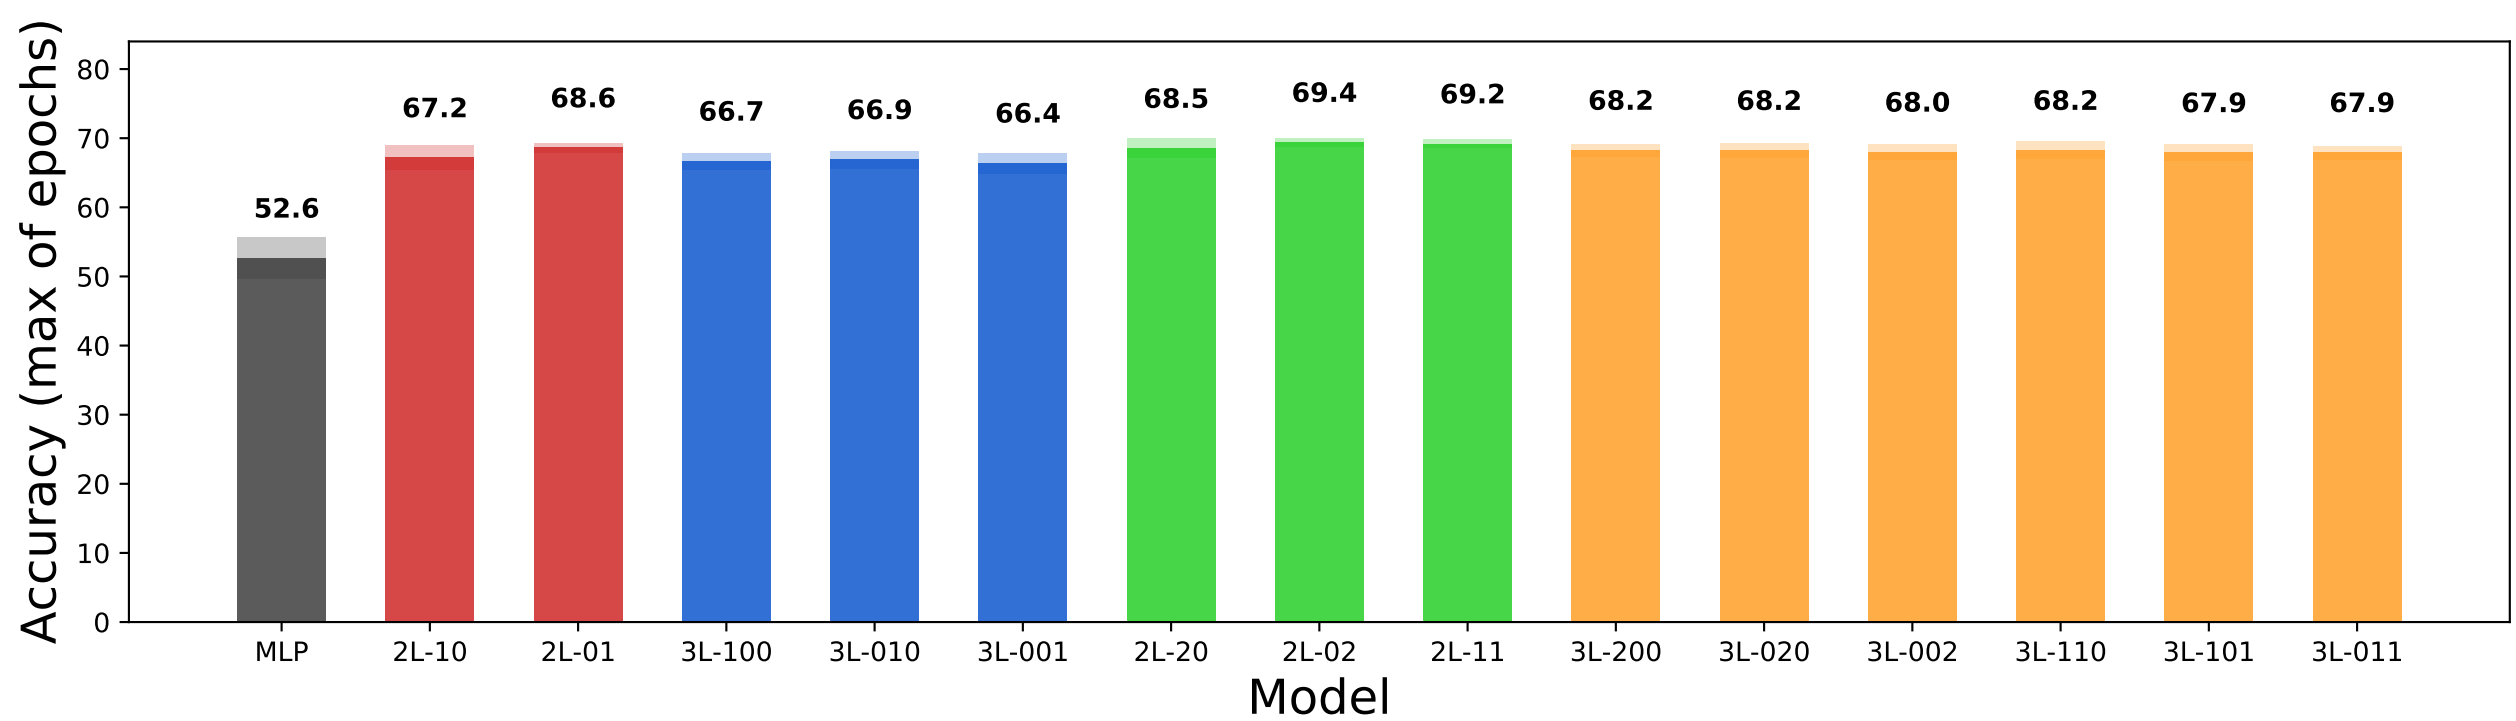

Supplement: supplementary_material [file attachment]

Test Accuracy

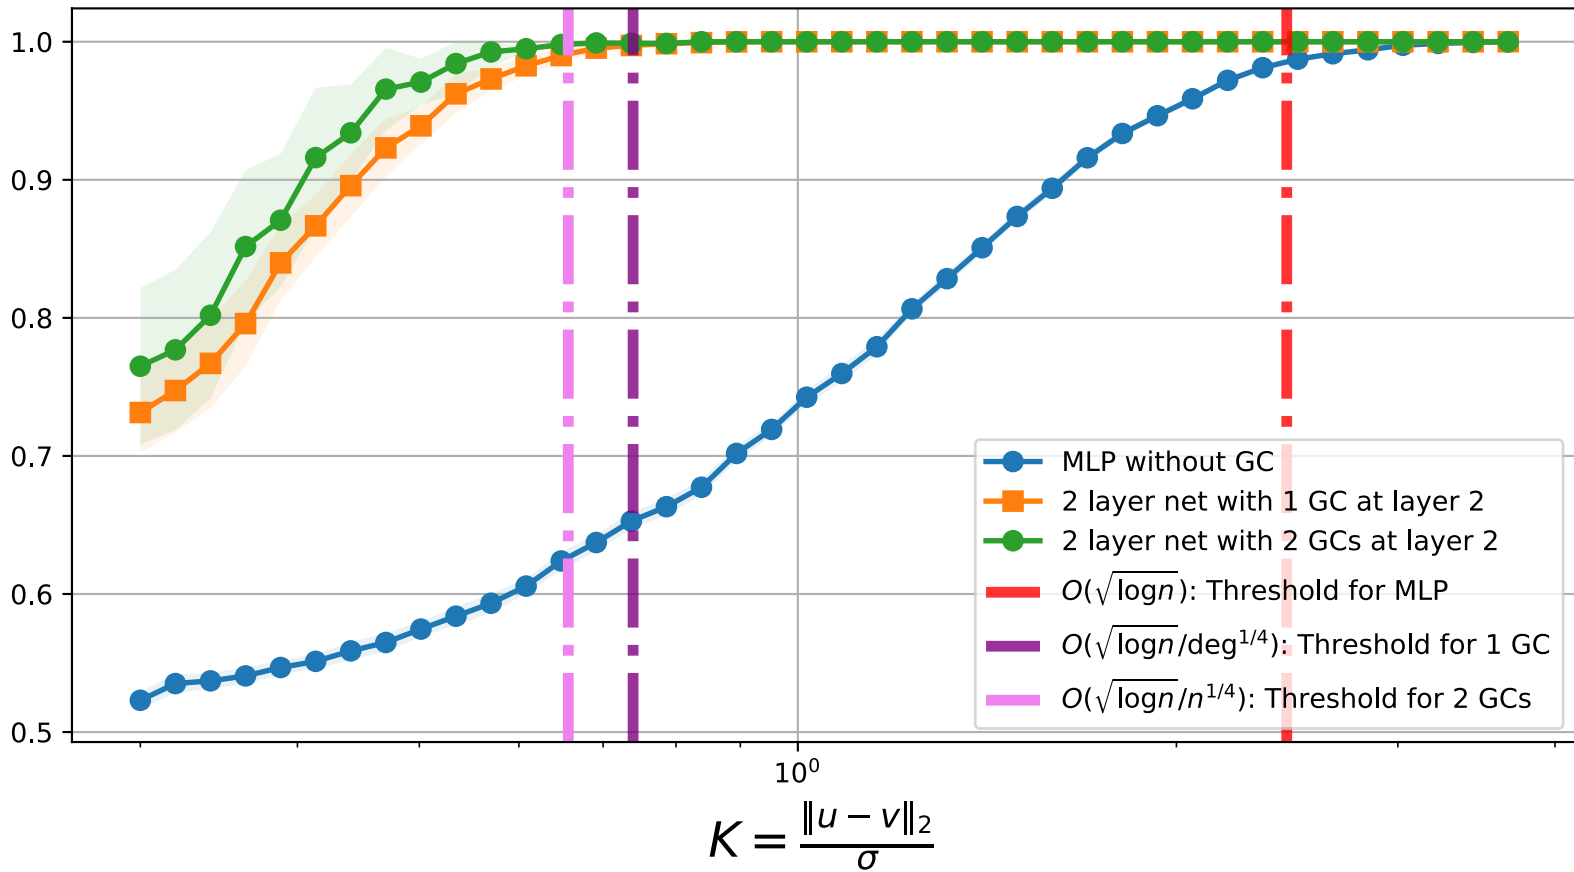

Supplement: supplementary_material [file attachment]

Accuracy (max)

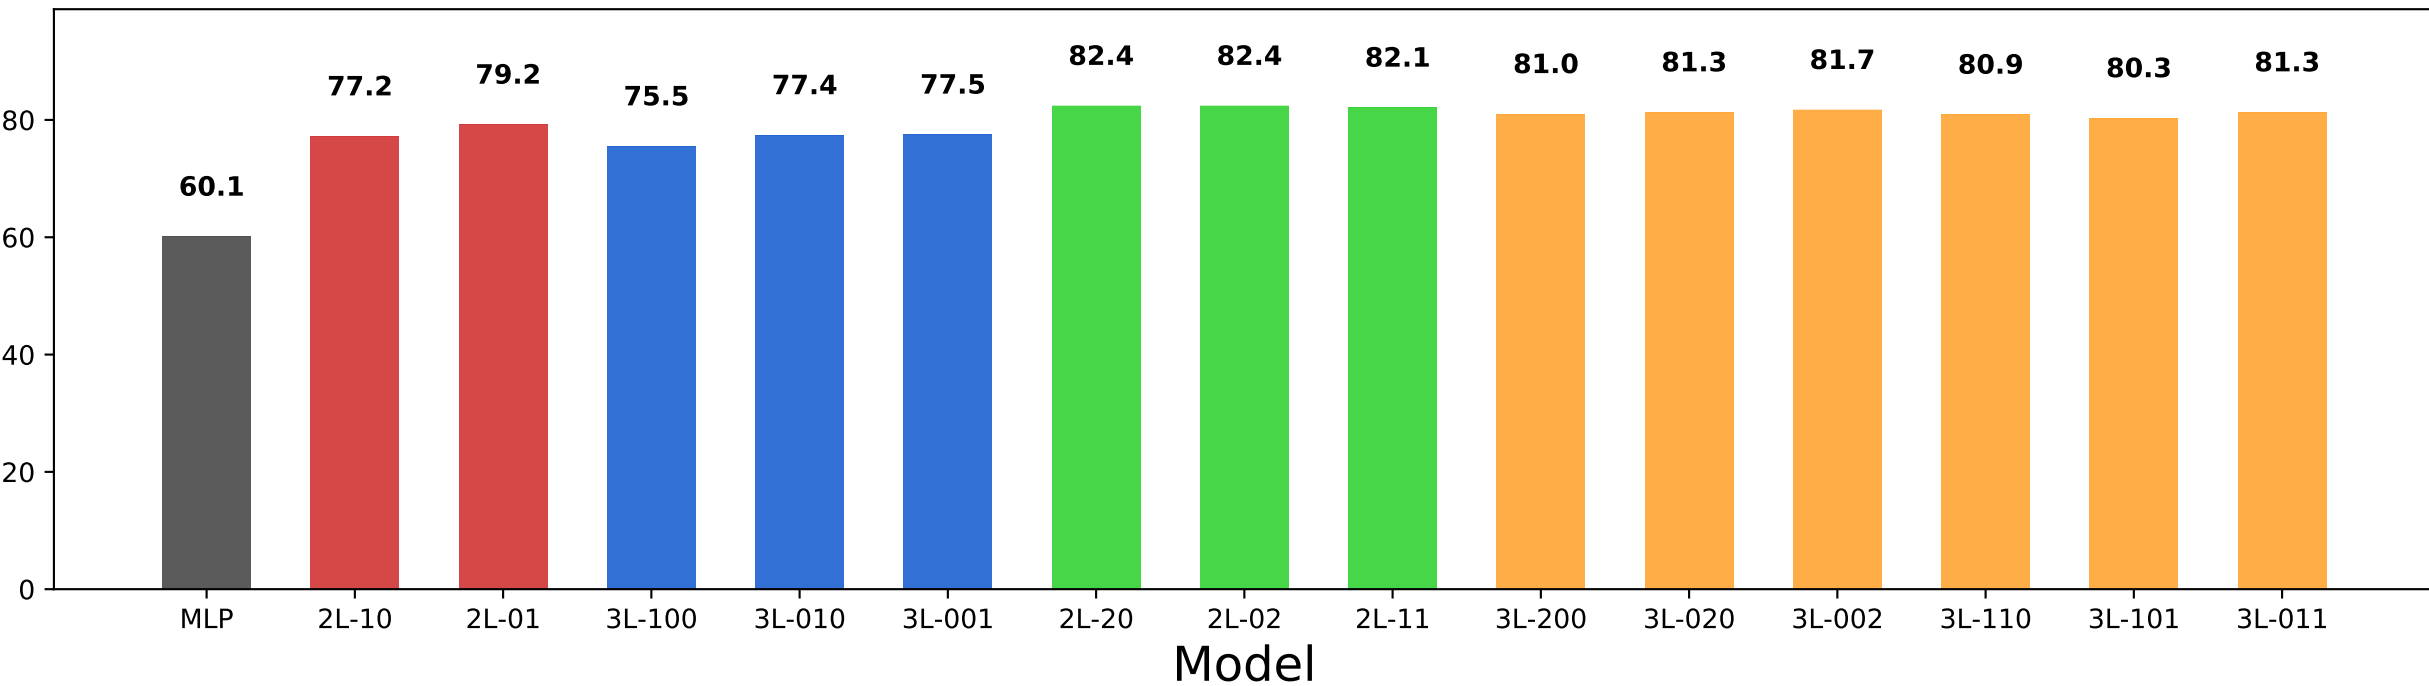

Supplement: supplementary_material [file attachment]

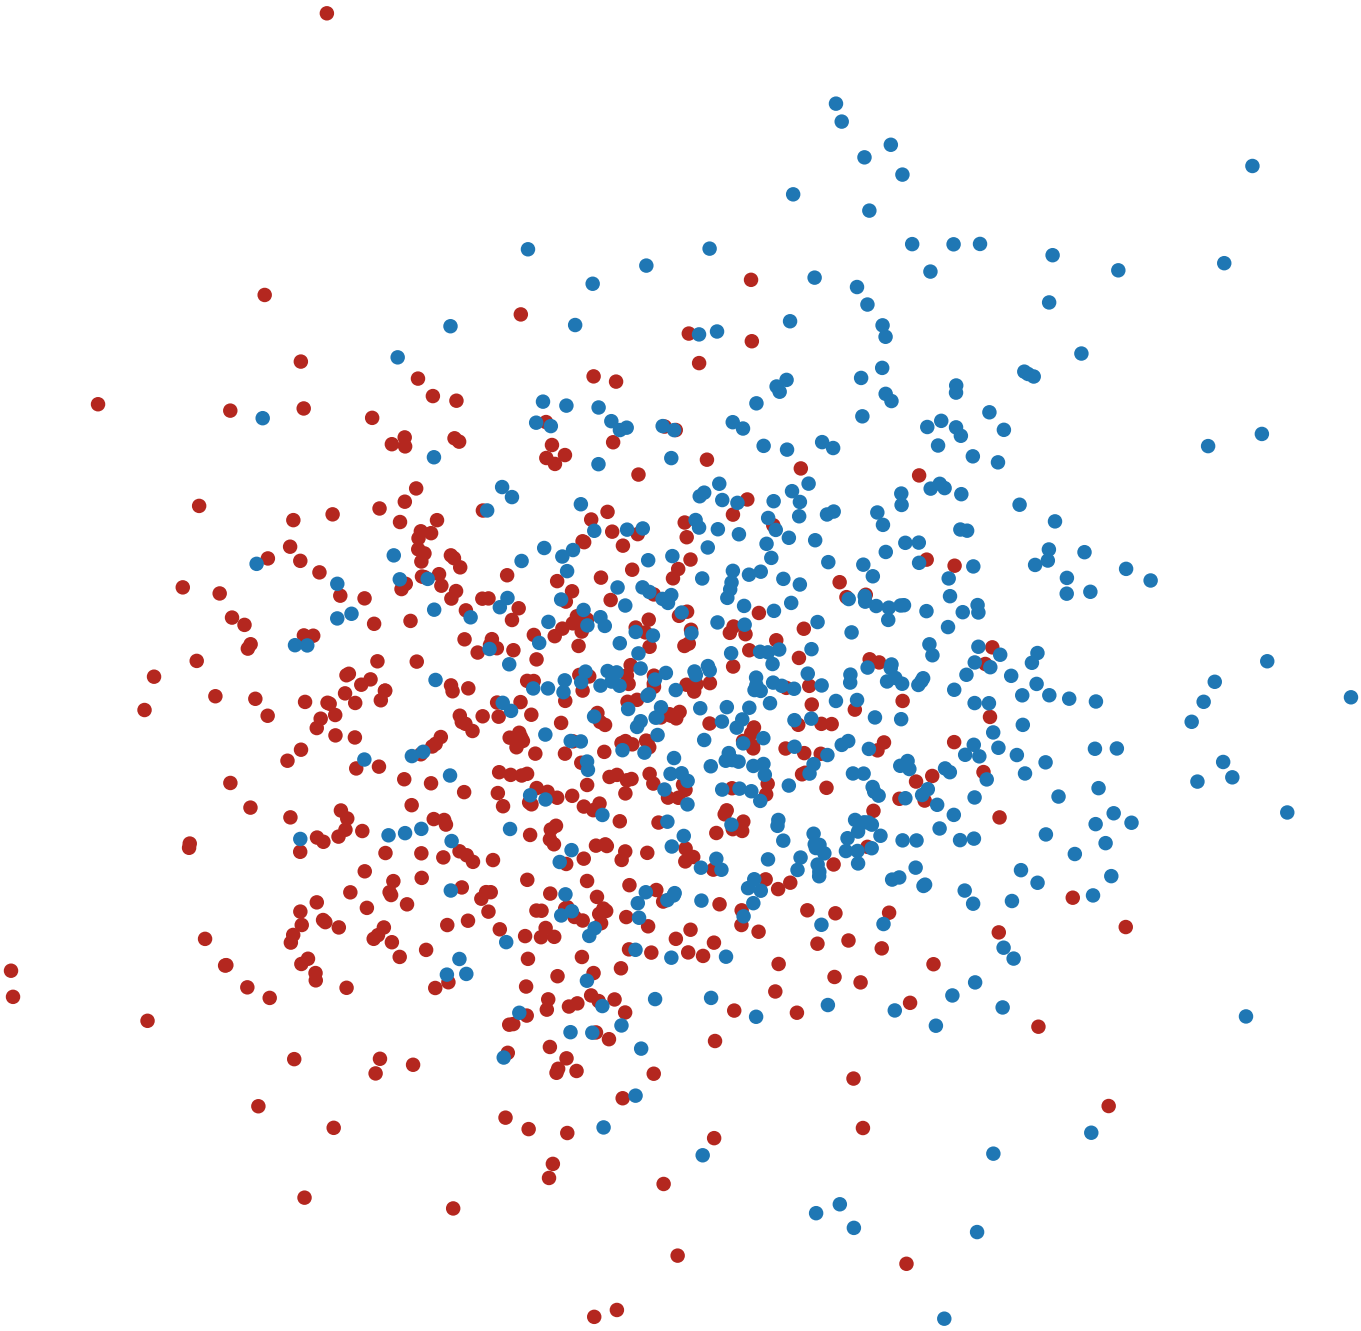

Supplement: supplementary_material [file attachment]
